# Supplementary material
Source: HighWire-hosted journal article supplement (https://cmaj.ca/highwire/filestream/73049/field_highwire_adjunct_files/2/190178-res-3-at.pdf)
Supplement: 190178-res-3-at.pdf [file 190178-res-3-at.pdf]

## Appendix 3 (as supplied by the authors): Supplemental Tables 1-12

**Supplemental Table 1. Prednisolone-equivalent dose conversion factors for glucocorticoids**

| Glucocorticoid     | 10mg prednisolone-equivalent (in mg) |
|--------------------|--------------------------------------|
| Betamethasone      | 1.5                                  |
| Budesonide         | 1.09                                 |
| Cortisone          | 50                                   |
| Deflazacort        | 12                                   |
| Dexamethasone      | 1.5                                  |
| Hydrocortisone     | 40                                   |
| Methylprednisolone | 8                                    |
| Prednisone         | 10                                   |
| Triamcinolone      | 8                                    |

**Supplemental Table 2. List of International Classification of Diseases version 10 codes used to identify infection**

| Infection variable    | Definition group | ICD 10 code                                                                                                                                                                                                                                                                                                                                                                                                                                                                                                                                                                                                                                                                                                                                                                                                                                                                                                                                                                                                                                                                                                                                                                                                                                                                                                                |
|-----------------------|------------------|----------------------------------------------------------------------------------------------------------------------------------------------------------------------------------------------------------------------------------------------------------------------------------------------------------------------------------------------------------------------------------------------------------------------------------------------------------------------------------------------------------------------------------------------------------------------------------------------------------------------------------------------------------------------------------------------------------------------------------------------------------------------------------------------------------------------------------------------------------------------------------------------------------------------------------------------------------------------------------------------------------------------------------------------------------------------------------------------------------------------------------------------------------------------------------------------------------------------------------------------------------------------------------------------------------------------------|
| All-cause             | B                | H10.0, H10.4, H10.5, H10.8, H10.9, H13.2, H16.1, H16.2, H19.3, H60.0, H60.2, H60.3, H60.8, H60.9, H62.0, H62.4, H65.0, H65.2-H65.4, H65.9, H66.0-H66.4, H66.9, H67.1, H67.8, H70.1, H70.8, H70.9, H73.1, H75.0, I52.1, J06.0, J06.8, J06.9, J22.X, J31.0-J31.2, J44.0, J85.1, J85.2, J18.8, J18.9, J32.0-J32.4, J32.8, J32.9, J35.0, K12.2, K36.X, K37.X, K51.5, K52. 3, K57.1, K57.3, K57.5, K57.9, K80.0-K80.5, K81.0, K81.1, K81.9, K83.0, H60.1, L03.0-L03.3, L03.8, L03.9, L98.3, M46.2, M86.0, M86.3-M86.6, M86.9, M86.8, N73.1, N73.2, N73.4, R05.X, R07.0                                                                                                                                                                                                                                                                                                                                                                                                                                                                                                                                                                                                                                                                                                                                                          |
|                       | A                | A41.0, A41.8, A41.9, A87.2, B43.1, B43.2, D73.3, E32.1, G06.0-G06.2, G07X, H10.2, H10.3, H60.0, H60.5, H65.0, H65.1, H66.0, H70.0, H73.0, J00.X, J01.0-J01.4, J01.8, J01.9, J02.0, J02.8, J02.9, J03.0, J03.8, J03.9, J06.0, J16.8, J17.8, J18.0-J18.2, J34.0, J36X, J39.0, J39.1, J85.0, J85.3, K04.6, K04.7, K11.3, K57.0, G03.0-G03.2, G03.8, G03.9, K35.2, K35.3, K35.8, K57.2, K57.4, K57.8, K61.0-K61.4, K63.0, K65.0, K65.8, K65.9, K75.0, K81.0, L02.0-L02.4, L02.8, L02.9, L05.0, L05.9, M65.0, M71.0, M86.0-M86.2, N15.1, N29.1, N35.1, N39.0, N34.0, N41.2, N45.0, N45.9, N73.0, N73.3, N73.5, N75.1, N76.4, O75.3, P78.1, R57.2                                                                                                                                                                                                                                                                                                                                                                                                                                                                                                                                                                                                                                                                                |
| All-cause & bacterial | A                | A00.0, A00.1, A00.9, A01.0-A01.4, A02.0-A02.2, A02.8, A02.9, A03.0-A03.3, A03.8, A03.9, A04.0-A04.9, A15.0-A15.9, A16.0-A16.9, A17.0, A17.1, A17.8, A17.9, A18.0-A18.8, A19.0-A19.2, A19.8, A19.9, A20.0-A20.3, A20.7-A20.9, A21.0-A21.3, A21.7-A21.9, A22.0-A22.2, A22.7-A22.9, A23.0-A23.3, A23.8, A23.9, A24.0-A24.4, A25.0, A25.9, A26.7-A26.9, A27.0, A27.8, A27.9, A28.8, A28.9, A30.0-A30.5, A30.8, A30.9, A31.0, A31.1, A31.8, A31.9, A32.0, A32.1, A32.7-A32.9, A33.X, A34.X, A35.X, A36.0-A36.3, A36.8, A36.9, A39.0, A39.2-A39.5, A39.8, A39.9, A40.0-A40.3, A40.8, A40.9, A41.0-A41.5, A42.0-A42.2, A42.7-A42.9, A54.6, A54.8, A54.9, A46.X, A48.0, A48.8, A49.0-A49.3, A49.8, A49.9, A54.0, A54.2-A54.4, A56.4, A57.X, A66.0-A66.4, A66.6-A66.9, A67.0-A67.3, A67.9, A68.0, A68.1, A68.9, A69.1, A70.X, A71.0, A71.1, A71.9, A74.0, A74.8, A74.9, A75.0-A75.3, A75.9, A77.0, A79.0, A79.8, A79.9, B47.1, B92.X, B94.0, B95.0-B95.8, B96.0-B96.2, B96.4, B96.5, B96.7, B96.8, G00.0-G00.3, G00.8, G00.9, G01.X, G04.2, G05.0, I32.0, I41.0, I52.0, J13X, J15.0- J15.9, J16.0, J17.0, J20.0, J20.2, J65X, K23.0, K67.0-K67.3, K93.0, L00.X, M00.0-M00.2, M00.8, M01.0, M01.1, M01.3, M02.3, M03.0, M03.1, M49.0-M49.2, M63.0, M68.0, M73.0, N33.0, N74.0, N74.1, O98.0, P36.0-P36.5, P36.8, P36.9, P37.2, R76.1 |
|                       | B                | A09.9, A37.0, A37.1, A37.8, A37.9, A54.5, A74.0, H67.0, J02.0, J03.0                                                                                                                                                                                                                                                                                                                                                                                                                                                                                                                                                                                                                                                                                                                                                                                                                                                                                                                                                                                                                                                                                                                                                                                                                                                       |

|                       |   |                                                                                                                                                                                                                                                                                                                                                                                                                                                                                                                                                                                                                                                                                                                                                                                                                                                                                                                                                          |
|-----------------------|---|----------------------------------------------------------------------------------------------------------------------------------------------------------------------------------------------------------------------------------------------------------------------------------------------------------------------------------------------------------------------------------------------------------------------------------------------------------------------------------------------------------------------------------------------------------------------------------------------------------------------------------------------------------------------------------------------------------------------------------------------------------------------------------------------------------------------------------------------------------------------------------------------------------------------------------------------------------|
| All-cause & viral     | A | A08.0-A08.4, A80.9, A81.0, A81.8, A81.9, A82.0, A82.1, A82.9, A83.0, A83.6, A83.8, A83.9, A84.0, A84.8, A84.9, A85.0-A85.2, A85.8, A86.X, A87.0, A87.1, A87.8, A87.9, A88.0, A88.8, A89.X, A90.X, A91.X, A92.0, A92.3, A92.8, A92.9, A93.0, A93.8, A94.X, A95.0, A95.1, A95.9, A96.0, A96.8, A96.9, A98.0, A98.3, A98.4, A98.8, A99.X, B00.0, B00.1, B00.3-B00.5, B00.7-B00.9, B01.0, B01.1, B01.8, B01.9, B02.1, B02.0, B02.2, B02.3, B02.7-B02.9, B03.X, B05.0, B05.1, B05.3, B05.4, B05.8, B05.9, B06.0, B26.1, B06.8, B06.9, B07.X, B08.0, B08.4, B08.8, B09.X, B25.0, B25.2, B25.8, B25.9, B26.0, B26.2, B26.3, B26.8, B26.9, B27.0, B27.1, B27.8, B27.9, B30.3, B33.0, B33.2-B33.4, B33.8, B34.0-B34.4, B34.8, B34.9, B91.X, B94.1, B96.3, B97.0-B97.8, G02.0, G05.1, G14.X, G73.1, G93.3, I41.1, J10.0, J11.0, J12.2, B01.2, B05.2, G53.0, J12.0, J12.1, J12.3, J12.8, J12.9, J14X, J17.1, J20.1, M01.4, M01.5, M89.6, O26.4, O35.3, O98.4, O98.5 |
|                       | B | B00.2, B08.5, B16.0-B16.2, B16.9, B17.0, B17.1, B17.8, B17.9, B18.0-B18.2, B18.8, B18.9, B19.0, B19.9, B25.1, B30.0-B30.2, B94.2, H19.1, H62.1                                                                                                                                                                                                                                                                                                                                                                                                                                                                                                                                                                                                                                                                                                                                                                                                           |
|                       | C | A49.2, B30.8, B30.9, J09.X, J10.0, J10.1, J10.8, J11.0, J11.1, J11.8, J20.4                                                                                                                                                                                                                                                                                                                                                                                                                                                                                                                                                                                                                                                                                                                                                                                                                                                                              |
| All-cause & parasitic | A | A06.2, A06.4-A06.6, A07.0, A07.8, A07.9, B50.0, B50.8, B50.9, B51.0, B51.8, B51.9, B52.0, B52.8, B52.9, B53.0, B53.1, B53.8, B54.X, B55.0-B55.2, B55.9, B56.0, B56.1, G02.8, B56.9, B58.0-B58.3, B58.8, B58.9, B60.0, B60.8, B64.X, B65.0-B65.2, B65.8, B65.9, B67.8, B67.9, B71.0, B71.8, B71.9, B76.1, B81.0, B81.4, B81.8, B82.0, B82.9, B83.0, B83.8, B83.9, B85.0-B85.2, B85.4, B87.0-B87.4, B87.8, B87.9, B88.0, B89.X, B94.0, B94.8, B94.9, D47.5, G05.2, G53.1, G63.0, G73.4, G94.0, H03.0, H06.1, H22.0, H32.0, H94.0, I32.1, I41.2, I42.3, I43.0, I68.1, I98.1, J17.3, J20.3, J20.5-J20.7, J21.0, J21.1, K77.0, L92.2, M01, M35.4, M49.3, M63.1, N08.0, N16.0, N22.0, N77.0, N77.1, O98.6, O98.8, O989                                                                                                                                                                                                                                         |
|                       | B | H13.0, H13.1, H19.2, H62.3                                                                                                                                                                                                                                                                                                                                                                                                                                                                                                                                                                                                                                                                                                                                                                                                                                                                                                                               |
| All-cause & fungal    | A | B35.9, B36.8, B37.0-B37.9, B38.0-B38.4, B38.7-B38.9, B41.0, B41.7-B41.9, B44.0-B44.2, B44.7-B44.9, B45.0-B45.3, B45.7-B45.9, B46.8, B48.7, B48.8, G02.1, J17.2, M01.6                                                                                                                                                                                                                                                                                                                                                                                                                                                                                                                                                                                                                                                                                                                                                                                    |
|                       | B | H62.2                                                                                                                                                                                                                                                                                                                                                                                                                                                                                                                                                                                                                                                                                                                                                                                                                                                                                                                                                    |

Note: Group A refers to diagnostic codes included regardless of antibiotic prescription; Group B refers to diagnostic codes for which prescribed medication within 2 months was required; Group C refers to diagnostic codes for which prescribed antiviral drug was required (as shown in Figure 2 of the manuscript).

**Supplemental Table 3. Number of patients vaccinated at baseline\* and during follow-up per age group**

| Vaccine type                           | All patients  | <60 years    | 60-74 years   | ≥75 years     |
|----------------------------------------|---------------|--------------|---------------|---------------|
| <i>At baseline</i>                     |               |              |               |               |
| Influenza                              | 25,640 (64.2) | 922 (21.5)   | 9,802 (61.2)  | 14,916 (76.0) |
| Varicella zoster                       | 254 (0.6)     | -            | 90 (0.6)      | 164 (0.8)     |
| Pneumococcal                           | 19,515 (48.9) | 487 (11.4)   | 6,937 (43.3)  | 12,091 (61.6) |
| <i>At baseline or during follow-up</i> |               |              |               |               |
| Influenza                              | 33,904 (89.3) | 2,444 (57.1) | 13,935 (86.9) | 17,525 (89.3) |
| Varicella zoster                       | 2,295 (5.8)   | 86 (2.0)     | 1,499 (9.4)   | 710 (3.6)     |
| Pneumococcal                           | 29,660 (74.3) | 1,540 (36.0) | 12,488 (77.9) | 15,632 (79.6) |

\*Vaccination at baseline was defined as a recorded vaccination at any time before the start of follow-up for varicella zoster and pneumococcal vaccination and as a recorded vaccination within 1 year prior to the start of follow-up for vaccination against influenza. Vaccination against varicella zoster was introduced in the UK in 2013

**Supplemental Table 4. Prescribed anti-inflammatory and disease-modifying anti-rheumatic medication**

| <b>Type of medication</b>                                    |                     |
|--------------------------------------------------------------|---------------------|
| <b>Drugs prescribed in last year before follow-up start,</b> |                     |
| Oral glucocorticoids                                         | 7,487 (18.7)        |
| Inhaled or nasal glucocorticoids                             | 7,676 (19.2)        |
| Intramuscular glucocorticoids                                | 848 (2.1)           |
| Rectal glucocorticoids                                       | 946 (2.4)           |
| Topical glucocorticoids                                      | 1,124 (2.8)         |
| NSAIDS                                                       | 23,935 (59.9)       |
| <b>Oral glucocorticoids at the end of follow-up</b>          |                     |
| Ever use since study entry*, n (%)                           | 34,499 (86.4)       |
| Current use, n (%)                                           | 19,679 (49.3)       |
| Current daily dose** in mg, median [IQR]                     | 5.0 [3.0, 10.0]     |
| Cumulative dose in last year**, median [IQR]                 | 1,597.5 [780-2,552] |
| Total cumulative dose **, median [IQR]                       | 3,452 [1,607-6,465] |
| <b>DMARDs prescribed during follow-up<sup>#</sup>, n (%)</b> |                     |
| Methotrexate                                                 | 3,809 (9.5)         |
| Azathioprine                                                 | 1,317 (3.3)         |
| Azathioprine                                                 | 478 (1.2)           |
| Sulfasalazine                                                | 345 (0.9)           |
| Hydroxychloroquine or chloroquine                            | 328 (0.8)           |
| Tacrolimus                                                   | 62 (0.2)            |
| Leflunomide                                                  | 51 (0.1)            |
| Other                                                        | 63 (1.2)            |

\*Ever use defined since 1 year prior to the start of follow-up; \*\*Excluding patients without prescribed oral glucocorticoids; <sup>#</sup> Patients might have received more than one type of DMARD. The 'other' category includes: auranofin, ciclosporin, cyclophosphamide, mycophenolate mofetil, penicillamine, auothiomalate and injectable gold product.

Note: DMARDs, disease-modifying antirheumatic drugs; IQR, interquartile range; NSAIDs, non-steroidal anti-inflammatory drugs; Follow-up defined as for the analysis of all-cause infection

**Supplemental Table 5. Observation time and incidence rates of infections in the cohort**

|                                                  | Infection type      |                  |                  |                  |                  |
|--------------------------------------------------|---------------------|------------------|------------------|------------------|------------------|
|                                                  | All-cause           | Bacterial        | Viral            | Parasitic        | Fungal           |
| <b>Incidence number of infections, n (%)</b>     | 22,234 (100)        | 5,234 (23.5)     | 5,344 (24.0)     | 1,120 (5.0)      | 5,416 (24.4)     |
| <b>Total person-years of follow-up</b>           | 138,412             | 213,947          | 206,713          | 225,042          | 205,960          |
| <b>Time at risk (years), median [IQR]</b>        | 2.4 [0.9-5.0]       | 4.3 [1.9-7.9]    | 5.2 [1.8-7.7]    | 4.7 [2.1-8.4]    | 4.1 [1.8-7.7]    |
| <b>Incidence per 1,000 person-years (95% CI)</b> |                     |                  |                  |                  |                  |
| <b>Overall</b>                                   | 160.7 (159.3-162.2) | 24.5 (23.9-25.0) | 25.9 (25.3-26.5) | 5.0 (4.6-5.3)    | 26.4 (25.6-27.0) |
| <b>Current daily dose, mg</b>                    |                     |                  |                  |                  |                  |
| Non-use                                          | 112.3 (110.7-113.8) | 16.8 (16.2-17.4) | 17.7 (17.1-18.4) | 3.3 (3.1- 3.6)   | 18.1 (17.4-18.7) |
| >0-4.9                                           | 214.0 (209.7-218.3) | 37.2 (35.1-39.4) | 37.4 (35.3-39.7) | 6.6 (5.7- 7.6)   | 38.9 (36.8-41.2) |
| 5.0-14.9                                         | 254.5 (250.5-258.4) | 39.1 (37.3-41.1) | 43.5 (41.5-45.6) | 8.5 (7.6- 9.5)   | 43.0 (41.0-45.1) |
| 15.0-24.9                                        | 350.1 (338.5-361.3) | 52.3 (47.1-58.1) | 54.9 (49.5-60.7) | 13.0 (10.3-16.1) | 57.9 (52.3-63.8) |
| ≥25                                              | 304.4 (291.7-316.6) | 51.8 (45.7-58.6) | 47.3 (41.1-54.0) | 11.6 (8.6-15.2)  | 51.0 (44.6-58.1) |
| <b>Cumulative dose in last year, mg</b>          |                     |                  |                  |                  |                  |
| Non-use                                          | 101.0 (99.4-102.6)  | 15.1 (14.5-15.8) | 15.8 (15.1-16.5) | 2.8 (2.5- 3.1)   | 16.0 (15.4-16.7) |
| >0-959.9                                         | 199.4 (195.3-203.4) | 29.5 (27.8-31.4) | 32.0 (30.2-34.0) | 6.2 (5.4- 7.1)   | 33.2 (31.4-35.2) |
| 960-3,054.9                                      | 250.1 (246.6-253.7) | 40.8 (39.1-42.6) | 43.1 (41.3-45.0) | 8.8 (7.9- 9.7)   | 44.7 (42.8-46.6) |
| ≥3,055                                           | 312.6 (305.5-319.7) | 55.9 (52.1-60.0) | 58.1 (54.2-62.3) | 12.0 (10.2-14.1) | 54.5 (50.6-58.5) |
| <b>Total cumulative dose, mg</b>                 |                     |                  |                  |                  |                  |
| Non-use                                          | 201.4 (196.6-206.2) | 29.5 (27.3-31.8) | 34.5 (32.1-37.0) | 7.2 (6.1-8.5)    | 35.3 (32.9-37.8) |
| >0-959.9                                         | 223.3 (218.1-228.4) | 30.9 (28.7-33.3) | 36.3 (33.9-38.8) | 7.6 (6.5-8.8)    | 36.6 (34.1-39.1) |
| 960-3,054.9                                      | 219.4 (215.8-223.1) | 32.9 (31.2-34.6) | 34.6 (32.9-36.4) | 7.1 (6.4-8.0)    | 39.2 (37.4-41.1) |
| 3,055-7,299.9                                    | 155.7 (153.2-158.3) | 24.9 (23.7-26.2) | 27.5 (26.2-28.8) | 5.1 (4.5-5.7)    | 27.2 (25.9-28.5) |
| ≥7,300                                           | 91.0 (89.0- 93.0)   | 17.1 (16.2-17.9) | 15.2 (14.4-16.1) | 2.7 (2.3-3.0)    | 14.1 (13.3-14.9) |

Note: CI, confidence interval; IQR, interquartile range. Estimates are shown for time-variant prednisolone-equivalent dosage.

**Supplemental Table 6. Distribution of patients according to the type of infections diagnosed**

| Type of infection                       | N (%)        |
|-----------------------------------------|--------------|
| <b><i>All-cause infection</i></b>       | 22,234       |
| Chest infection                         | 3,148 (14.2) |
| Pneumonia                               | 2,916 (13.1) |
| Conjunctivitis                          | 1,905 (8.6)  |
| H. Zoster                               | 1,642 (7.4)  |
| Abscess                                 | 1,619 (7.3)  |
| Sinusitis                               | 1,235 (5.6)  |
| Gastroenteritis                         | 1,171 (5.3)  |
| Candidiasis                             | 854 (3.8)    |
| Urinary tract infection                 | 840 (3.8)    |
| Septicaemia                             | 701 (3.2)    |
| Infections without location specified   | 4,643 (20.9) |
| Other infections                        | 1,176 (5.3)  |
| <b>Bacterial infection</b>              | 5,234        |
| Pneumonia                               | 2,077 (39.7) |
| Chest infection with antibiotics        | 1,789 (34.2) |
| Gastroenteritis                         | 617 (11.8)   |
| Respiratory infections with antibiotics | 192 (3.7)    |
| Cellulitis                              | 174 (3.3)    |
| Urinary tract infection                 | 145 (2.8)    |
| Otitis                                  | 103 (2.0)    |
| Tuberculosis                            | 50 (1.0)     |
| Sepsis                                  | 22 (0.4)     |
| Meningitis                              | 15 (0.3)     |
| Other bacterial infection               | 42 (1.0)     |
| <b>Viral infection</b>                  | 5,344        |
| Pneumonia                               | 734 (13.7)   |
| Gastroenteritis                         | 668 (12.5)   |
| Influenza                               | 200 (3.7)    |
| Sepsis                                  | 183 (3.4)    |
| H. Zoster                               | 11 (0.2)     |

|                                                        |              |
|--------------------------------------------------------|--------------|
| Meningitis                                             | 8 (0.2)      |
| Bacterial pathogen isolated without location specified | 3,523 (65.9) |
| Other                                                  | 17 (0.4)     |
| <b><i>Parasitic infection</i></b>                      | 1,120        |
| Pneumonia                                              | 152 (13.6)   |
| Gastroenteritis                                        | 83 (7.4)     |
| Sepsis                                                 | 31 (2.8)     |
| Parasitic pathogen isolated without location specified | 854 (76.3)   |
| <b><i>Fungal infection</i></b>                         |              |
| Candidiasis                                            | 1,314 (24.3) |
| Pneumonia                                              | 486 (9.0)    |
| Gastroenteritis                                        | 330 (6.1)    |
| Sepsis                                                 | 134 (2.5)    |
| Chest infection                                        | 21 (0.4)     |
| Fungal pathogen isolated without location specified    | 3,109 (57.4) |
| Other                                                  | 22 (0.4)     |

---

Note: Overall, 68% of patients with all-cause infection (primary outcome) were treated with an antibiotic in primary care or hospitalised within 7 days (71% of bacterial infections); 34% of patients with viral infections and 27% of those with fungal infections were hospitalised within 7 days.



**Supplemental Table 7. Kaplan-Meier estimates of infections per level of current daily and cumulative oral glucocorticoid prednisolone-equivalent dose in men and women**

|                                                   | Men                 |                     |                     |                   |                     | Women               |                     |                     |                  |                     |
|---------------------------------------------------|---------------------|---------------------|---------------------|-------------------|---------------------|---------------------|---------------------|---------------------|------------------|---------------------|
|                                                   | All-cause           | Bacterial           | Viral               | Parasitic         | Fungal              | All-cause           | Bacterial           | Viral               | Parasitic        | Fungal              |
| <b>Incident infections, n (%)</b>                 | 6527                | 1652                | 1388                | 333               | 1579                | 1,5707              | 3,582               | 3,956               | 787              | 3,837               |
| <b>Cumulative probability (95% CI) at 1 year</b>  | 16.7<br>(16.0-17.4) | 3.3<br>(3.0-3.6)    | 3.2<br>(2.9-3.6)    | 0.9<br>(0.7-1.0)  | 3.4<br>(3.1-3.7)    | 19.0<br>(18.5-19.5) | 3.1<br>(2.9-3.3)    | 4.0<br>(3.8-4.2)    | 0.9<br>(0.8-1.1) | 4.1<br>(3.9-4.4)    |
| <b>Current daily dose, mg</b>                     |                     |                     |                     |                   |                     |                     |                     |                     |                  |                     |
| nonuse                                            | 10.8<br>(9.9-11.7)  | 2.1<br>(1.7-2.5)    | 2.0<br>(1.6-2.4)    | 0.7<br>(0.4-0.9)  | 2.0<br>(1.6-2.4)    | 13.8<br>(13.1-14.5) | 2.1<br>(1.8-2.3)    | 2.6<br>(2.3-2.9)    | 0.6<br>(0.4-0.7) | 2.6<br>(2.3-2.9)    |
| >0-4.9                                            | 16.0<br>(14.5-17.4) | 3.5<br>(2.8-4.2)    | 3.1<br>(2.4-3.8)    | 0.8<br>(0.4-1.1)  | 3.4<br>(2.6-4.1)    | 18.9<br>(17.8-19.9) | 3.4<br>(2.9-3.9)    | 3.8<br>(3.3-4.3)    | 0.8<br>(0.6-1.1) | 4.3<br>(3.8-4.9)    |
| 5.0-14.9                                          | 19.9<br>(18.7-21.2) | 3.6<br>(3.0-4.2)    | 4.0<br>(3.4-4.7)    | 1.0<br>(0.7-1.3)  | 4.1<br>(3.5-4.7)    | 21.6<br>(20.7-22.5) | 3.4<br>(3.0-3.8)    | 4.9<br>(4.4-5.4)    | 1.2<br>(1.0-1.4) | 5.0<br>(4.5-5.5)    |
| 15.0-24.9                                         | 29.7<br>(26.4-32.8) | 7.5<br>(5.5-9.4)    | 6.5<br>(4.7-8.4)    | 1.3<br>(0.5-2.2)  | 7.1<br>(5.2-8.9)    | 30.7<br>(28.4-32.9) | 5.8<br>(4.6-7.0)    | 7.6<br>(6.2-8.9)    | 2.3<br>(1.5-3.0) | 7.5<br>(6.1-8.8)    |
| ≥25.0                                             | 32.8<br>(27.7-37.5) | 7.8<br>(4.7-10.7)   | 5.8<br>(3.2-8.4)    | 2.3<br>(0.6-4.0)  | 8.2<br>(5.1-11.2)   | 37.3<br>(33.7-40.8) | 8.0<br>(5.9-10.1)   | 9.0<br>(6.7-11.2)   | 1.9<br>(0.8-3.0) | 8.7<br>(6.4-10.9)   |
| <b>Cumulative dose in last year, mg</b>           |                     |                     |                     |                   |                     |                     |                     |                     |                  |                     |
| nonuse                                            | 4.2<br>(3.8-4.6)    | 0.7<br>(0.6-0.9)    | 0.7<br>(0.5-0.9)    | 0.2<br>(0.1-0.3)  | 0.6<br>(0.5-0.8)    | 5.5<br>(5.1-5.8)    | 0.7<br>(0.6-0.8)    | 0.8<br>(0.7-1.0)    | 0.2<br>(0.1-0.2) | 0.9<br>(0.8-1.1)    |
| >0-959.9                                          | 36.7<br>(33.8-39.4) | 9.2<br>(7.0-11.3)   | 11.8<br>(9.4-14.2)  | 2.8<br>(1.5-4.1)  | 13.1<br>(10.6-15.5) | 39.9<br>(38.0-41.7) | 12.4<br>(10.7-14.0) | 14.8<br>(13.0-16.5) | 4.0<br>(2.9-5.0) | 12.9<br>(11.2-14.5) |
| 960.0-3,054.9                                     | 46.6<br>(44.3-48.9) | 17.6<br>(15.3-20.0) | 14.6<br>(12.3-16.7) | 4.2<br>(2.8-5.4)  | 16.1<br>(13.8-18.3) | 50.3<br>(48.7-51.8) | 16.9<br>(15.2-18.5) | 20.4<br>(18.6-22.1) | 6.4<br>(5.2-7.5) | 22.3<br>(20.5-24.0) |
| ≥3,055.0                                          | 55.1<br>(50.8-59.1) | 22.4<br>(17.2-27.3) | 23.1<br>(18.0-27.8) | 9.0<br>(5.1-12.8) | 21.7<br>(16.5-26.5) | 62.5<br>(59.7-65.1) | 23.7<br>(19.8-27.4) | 27.0<br>(23.3-30.6) | 7.3<br>(5.0-9.6) | 25.7<br>(21.9-29.4) |
| <b>Total cumulative dose, mg</b>                  |                     |                     |                     |                   |                     |                     |                     |                     |                  |                     |
| nonuse                                            | 19.0<br>(17.1-20.8) | 3.9<br>(2.9-4.8)    | 3.9<br>(3.0-4.9)    | 1.4<br>(0.8-2.0)  | 3.7<br>(2.8-4.6)    | 21.2<br>(20.0-22.4) | 3.4<br>(2.8-3.9)    | 4.0<br>(3.4-4.6)    | 0.9<br>(0.6-1.2) | 4.6<br>(4.0-5.2)    |
| >0-959.9                                          | 28.2<br>(25.9-30.5) | 5.1<br>(3.9-6.3)    | 6.0<br>(4.7-7.2)    | 1.4<br>(0.7-2.0)  | 7.1<br>(5.7-8.5)    | 29.3<br>(27.8-30.8) | 5.5<br>(4.7-6.2)    | 7.3<br>(6.4-8.2)    | 1.7<br>(1.2-2.1) | 6.4<br>(5.5-7.2)    |
| 960.0-3,054.9                                     | 20.2<br>(19.0-21.4) | 4.5<br>(3.8-5.1)    | 3.6<br>(3.0-4.2)    | 0.9<br>(0.6-1.2)  | 4.1<br>(3.5-4.8)    | 22.7<br>(21.8-23.5) | 3.8<br>(3.4-4.2)    | 5.0<br>(4.5-5.4)    | 1.3<br>(1.0-1.5) | 5.7<br>(5.2-6.2)    |
| 3,055.0-7,299.9                                   | 8.9<br>(8.1-9.8)    | 1.7<br>(1.3-2.0)    | 2.0<br>(1.5-2.4)    | 0.5<br>(0.3-0.7)  | 1.7<br>(1.3-2.1)    | 10.8<br>(10.2-11.5) | 1.8<br>(1.5-2.1)    | 2.2<br>(1.9-2.5)    | 0.5<br>(0.4-0.7) | 1.9<br>(1.6-2.2)    |
| ≥7,300.0                                          | 6.5<br>(4.0-9.0)    | 1.2<br>(0.1-2.2)    | 1.6<br>(0.4-2.8)    | 0.9<br>(0.0-1.8)  | 0.9<br>(0.0-1.8)    | 7.8<br>(6.1-9.5)    | 0.4<br>(0.1-0.8)    | 1.1<br>(0.5-1.7)    | 0.3<br>(0.0-0.5) | 1.6<br>(0.9-2.3)    |
| <b>Cumulative probability (95% CI) at 5 years</b> | 52.2                | 12.3                | 11.3                | 2.7               | 13.4                | 55.8                | 11.3                | 13.9                | 2.8              | 13.8                |

|                                                    |                     |                     |                     |                     |                     |                     |                     |                     |                    |                     |
|----------------------------------------------------|---------------------|---------------------|---------------------|---------------------|---------------------|---------------------|---------------------|---------------------|--------------------|---------------------|
|                                                    | (51.2-53.3)         | (11.6-13.0)         | (10.7-12.0)         | (2.4-3.1)           | (12.7-14.1)         | (55.1-56.4)         | (10.8-11.7)         | (13.4-14.3)         | (2.6-3.0)          | (13.4-14.3)         |
| <b>Current daily dose, mg</b>                      |                     |                     |                     |                     |                     |                     |                     |                     |                    |                     |
| nonuse                                             | 38.3<br>(36.9-39.6) | 8.1<br>(7.4- 8.8)   | 7.3<br>(6.6- 7.9)   | 1.9<br>(1.5- 2.2)   | 9.0<br>(8.3- 9.8)   | 43.8<br>(42.9-44.8) | 7.3<br>(6.8- 7.8)   | 9.5<br>(9.0-10.1)   | 1.8<br>(1.6-2.1)   | 9.5<br>(9.0-10.1)   |
| >0-4.9                                             | 66.3<br>(63.6-68.9) | 20.1<br>(17.7-22.5) | 16.8<br>(14.6-19.0) | 3.3<br>( 2.3- 4.4)  | 20.0<br>(17.5-22.3) | 64.5<br>(62.8-66.1) | 15.7<br>(14.4-17.0) | 18.0<br>(16.5-19.4) | 3.3<br>(2.6-3.9)   | 18.0<br>(16.6-19.4) |
| 5.0-14.9                                           | 69.4<br>(67.2-71.4) | 17.6<br>(15.6-19.5) | 18.4<br>(16.4-20.4) | 4.3<br>(3.3- 5.3)   | 19.4<br>(17.4-21.4) | 70.0<br>(68.7-71.3) | 17.6<br>(16.4-18.8) | 21.1<br>(19.8-22.4) | 4.6<br>(3.9-5.3)   | 20.9<br>(19.6-22.2) |
| 15.0-24.9                                          | 79.4<br>(74.9-83.2) | 27.7<br>(21.8-33.0) | 23.9<br>(18.5-29.0) | 6.6<br>(3.4- 9.7)   | 31.5<br>(25.2-37.2) | 77.2<br>(74.1-79.9) | 22.1<br>(18.7-25.3) | 24.9<br>(21.5-28.2) | 6.4<br>(4.5-8.2)   | 26.2<br>(22.6-29.6) |
| ≥25.0                                              | 81.4<br>(74.8-86.3) | 31.5<br>(22.5-39.5) | 27.5<br>(18.9-35.2) | 9.0<br>(3.5-14.2)   | 31.0<br>(23.0-38.1) | 81.5<br>(77.6-84.8) | 27.2<br>(22.1-31.9) | 27.5<br>(22.3-32.4) | 6.4<br>(3.6-9.2)   | 24.8<br>(20.0-29.3) |
| <b>Cumulative dose in last year, mg</b>            |                     |                     |                     |                     |                     |                     |                     |                     |                    |                     |
| nonuse                                             | 30.0<br>(28.7-31.3) | 5.5<br>( 4.9- 6.1)  | 4.9<br>( 4.4- 5.4)  | 1.3<br>( 1.0- 1.6)  | 6.0<br>( 5.4- 6.6)  | 33.7<br>(32.8-34.6) | 4.7<br>( 4.3- 5.0)  | 6.3<br>( 5.9- 6.7)  | 1.1<br>( 0.9- 1.2) | 6.4<br>( 6.0- 6.8)  |
| >0-959.9                                           | 72.9<br>(69.9-75.6) | 25.9<br>(22.3-29.5) | 24.4<br>(20.9-27.8) | 5.2<br>( 3.3- 6.9)  | 28.6<br>(25.1-32.0) | 75.7<br>(73.9-77.3) | 23.2<br>(21.0-25.3) | 26.9<br>(24.6-29.1) | 5.6<br>( 4.5- 6.7) | 25.9<br>(23.7-28.0) |
| 960.0-3,054.9                                      | 84.7<br>(82.7-86.5) | 32.4<br>(29.0-35.7) | 31.0<br>(27.5-34.3) | 7.8<br>( 5.7- 9.9)  | 36.5<br>(32.9-40.0) | 84.3<br>(83.1-85.5) | 33.4<br>(31.1-35.6) | 36.6<br>(34.3-38.9) | 9.7<br>( 8.2-11.3) | 37.1<br>(34.8-39.3) |
| ≥3,055.0                                           | 93.2<br>(89.8-95.5) | 52.8<br>(43.1-60.9) | 45.3<br>(35.0-54.0) | 10.2<br>( 6.1-14.0) | 44.7<br>(35.0-52.9) | 92.4<br>(90.5-94.0) | 49.4<br>(43.6-54.5) | 48.9<br>(43.5-53.8) | 14.7<br>(10.1-9.0) | 45.6<br>(40.3-50.4) |
| <b>Total cumulative dose, mg</b>                   |                     |                     |                     |                     |                     |                     |                     |                     |                    |                     |
| nonuse                                             | 54.8<br>(51.8-57.7) | 13.5<br>(11.3-15.6) | 11.1<br>(9.1-13.0)  | 3.4<br>(2.3-4.5)    | 14.4<br>(12.1-16.7) | 60.2<br>(58.3-62.0) | 11.9<br>(10.6-13.2) | 15.6<br>(14.1-17.0) | 3.3<br>(2.6-4.1)   | 16.0<br>(14.6-17.5) |
| >0-959.9                                           | 59.3<br>(56.2-62.2) | 15.6<br>(13.1-18.0) | 14.1<br>(11.8-16.3) | 3.9<br>(2.6-5.2)    | 17.6<br>(15.2-20.0) | 63.7<br>(61.7-65.5) | 13.7<br>(12.3-15.1) | 18.4<br>(16.8-20.0) | 3.9<br>(3.1-4.6)   | 17.1<br>(15.6-18.7) |
| 960.0-3,054.9                                      | 57.7<br>(55.6-59.6) | 15.5<br>(13.9-17.1) | 13.2<br>(11.7-14.7) | 3.4<br>(2.6-4.2)    | 16.7<br>(15.0-18.3) | 63.6<br>(62.2-64.9) | 14.1<br>(13.0-15.1) | 17.4<br>(16.3-18.6) | 3.7<br>(3.1-4.2)   | 18.7<br>(17.5-19.8) |
| 3,055.0-7,299.9                                    | 52.9<br>(51.0-54.7) | 11.8<br>(10.6-13.0) | 12.4<br>(11.2-13.7) | 3.0<br>(2.4-3.7)    | 13.8<br>(12.4-15.1) | 56.3<br>(55.0-57.5) | 11.9<br>(11.0-12.7) | 14.3<br>(13.4-15.2) | 2.6<br>(2.2-3.1)   | 13.8<br>(12.9-14.7) |
| ≥7,300.0                                           | 35.9<br>(33.6-38.2) | 7.8<br>( 6.6- 8.9)  | 6.7<br>( 5.6- 7.8)  | 1.0<br>(0.6-1.4)    | 7.5<br>( 6.4- 8.7)  | 36.1<br>(34.6-37.6) | 7.0<br>(6.3- 7.7)   | 7.7<br>( 7.0- 8.4)  | 1.6<br>(1.2-1.9)   | 7.4<br>( 6.7- 8.1)  |
| <b>Cumulative probability (95% CI) at 10 years</b> | 75.1<br>(73.9-76.2) | 22.7<br>(21.5-23.8) | 18.3<br>(17.3-19.4) | 4.2<br>(3.7-4.8)    | 20.9<br>(19.8-22.0) | 77.7<br>(76.9-78.4) | 20.4<br>(19.6-21.1) | 22.4<br>(21.7-23.1) | 4.2<br>(3.9-4.6)   | 21.4<br>(20.7-22.1) |
| <b>Current daily dose, mg</b>                      |                     |                     |                     |                     |                     |                     |                     |                     |                    |                     |
| nonuse                                             | 65.4<br>(63.6-67.1) | 16.7<br>(15.4-18.0) | 13.7<br>(12.6-14.9) | 3.2<br>(2.7- 3.8)   | 16.1<br>(14.9-17.3) | 69.2<br>(68.0-70.2) | 15.2<br>(14.4-16.0) | 16.9<br>(16.0-17.7) | 2.9<br>(2.6- 3.2)  | 16.3<br>(15.5-17.1) |
| >0-4.9                                             | 84.9<br>(81.9-87.4) | 33.9<br>(29.8-37.8) | 23.7<br>(20.2-27.0) | 4.5<br>(3.1- 5.9)   | 29.5<br>(25.7-33.1) | 84.2<br>(82.4-85.8) | 27.3<br>(25.1-29.5) | 29.4<br>(27.1-31.6) | 5.6<br>(4.5- 6.7)  | 28.2<br>(26.0-30.4) |
| 5.0-14.9                                           | 88.1<br>(85.9-90.0) | 32.2<br>(28.6-35.6) | 27.5<br>(24.4-30.5) | 6.8<br>(4.9- 8.6)   | 27.8<br>(24.6-30.8) | 88.9<br>(87.6-90.1) | 30.0<br>(27.9-32.0) | 32.3<br>(30.1-34.3) | 6.8<br>(5.7- 7.9)  | 30.1<br>(28.1-32.0) |

|                                         |                     |                     |                     |                    |                     |                     |                     |                     |                    |                     |
|-----------------------------------------|---------------------|---------------------|---------------------|--------------------|---------------------|---------------------|---------------------|---------------------|--------------------|---------------------|
| 15.0-24.9                               | 92.7<br>(88.1-95.6) | 41.6<br>(32.1-49.9) | 40.3<br>(29.9-49.2) | 9.9<br>(3.2-16.0)  | 37.5<br>(29.6-44.6) | 92.2<br>(89.1-94.4) | 33.5<br>(28.0-38.5) | 37.3<br>(31.6-42.6) | 9.6<br>(6.3-12.7)  | 35.5<br>(30.4-40.3) |
| ≥25.0                                   | 89.7<br>(82.8-93.8) | 46.9<br>(33.1-57.9) | 24.7<br>(17.3-31.5) | 7.5<br>(3.1-11.8)  | 33.9<br>(24.6-42.0) | 94.6<br>(91.1-96.7) | 44.5<br>(35.2-52.6) | 47.2<br>(37.6-55.3) | 14.4<br>(7.3-21.0) | 39.4<br>(30.6-47.1) |
| <b>Cumulative dose in last year, mg</b> |                     |                     |                     |                    |                     |                     |                     |                     |                    |                     |
| nonuse                                  | 60.0<br>(58.1-61.8) | 13.8<br>(12.6-14.9) | 11.4<br>(10.3-12.4) | 2.5<br>(2.1- 3.0)  | 12.9<br>(11.8-14.1) | 63.7<br>(62.5-64.8) | 12.3<br>(11.6-13.0) | 13.8<br>(13.1-14.5) | 2.2<br>(1.9- 2.5)  | 13.5<br>(12.8-14.2) |
| >0-959.9                                | 86.9<br>(83.5-89.5) | 37.3<br>(31.9-42.4) | 26.3<br>(21.9-30.5) | 6.8<br>(4.1- 9.5)  | 35.8<br>(30.5-40.7) | 89.4<br>(87.6-91.0) | 31.3<br>(28.2-34.3) | 35.8<br>(32.4-38.9) | 6.6<br>(5.2- 8.0)  | 31.7<br>(28.8-34.6) |
| 960.0-3,054.9                           | 93.7<br>(91.8-95.3) | 46.7<br>(41.0-51.8) | 34.6<br>(30.0-39.0) | 9.2<br>(5.9-12.3)  | 36.9<br>(32.4-41.1) | 92.8<br>(91.5-93.9) | 39.8<br>(36.7-42.7) | 42.6<br>(39.4-45.7) | 10.9<br>(8.8-13.0) | 38.2<br>(35.4-40.8) |
| ≥3,055.0                                | 96.5<br>(92.9-98.2) | 57.9<br>(44.7-67.9) | 49.1<br>(36.2-59.3) | 13.8<br>(2.9-23.4) | 43.4<br>(32.9-52.3) | 97.6<br>(95.6-98.6) | 53.0<br>(46.1-59.0) | 51.5<br>(43.0-58.7) | 8.9<br>(6.6-11.0)  | 48.9<br>(40.4-56.2) |
| <b>Total cumulative dose, mg</b>        |                     |                     |                     |                    |                     |                     |                     |                     |                    |                     |
| nonuse                                  | 76.2<br>(72.6-79.3) | 22.4<br>(18.7-26.0) | 18.5<br>(15.3-21.7) | 4.2<br>(2.8-5.7)   | 19.5<br>(16.3-22.6) | 80.4<br>(78.4-82.3) | 22.2<br>(19.8-24.5) | 25.3<br>(23.0-27.5) | 5.6<br>(4.3-6.8)   | 24.6<br>(22.4-26.8) |
| >0-959.9                                | 79.3<br>(75.8-82.3) | 26.0<br>(22.1-29.8) | 20.0<br>(16.6-23.3) | 6.7<br>(4.4-9.0)   | 26.3<br>(22.6-29.8) | 83.4<br>(81.3-85.2) | 21.3<br>(19.2-23.4) | 28.0<br>(25.5-30.4) | 5.5<br>(4.3-6.6)   | 26.1<br>(23.7-28.4) |
| 9,60.0-3,054.9                          | 78.1<br>(75.6-80.3) | 26.3<br>(23.6-29.0) | 18.8<br>(16.6-21.0) | 5.2<br>(3.9-6.5)   | 25.3<br>(22.6-27.9) | 82.7<br>(81.2-84.1) | 23.2<br>(21.5-24.9) | 25.9<br>(24.2-27.6) | 5.2<br>(4.4-6.0)   | 26.4<br>(24.7-28.1) |
| 3,055.0-7,299.9                         | 74.2<br>(72.0-76.3) | 21.2<br>(19.1-23.3) | 20.7<br>(18.7-22.7) | 4.5<br>(3.5-5.4)   | 21.7<br>(19.6-23.8) | 76.9<br>(75.5-78.3) | 20.9<br>(19.5-22.3) | 22.0<br>(20.6-23.3) | 3.8<br>(3.2-4.4)   | 21.5<br>(20.1-22.8) |
| ≥7,300.0                                | 68.0<br>(65.1-70.6) | 19.5<br>(17.4-21.6) | 14.0<br>(12.2-15.8) | 2.5<br>(1.7-3.3)   | 14.8<br>(13.0-16.7) | 67.2<br>(65.4-68.9) | 16.6<br>(15.4-17.7) | 16.9<br>(15.7-18.1) | 3.0<br>(2.5-3.6)   | 14.8<br>(13.7-15.9) |

Note: CI, confidence interval; IQR, interquartile range. Estimates are shown for time-variant prednisolone-equivalent dosage.

**Supplemental Table 8. Secondary analysis for the association between time variant prescribed oral glucocorticoids and incident infections for patients with incident polymyalgia and/or giant cell arteritis (people with disease diagnosed before the start of follow-up were excluded)**

|                                                                 | <b>Hazard ratio with 95% CI*</b> |                             |                         |                             |                          |
|-----------------------------------------------------------------|----------------------------------|-----------------------------|-------------------------|-----------------------------|--------------------------|
|                                                                 | <b>All-cause infection</b>       | <b>Bacterial infections</b> | <b>Viral infections</b> | <b>Parasitic infections</b> | <b>Fungal infections</b> |
| <b>Ever use</b> (ref = Not used since 1-year prior study entry) | 0.96 (0.90-1.02)                 | 1.03 (0.89-1.17)            | 0.94 (0.82-1.07)        | 0.97 (0.71-1.22)            | 1.12 (1.00-1.25)         |
| <b>Current use</b> (ref = non-use)                              | 1.52 (1.46-1.58)                 | 1.78 (1.65-1.92)            | 1.50 (1.4-1.62)         | 1.46 (1.24-1.72)            | 1.53 (1.42-1.64)         |
| <b>Current daily dose per 5 mg/day</b>                          | 1.12 (1.10-1.13)                 | 1.16 (1.13-1.19)            | 1.12 (1.09-1.14)        | 1.12 (1.06-1.17)            | 1.11 (1.09-1.14)         |
| <b>Current daily dose category, mg</b>                          |                                  |                             |                         |                             |                          |
| Non-use (ref)                                                   | 1.00                             | 1.00                        | 1.00                    | 1.00                        | 1.00                     |
| >0-4.9                                                          | 1.44 (1.37-1.52)                 | 1.66 (1.46-1.9)             | 1.46 (1.31-1.64)        | 1.4 (1.09-1.79)             | 1.52 (1.37-1.69)         |
| 5.0-14.9                                                        | 1.49 (1.42-1.56)                 | 1.74 (1.56-1.93)            | 1.43 (1.29-1.58)        | 1.37 (1.11-1.69)            | 1.44 (1.32-1.58)         |
| 15.0-24.9                                                       | 1.69 (1.54-1.85)                 | 2.02 (1.73-2.36)            | 1.72 (1.48-2.00)        | 1.78 (1.24-2.54)            | 1.65 (1.43-1.92)         |
| ≥25                                                             | 2.22 (2.03-2.43)                 | 2.87 (2.31-3.58)            | 2.24 (1.82-2.77)        | 2.25 (1.50-3.36)            | 2.26 (1.85-2.75)         |
| <b>Cumulative dose in last year (per 1000 mg)</b>               | 1.66 (1.62-1.69)                 | 1.88 (1.85-1.91)            | 1.87 (1.84-1.89)        | 2.00 (1.94-2.07)            | 1.96 (1.94-1.99)         |
| <b>Cumulative dose in last year category, mg</b>                |                                  |                             |                         |                             |                          |
| Non-use (ref)                                                   | 1.00                             | 1.00                        | 1.00                    | 1.00                        | 1.00                     |
| >0-959.9                                                        | 2.19 (2.09-2.30)                 | 2.00 (1.82-2.21)            | 2.06 (1.87-2.26)        | 2.19 (1.77-2.70)            | 2.17 (1.98-2.37)         |
| 960-3,054.9                                                     | 2.85 (2.74-2.97)                 | 2.96 (2.72-3.21)            | 2.74 (2.53-2.97)        | 3.08 (2.57-3.69)            | 3.05 (2.82-3.00)         |
| ≥3,055                                                          | 3.39 (3.21-3.58)                 | 3.91 (3.49-4.39)            | 3.82 (3.43-4.25)        | 4.18 (3.31-5.29)            | 3.59 (3.22-4.00)         |
| <b>Total cumulative dose (per 1000 mg)</b>                      | 1.01 (1.00-1.01)                 | 1.02 (1.01-1.02)            | 1.01 (1.00-1.01)        | 1.01 (1.00-1.03)            | 1.01 (1.00-1.01)         |
| <b>Total cumulative dose category, mg</b>                       |                                  |                             |                         |                             |                          |
| Non-use (ref)                                                   | 1.00                             | 1.00                        | 1.00                    | 1.00                        | 1.00                     |
| >0-959.9                                                        | 1.01 (0.94-1.08)                 | 1.05 (0.89-1.23)            | 1.00 (0.87-1.15)        | 0.92 (0.69-1.23)            | 1.06 (0.92-1.22)         |
| 960-3,054.9                                                     | 0.91 (0.86-0.97)                 | 1.03 (0.89-1.20)            | 0.80 (0.70-0.91)        | 0.81 (0.62-1.06)            | 1.05 (0.92-1.19)         |
| 3,055-7,299.9                                                   | 0.95 (0.89-1.01)                 | 1.02 (0.88-1.18)            | 0.91 (0.80-1.03)        | 0.90 (0.69-1.19)            | 1.03 (0.90-1.17)         |
| ≥7,300                                                          | 1.04 (0.96-1.11)                 | 1.33 (1.14-1.56)            | 0.98 (0.85-1.12)        | 1.01 (0.74-1.37)            | 1.07 (0.93-1.23)         |

Note: CI, confidence interval; IQR, interquartile range. Estimates are shown for time-variant prednisolone-equivalent dosage. Hazard ratios from Cox proportional models adjusted for baseline age, sex, index of multiple deprivation, smoking status, ethnicity, BMI, disease type, comorbidities (CVD, diabetes, HIV, cancer, asthma, COPD, and

renal disease), prescribed non-oral glucocorticoids, proton pump inhibitors and H2 antagonists; and time-variant use of DMARDs and NSAIDs; practice ID was included as a random intercept to account for clustering effect.

**Supplemental Table 9. Kaplan-Meier estimates of infections per level of current daily and cumulative oral glucocorticoid prednisolone-equivalent dose by age group**

| All-cause infection                                | Age group        |                  |                  |
|----------------------------------------------------|------------------|------------------|------------------|
|                                                    | <60 years        | 60-74 years      | ≥75 years        |
| Incident infections, n (%)                         | 2,401            | 8,988            | 10,845           |
| <b>Cumulative probability (95% CI) at 1 year</b>   | 18.4 (17.2-19.5) | 16.4 (15.8-17.0) | 19.9 (19.3-20.5) |
| <b>Current daily dose, mg</b>                      |                  |                  |                  |
| nonuse (ref)                                       | 13.8 (12.4-15.3) | 11.2 (10.4-12.0) | 14.0 (13.1-14.8) |
| >0-4.9                                             | 19.3 (16.2-22.4) | 16.0 (14.7-17.2) | 19.4 (18.2-20.7) |
| 5.0-14.9                                           | 22.6 (19.9-25.2) | 18.6 (17.5-19.6) | 23.0 (21.9-24.1) |
| 15.0-24.9                                          | 29.6 (23.3-35.3) | 26.4 (23.7-29.1) | 34.1 (31.3-36.8) |
| ≥25.0 mg                                           | 43.2 (33.1-51.7) | 33.7 (29.3-37.8) | 36.3 (31.9-40.4) |
| <b>Cumulative dose in last year, mg</b>            |                  |                  |                  |
| nonuse (ref)                                       | 7.2 (6.3- 8.1)   | 3.9 (3.5- 4.2)   | 5.6 (5.2- 6.0)   |
| >0-959.9                                           | 49.8 (44.1-54.9) | 37.8 (35.2-40.3) | 38.0 (35.9-40.1) |
| 960.0-3,054.9                                      | 53.1 (48.2-57.5) | 49.7 (47.6-51.8) | 48.3 (46.5-50.0) |
| ≥3,055.0                                           | 66.3 (58.0-73.0) | 58.1 (54.4-61.5) | 60.8 (57.5-63.9) |
| <b>Total cumulative dose, mg</b>                   |                  |                  |                  |
| nonuse (ref)                                       | 19.7 (17.3-22.0) | 18.8 (17.1-20.5) | 22.3 (20.7-23.8) |
| >0-959.9                                           | 26.2 (22.7-29.5) | 27.8 (25.7-29.8) | 30.7 (28.9-32.5) |
| 960.0-3,054.9                                      | 21.1 (18.7-23.4) | 20.3 (19.2-21.4) | 23.3 (22.3-24.3) |
| 3,055.0-7,299.9                                    | 10.1 (8.3-11.8)  | 8.8 (8.0- 9.5)   | 11.6 (10.8-12.4) |
| ≥7,300.0                                           | 12.0 (5.7-18.0)  | 7.3 (5.1- 9.4)   | 6.8 (4.8- 8.8)   |
| <b>Cumulative probability (95% CI) at 5 years</b>  | 53.7 (51.9-55.3) | 51.1 (50.2-51.9) | 58.2 (57.3-59.0) |
| <b>Current daily dose, mg</b>                      |                  |                  |                  |
| nonuse (ref)                                       | 45.1 (43.0-47.2) | 37.9 (36.8-39.1) | 45.1 (43.9-46.2) |
| >0-4.9                                             | 67.6 (62.2-72.2) | 61.2 (58.9-63.3) | 67.9 (65.8-69.8) |
| 5.0-14.9                                           | 70.1 (65.9-73.9) | 66.9 (65.1-68.6) | 72.3 (70.7-73.8) |
| 15.0-24.9                                          | 74.5 (65.4-81.2) | 74.8 (70.9-78.3) | 81.4 (77.8-84.5) |
| ≥25.0                                              | 80.9 (68.7-88.3) | 79.9 (75.0-83.9) | 83.5 (78.2-87.5) |
| <b>Cumulative dose in last year, mg</b>            |                  |                  |                  |
| nonuse (ref)                                       | 37.7 (35.6-39.7) | 28.2 (27.2-29.3) | 35.3 (34.1-36.4) |
| >0-959.9                                           | 83.8 (78.7-87.7) | 72.8 (70.3-75.1) | 74.9 (72.8-76.9) |
| 960.0-3,054.9                                      | 85.2 (81.2-88.4) | 83.7 (81.9-85.3) | 84.9 (83.4-86.2) |
| ≥3,055.0                                           | 95.0 (85.9-98.2) | 93.7 (91.2-95.4) | 91.3 (88.7-93.2) |
| <b>Total cumulative dose, mg</b>                   |                  |                  |                  |
| nonuse (ref)                                       | 58.0 (54.4-61.3) | 55.3 (52.6-57.8) | 61.9 (59.4-64.2) |
| >0-959.9                                           | 58.6 (54.2-62.6) | 59.3 (56.6-61.8) | 66.1 (63.8-68.3) |
| 960.0-3,054.9                                      | 55.1 (51.3-58.5) | 59.8 (58.0-61.5) | 64.5 (62.9-66.1) |
| 3,055.0-7,299.9                                    | 57.6 (53.9-61.1) | 51.7 (50.1-53.3) | 58.0 (56.4-59.5) |
| ≥7,300.0                                           | 33.6 (29.4-37.5) | 33.4 (31.6-35.2) | 39.5 (37.5-41.4) |
| <b>Cumulative probability (95% CI) at 10 years</b> | 72.8 (70.9-74.6) | 73.3 (72.3-74.2) | 81.8 (80.8-82.7) |
| <b>Current daily dose, mg</b>                      |                  |                  |                  |
| nonuse (ref)                                       | 66.2 (63.7-68.5) | 63.5 (62.0-64.9) | 73.7 (72.2-75.1) |
| >0-4.9                                             | 82.4 (76.7-86.7) | 81.5 (79.0-83.6) | 87.5 (85.3-89.4) |
| 5.0-14.9                                           | 85.2 (80.5-88.7) | 86.2 (84.4-87.8) | 91.8 (90.2-93.1) |
| 15.0-24.9                                          | 93.6 (83.4-97.5) | 90.1 (86.0-93.1) | 94.2 (90.6-96.4) |
| ≥25.0                                              | 95.3 (83.1-98.7) | 91.8 (86.9-94.8) | 93.8 (88.5-96.7) |
| <b>Cumulative dose in last year, mg</b>            |                  |                  |                  |
| nonuse (ref)                                       | 61.9 (59.3-64.4) | 57.1 (55.6-58.6) | 69.0 (67.4-70.6) |
| >0-959.9                                           | 87.1 (79.7-91.7) | 87.1 (84.7-89.2) | 90.4 (88.1-92.3) |
| 960.0-3,054.9                                      | 95.4 (91.2-97.6) | 91.1 (89.4-92.6) | 94.5 (92.9-95.7) |
| ≥3,055.0                                           | 97.3 (85.1-99.5) | 97.5 (94.9-98.7) | 96.9 (94.3-98.3) |
| <b>Total cumulative dose, mg</b>                   |                  |                  |                  |
| nonuse (ref)                                       | 75.0 (71.1-78.3) | 77.4 (74.5-79.9) | 84.3 (81.2-86.9) |

|                                                    |                     |                    |                  |
|----------------------------------------------------|---------------------|--------------------|------------------|
| >0-959.9                                           | 77.8 (72.9-81.9)    | 80.0 (77.2-82.5)   | 85.9 (83.1-88.2) |
| 960.0-3,054.9                                      | 73.8 (69.5-77.5)    | 79.3 (77.2-81.1)   | 84.8 (83.0-86.5) |
| 3,055.0-7,299.9                                    | 73.6 (69.3-77.3)    | 72.4 (70.6-74.1)   | 80.4 (78.6-82.1) |
| ≥7,300.0                                           | 61.5 (56.3-66.1)    | 63.0 (60.8-65.0)   | 74.4 (72.0-76.5) |
| <b>Bacterial infections</b>                        | <b>&lt;60 years</b> | <b>60-74 years</b> | <b>≥75 years</b> |
| Incident infections, n (%)                         | 417                 | 1,973              | 2,844            |
| <b>Cumulative probability (95% CI) at 1 year</b>   | 2.2 (1.7-2.6)       | 2.4 (2.1-2.6)      | 4.0 (3.8-4.3)    |
| <b>Current daily dose, mg</b>                      |                     |                    |                  |
| nonuse (ref)                                       | 1.2 (0.8- 1.7)      | 1.6 (1.3-1.9)      | 2.7 (2.3- 3.1)   |
| >0-4.9                                             | 3.2 (1.8- 4.6)      | 2.6 (2.0-3.1)      | 4.2 (3.6- 4.8)   |
| 5.0-14.9                                           | 3.2 (2.0- 4.3)      | 2.4 (1.9-2.8)      | 4.5 (3.9- 5.0)   |
| 15.0-24.9                                          | 4.1 (1.3- 6.8)      | 4.7 (3.3-6.0)      | 8.4 (6.6-10.0)   |
| ≥25.0                                              | 6.7 (1.4-11.8)      | 6.5 (4.1-8.9)      | 9.5 (6.7-12.3)   |
| <b>Cumulative dose in last year, mg</b>            |                     |                    |                  |
| nonuse (ref)                                       | 0.5 (0.3- 0.8)      | 0.4 (0.3- 0.5)     | 1.0 (0.8- 1.1)   |
| >0-959.9                                           | 11.8 (6.3-16.9)     | 10.4 (8.1-12.6)    | 11.9 (10.1-13.6) |
| 960.0-3,054.9                                      | 19.0 (13.2-24.5)    | 17.4 (14.9-19.8)   | 16.8 (15.1-18.5) |
| ≥3,055.0                                           | 28.4 (14.3-40.1)    | 22.4 (17.1-27.3)   | 23.2 (19.1-27.0) |
| <b>Total cumulative dose, mg</b>                   |                     |                    |                  |
| nonuse (ref)                                       | 1.8 (1.0-2.6)       | 2.7 (2.0-3.4)      | 4.9 (4.0-5.7)    |
| >0-959.9                                           | 2.8 (1.5-4.1)       | 4.3 (3.3-5.2)      | 6.9 (5.8-7.9)    |
| 960.0-3,054.9                                      | 3.2 (2.1-4.2)       | 3.2 (2.7-3.7)      | 4.8 (4.3-5.3)    |
| 3,055.0-7,299.9                                    | 1.5 (0.8-2.2)       | 1.2 (0.9-1.4)      | 2.4 (2.0-2.7)    |
| ≥7,300.0                                           | 0.8 (0.0-2.2)       | 0.7 (0.1-1.3)      | 0.6 (0.0-1.1)    |
| <b>Cumulative probability (95% CI) at 5 years</b>  | 7.5 (6.6-8.4)       | 9.3 (8.8-9.8)      | 14.8 (14.2-15.4) |
| <b>Current daily dose, mg</b>                      |                     |                    |                  |
| nonuse (ref)                                       | 5.2 (4.4- 6.1)      | 6.0 (5.5- 6.5)     | 9.9 (9.2-10.5)   |
| >0-4.9                                             | 13.9 (9.8-17.8)     | 14.2 (12.5-15.8)   | 19.8 (18.0-21.5) |
| 5.0-14.9                                           | 11.3 (8.2-14.3)     | 13.9 (12.4-15.3)   | 21.7 (20.0-23.3) |
| 15.0-24.9                                          | 20.2 (10.5-28.9)    | 19.2 (15.2-23.1)   | 28.5 (23.8-32.8) |
| ≥25.0                                              | 24.8 (11.6-36.1)    | 23.2 (17.3-28.6)   | 35.2 (27.5-42.2) |
| <b>Cumulative dose in last year, mg</b>            |                     |                    |                  |
| nonuse (ref)                                       | 4.0 (3.3- 4.8)      | 3.4 (3.1- 3.8)     | 6.8 (6.3- 7.4)   |
| >0-959.9                                           | 19.0 (12.1-25.2)    | 23.0 (19.9-25.9)   | 25.3 (22.7-27.8) |
| 960.0-3,054.9                                      | 29.4 (22.2-36.0)    | 32.5 (29.3-35.6)   | 33.9 (31.4-36.4) |
| ≥3,055.0                                           | 41.2 (19.5-57.1)    | 50.2 (42.6-56.9)   | 51.4 (44.5-57.4) |
| <b>Total cumulative dose, mg</b>                   |                     |                    |                  |
| nonuse (ref)                                       | 7.6 (5.6- 9.5)      | 9.0 (7.5-10.6)     | 17.5 (15.5-19.5) |
| >0-959.9                                           | 7.3 (5.0- 9.4)      | 12.4 (10.5-14.3)   | 18.1 (16.0-20.1) |
| 960.0-3,054.9                                      | 9.0 (6.9-11.1)      | 11.9 (10.7-13.2)   | 18.0 (16.6-19.4) |
| 3,055.0-7,299.9                                    | 8.8 (6.7-10.9)      | 9.5 (8.6-10.5)     | 14.6 (13.5-15.7) |
| ≥7,300.0                                           | 4.4 (2.9- 5.9)      | 6.1 (5.4- 6.9)     | 9.1 (8.1-10.1)   |
| <b>Cumulative probability (95% CI) at 10 years</b> | 13.8 (12.4-15.3)    | 17.4 (16.6-18.2)   | 27.5 (26.4-28.6) |
| <b>Current daily dose, mg</b>                      |                     |                    |                  |
| nonuse (ref)                                       | 10.9 (9.4-12.4)     | 12.7 (11.8-13.5)   | 21.3 (20.0-22.6) |
| >0-4.9                                             | 25.3 (18.6-31.4)    | 24.3 (21.7-26.8)   | 35.3 (31.8-38.6) |
| 5.0-14.9                                           | 15.7 (11.4-19.8)    | 25.6 (23.1-28.1)   | 38.7 (35.5-41.6) |
| 15.0-24.9                                          | 32.0 (17.8-43.7)    | 33.2 (26.4-39.4)   | 38.0 (30.6-44.5) |
| ≥25.0                                              | 62.8 (26.5-81.2)    | 39.1 (29.2-47.6)   | 48.7 (35.3-59.4) |
| <b>Cumulative dose in last year, mg</b>            |                     |                    |                  |
| nonuse (ref)                                       | 9.4 (8.0-10.7)      | 9.6 (8.8-10.4)     | 18.3 (17.1-19.5) |
| >0-959.9                                           | 29.0 (19.1-37.7)    | 29.2 (25.4-32.9)   | 37.5 (33.2-41.6) |
| 960.0-3,054.9                                      | 36.6 (25.5-46.1)    | 38.9 (34.9-42.6)   | 44.8 (40.7-48.7) |
| ≥3,055.0                                           | 33.8 (15.2-48.3)    | 54.8 (44.6-63.1)   | 57.6 (49.2-64.7) |
| <b>Total cumulative dose, mg</b>                   |                     |                    |                  |

|                                                    |                     |                    |                  |
|----------------------------------------------------|---------------------|--------------------|------------------|
| nonuse (ref)                                       | 15.3 (11.8-18.6)    | 16.8 (14.1-19.5)   | 33.8 (29.0-38.3) |
| >0-959.9                                           | 13.4 (9.6-17.1)     | 19.8 (17.0-22.5)   | 29.1 (25.6-32.5) |
| 960.0-3,054.9                                      | 16.2 (12.7-19.6)    | 19.7 (17.7-21.7)   | 31.0 (28.4-33.5) |
| 3,055.0-7,299.9                                    | 15.4 (12.0-18.7)    | 17.7 (16.1-19.2)   | 25.9 (23.8-27.9) |
| ≥7,300.0                                           | 9.7 (7.2-12.1)      | 14.9 (13.6-16.2)   | 23.0 (21.1-24.9) |
| <b>Viral infection</b>                             | <b>&lt;60 years</b> | <b>60-74 years</b> | <b>≥75 years</b> |
| Incident infections, n (%)                         | 670                 | 2,291              | 2,383            |
| <b>Cumulative probability (95% CI) at 1 year</b>   | 4.1 (3.5-4.8)       | 3.4 (3.1-3.7)      | 4.0 (3.7-4.3)    |
| <b>Current daily dose, mg</b>                      |                     |                    |                  |
| nonuse (ref)                                       | 3.1 (2.4-3.8)       | 2.2 (1.8-2.6)      | 2.5 (2.1-2.8)    |
| >0-4.9                                             | 3.6 (2.1-5.1)       | 3.2 (2.6-3.8)      | 3.9 (3.3-4.5)    |
| 5.0-14.9                                           | 5.2 (3.8-6.7)       | 4.3 (3.7-4.9)      | 4.8 (4.3-5.4)    |
| 15.0-24.9                                          | 10.4 (6.1-14.5)     | 5.6 (4.2-7.1)      | 8.2 (6.5-9.8)    |
| ≥25.0                                              | 9.7 (3.5-15.5)      | 5.7 (3.4-8.0)      | 9.7 (6.8-12.4)   |
| <b>Cumulative dose in last year, mg</b>            |                     |                    |                  |
| nonuse (ref)                                       | 1.5 (1.1-1.9)       | 0.6 (0.5-0.7)      | 0.8 (0.7-1.0)    |
| >0-959.9                                           | 19.0 (12.6-25.0)    | 14.6 (12.0-17.1)   | 13.0 (11.2-14.7) |
| 960.0-3,054.9                                      | 24.6 (18.5-30.3)    | 22.3 (19.6-24.8)   | 15.7 (14.0-17.4) |
| ≥3,055.0                                           | 39.5 (26.6-50.0)    | 25.7 (20.7-30.3)   | 23.8 (19.8-27.7) |
| <b>Total cumulative dose, mg</b>                   |                     |                    |                  |
| nonuse (ref)                                       | 4.9 (3.6-6.1)       | 3.7 (2.9-4.5)      | 3.8 (3.1-4.5)    |
| >0-959.9                                           | 5.0 (3.2-6.7)       | 6.3 (5.1-7.4)      | 7.9 (6.8-9.0)    |
| 960.0-3,054.9                                      | 4.8 (3.5-6.0)       | 4.5 (3.9-5.0)      | 4.6 (4.0-5.1)    |
| 3,055.0-7,299.9                                    | 2.4 (1.5-3.3)       | 1.8 (1.4-2.1)      | 2.4 (2.0-2.8)    |
| ≥7,300.0                                           | 4.7 (1.0-8.3)       | 1.0 (0.3-1.8)      | 0.8 (0.2-1.4)    |
| <b>Cumulative probability (95% CI) at 5 years</b>  | 14.1 (12.9-15.2)    | 12.4 (11.9-13.0)   | 13.4 (12.9-14.0) |
| <b>Current daily dose, mg</b>                      |                     |                    |                  |
| nonuse (ref)                                       | 11.0 (9.7-12.2)     | 8.2 (7.6-8.9)      | 8.7 (8.1-9.3)    |
| >0-4.9                                             | 19.7 (14.9-24.3)    | 15.9 (14.1-17.6)   | 18.9 (17.1-20.7) |
| 5.0-14.9                                           | 22.8 (18.6-26.8)    | 20.6 (18.9-22.2)   | 19.7 (18.2-21.2) |
| 15.0-24.9                                          | 28.3 (18.9-36.7)    | 22.0 (17.8-26.1)   | 26.4 (21.9-30.6) |
| ≥25.0                                              | 32.8 (16.9-45.6)    | 26.6 (20.3-32.4)   | 26.9 (19.9-33.3) |
| <b>Cumulative dose in last year, mg</b>            |                     |                    |                  |
| nonuse (ref)                                       | 8.1 (7.1-9.1)       | 5.3 (4.8-5.7)      | 5.9 (5.4-6.4)    |
| >0-959.9                                           | 42.6 (33.4-50.6)    | 26.2 (23.2-29.0)   | 23.7 (21.2-26.1) |
| 960.0-3,054.9                                      | 41.9 (34.2-48.6)    | 38.6 (35.4-41.6)   | 31.6 (29.1-34.0) |
| ≥3,055.0                                           | 54.9 (36.5-67.9)    | 55.8 (47.5-62.8)   | 39.8 (33.9-45.1) |
| <b>Total cumulative dose, mg</b>                   |                     |                    |                  |
| nonuse (ref)                                       | 15.4 (12.8-18.0)    | 15.2 (13.2-17.1)   | 13.2 (11.3-14.9) |
| >0-959.9                                           | 16.3 (12.9-19.5)    | 16.5 (14.4-18.5)   | 18.0 (16.0-19.9) |
| 960.0-3,054.9                                      | 16.2 (13.4-19.0)    | 16.0 (14.6-17.4)   | 16.0 (14.7-17.3) |
| 3,055.0-7,299.9                                    | 15.6 (12.9-18.2)    | 12.6 (11.5-13.6)   | 14.4 (13.3-15.5) |
| ≥7,300.0                                           | 7.4 (5.5-9.4)       | 7.3 (6.4-8.1)      | 7.5 (6.6-8.5)    |
| <b>Cumulative probability (95% CI) at 10 years</b> | 22.5 (20.8-24.2)    | 20.0 (19.2-20.8)   | 22.3 (21.3-23.3) |
| <b>Current daily dose, mg</b>                      |                     |                    |                  |
| nonuse (ref)                                       | 18.4 (16.6-20.2)    | 14.9 (14.0-15.9)   | 16.4 (15.2-17.6) |
| >0-4.9                                             | 31.8 (24.5-38.3)    | 24.3 (21.8-26.8)   | 31.2 (27.9-34.3) |
| 5.0-14.9                                           | 30.3 (24.5-35.6)    | 30.9 (28.4-33.2)   | 31.4 (28.5-34.2) |
| 15.0-24.9                                          | 59.5 (38.6-73.3)    | 33.2 (26.7-39.1)   | 39.7 (30.6-47.6) |
| ≥25.0                                              | 67.8 (37.5-83.4)    | 39.4 (29.9-47.6)   | 28.5 (19.7-36.4) |
| <b>Cumulative dose in last year, mg</b>            |                     |                    |                  |
| nonuse (ref)                                       | 15.5 (13.9-17.2)    | 11.8 (11.0-12.6)   | 14.0 (12.9-15.1) |
| >0-959.9                                           | 44.6 (34.4-53.2)    | 33.2 (29.3-36.8)   | 30.2 (26.1-34.1) |
| 960.0-3,054.9 g                                    | 56.6 (43.0-67.0)    | 39.7 (36.0-43.2)   | 38.8 (34.7-42.6) |
| ≥3,055.0                                           | 52.2 (31.0-66.9)    | 52.2 (42.4-60.4)   | 48.6 (37.2-58.0) |



|                                                    |                     |                    |                  |
|----------------------------------------------------|---------------------|--------------------|------------------|
| <b>Total cumulative dose, mg</b>                   |                     |                    |                  |
| nonuse (ref)                                       | 24.4 (20.5-28.1)    | 24.6 (21.7-27.4)   | 21.9 (18.5-25.2) |
| >0-959.9                                           | 24.3 (19.6-28.7)    | 24.3 (21.3-27.2)   | 28.8 (24.9-32.5) |
| 960.0-3,054.9                                      | 23.5 (19.6-27.2)    | 23.9 (21.8-25.9)   | 23.5 (21.3-25.6) |
| 3,055.0-7,299.9                                    | 23.2 (19.4-26.7)    | 19.6 (18.1-21.2)   | 23.6 (21.6-25.5) |
| ≥7,300.0                                           | 17.8 (14.4-21.0)    | 15.2 (13.9-16.5)   | 16.9 (15.1-18.6) |
| <b>Parasitic infections</b>                        | <b>&lt;60 years</b> | <b>60-74 years</b> | <b>≥75 years</b> |
| Incident infections, n (%)                         | 126                 | 476                | 518              |
| <b>Cumulative probability (95% CI) at 1 year</b>   | 0.9 (0.6-1.1)       | 0.8 (0.7-1.0)      | 1.0 (0.9-1.2)    |
| <b>Current daily dose, mg</b>                      |                     |                    |                  |
| nonuse (ref)                                       | 0.6 (0.3-1.0)       | 0.6 (0.4-0.8)      | 0.6 (0.5-0.8)    |
| >0-4.9                                             | 0.5 (0.0-1.1)       | 0.8 (0.5-1.2)      | 0.8 (0.5-1.1)    |
| 5.0-14.9                                           | 1.5 (0.7-2.3)       | 0.9 (0.6-1.2)      | 1.3 (1.0-1.6)    |
| 15.0-24.9                                          | 0.5 (0.0-1.5)       | 1.6 (0.8-2.4)      | 2.5 (1.6-3.5)    |
| ≥25.0                                              | 2.3 (0.0-5.4)       | 1.4 (0.3-2.6)      | 2.6 (1.1-4.1)    |
| <b>Cumulative dose in last year, mg</b>            |                     |                    |                  |
| nonuse (ref)                                       | 0.3 (0.1-0.5)       | 0.1 (0.1-0.2)      | 0.2 (0.1-0.3)    |
| >0-959.9                                           | 2.1 (0.0-4.5)       | 4.2 (2.7-5.7)      | 3.4 (2.4-4.5)    |
| 960.0-3,054.9                                      | 8.5 (4.2-12.6)      | 7.0 (5.2- 8.8)     | 4.7 (3.6-5.7)    |
| ≥3,055.0                                           | 10.4 (0.4-19.3)     | 8.3 (4.9-11.7)     | 7.5 (4.9-10.0)   |
| <b>Total cumulative dose, mg</b>                   |                     |                    |                  |
| nonuse (ref)                                       | 1.0 (0.4-1.6)       | 1.0 (0.6-1.4)      | 1.1 (0.7-1.4)    |
| >0-959.9                                           | 0.7 (0.0-1.3)       | 1.6 (1.0-2.2)      | 1.8 (1.3-2.4)    |
| 960.0-3,054.9                                      | 1.1 (0.5-1.8)       | 1.1 (0.8-1.3)      | 1.2 (0.9-1.5)    |
| 3,055.0-7,299.9                                    | 0.6 (0.2-1.0)       | 0.4 (0.3-0.6)      | 0.6 (0.4-0.8)    |
| ≥7,300.0                                           | 0.0 (0.0-0.0)       | 0.4 (0.0-0.9)      | 0.5 (0.0-1.0)    |
| <b>Cumulative probability (95% CI) at 5 years</b>  | 2.6 (2.1-3.1)       | 2.6 (2.3-2.9)      | 3.0 (2.7-3.3)    |
| <b>Current daily dose, mg</b>                      |                     |                    |                  |
| nonuse (ref)                                       | 2.1 (1.5-2.6)       | 1.7 (1.4-2.0)      | 2.0 (1.7-2.3)    |
| >0-4.9                                             | 2.9 (1.0-4.8)       | 3.6 (2.7-4.4)      | 3.1 (2.3-3.9)    |
| 5.0-14.9                                           | 4.8 (2.7-6.7)       | 4.1 (3.3-4.9)      | 4.8 (4.0-5.7)    |
| 15.0-24.9                                          | 3.2 (0.0-6.7)       | 6.7 (4.2-9.1)      | 6.9 (4.4-9.4)    |
| ≥25.0                                              | 8.8 (0.2-16.6)      | 5.5 (2.4-8.5)      | 8.6 (3.8-13.1)   |
| <b>Cumulative dose in last year, mg</b>            |                     |                    |                  |
| nonuse (ref)                                       | 1.5 (1.0-1.9)       | 1.0 (0.8-1.2)      | 1.2 (1.0-1.4)    |
| >0-959.9                                           | 6.4 (2.1-10.5)      | 5.6 (4.1-7.1)      | 5.2 (4.0-6.5)    |
| 960.0-3,054.9                                      | 10.4 (4.7-15.7)     | 10.1 (8.0-12.2)    | 8.5 (6.9-10.1)   |
| ≥3,055.0                                           | 18.8 (0.0-34.7)     | 15.4 (9.8-20.7)    | 10.7 (6.8-14.5)  |
| <b>Total cumulative dose, mg</b>                   |                     |                    |                  |
| nonuse (ref)                                       | 3.1 (1.9-4.3)       | 3.8 (2.8-4.9)      | 3.1 (2.2-3.9)    |
| >0-959.9                                           | 2.6 (1.2-4.0)       | 3.7 (2.6-4.7)      | 4.5 (3.4-5.6)    |
| 960.0-3,054.9                                      | 3.5 (2.1-4.9)       | 3.4 (2.7-4.1)      | 3.8 (3.1-4.5)    |
| 3,055.0-7,299.9                                    | 3.0 (1.8-4.3)       | 2.6 (2.1-3.0)      | 2.9 (2.4-3.5)    |
| ≥7,300.0                                           | 0.9 (0.2-1.6)       | 1.3 (1.0-1.7)      | 1.6 (1.2-2.1)    |
| <b>Cumulative probability (95% CI) at 10 years</b> | 4.0 (3.2-4.7)       | 4.0 (3.6-4.4)      | 4.7 (4.2-5.2)    |
| <b>Current daily dose, mg</b>                      |                     |                    |                  |
| nonuse (ref)                                       | 3.1 (2.4-3.9)       | 2.7 (2.3-3.1)      | 3.4 (2.9-3.9)    |
| >0-4.9                                             | 3.6 (1.3-5.9)       | 5.8 (4.4-7.1)      | 5.1 (3.7-6.5)    |
| 5.0-14.9                                           | 7.5 (4.2-10.7)      | 5.9 (4.7-7.2)      | 7.7 (5.9-9.4)    |
| 15.0-24.9                                          | 8.0 (0.0-17.1)      | 11.4 (6.8-15.8)    | 6.6 (4.2-9.0)    |
| ≥25.0                                              | 19.4 (4.0-32.4)     | 9.4 (4.3-14.3)     | 12.2 (1.2-22.0)  |
| <b>Cumulative dose in last year, mg</b>            |                     |                    |                  |
| nonuse (ref)                                       | 2.6 (1.9-3.3)       | 2.0 (1.6-2.3)      | 2.6 (2.2-3.1)    |
| >0-959.9                                           | 6.2 (2.7-9.5)       | 6.6 (4.9-8.2)      | 6.8 (4.6-9.0)    |
| 960.0-3,054.9                                      | 16.8 (5.8-26.5)     | 10.3 (7.9-12.7)    | 9.7 (7.0-12.2)   |

|                                                    |                     |                    |                  |
|----------------------------------------------------|---------------------|--------------------|------------------|
| ≥3,055.0                                           | 7.8 (2.8-12.5)      | 13.7 (5.8-21.0)    | 7.3 (5.3-9.2)    |
| <b>Total cumulative dose, mg</b>                   |                     |                    |                  |
| nonuse (ref)                                       | 4.2 (2.6-5.8)       | 6.2 (4.5-7.8)      | 5.1 (3.3-6.9)    |
| >0-959.9                                           | 2.9 (1.4-4.5)       | 5.6 (4.1-7.2)      | 7.6 (5.2-9.8)    |
| 960.0-3,054.9                                      | 4.9 (3.1-6.7)       | 4.8 (3.8-5.8)      | 5.7 (4.5-6.9)    |
| 3,055.0-7,299.9                                    | 5.6 (3.5-7.6)       | 3.5 (2.8-4.1)      | 4.4 (3.5-5.3)    |
| ≥7,300.0                                           | 2.4 (1.1-3.7)       | 2.9 (2.3-3.5)      | 3.0 (2.3-3.7)    |
| <b>Fungal infections</b>                           | <b>&lt;60 years</b> | <b>60-74 years</b> | <b>≥75 years</b> |
| Incident infections, n (%)                         | 687                 | 2,477              | 2,252            |
| <b>Cumulative probability (95% CI) at 1 year</b>   | 4.1 (3.5-4.7)       | 3.8 (3.5-4.1)      | 3.9 (3.7-4.2)    |
| <b>Current daily dose, mg</b>                      |                     |                    |                  |
| nonuse (ref)                                       | 2.6 (2.0-3.3)       | 2.3 (2.0-2.7)      | 2.5 (2.1-2.8)    |
| >0-4.9                                             | 4.9 (3.1-6.6)       | 4.0 (3.3-4.6)      | 4.0 (3.3-4.6)    |
| 5.0-14.9                                           | 5.6 (4.1-7.1)       | 4.6 (4.0-5.2)      | 4.7 (4.1-5.2)    |
| 15.0-24.9                                          | 9.2 (5.2-13.1)      | 6.1 (4.6-7.6)      | 8.2 (6.5-9.9)    |
| ≥25.0                                              | 10.8 (4.2-16.8)     | 7.8 (5.2-10.4)     | 8.7 (6.0-11.3)   |
| <b>Cumulative dose in last year, mg</b>            |                     |                    |                  |
| nonuse (ref)                                       | 1.3 (1.0-1.7)       | 0.8 (0.6-0.9)      | 0.8 (0.7-1.0)    |
| >0-959.9                                           | 17.5 (11.7-22.8)    | 14.2 (11.8-16.6)   | 11.6 (9.9-13.3)  |
| 960.0-3,054.9                                      | 25.9 (20.0-31.4)    | 25.0 (22.4-27.5)   | 17.0 (15.2-18.7) |
| ≥3,055.0                                           | 35.5 (22.9-46.0)    | 23.9 (18.9-28.6)   | 23.0 (18.8-26.9) |
| <b>Total cumulative dose, mg</b>                   |                     |                    |                  |
| nonuse (ref)                                       | 4.5 (3.2-5.7)       | 4.7 (3.7-5.6)      | 4.0 (3.3-4.8)    |
| >0-959.9                                           | 5.1 (3.3-6.9)       | 7.0 (5.7-8.1)      | 6.7 (5.7-7.8)    |
| 960.0-3,054.9                                      | 5.5 (4.2-6.8)       | 5.3 (4.7-5.9)      | 5.1 (4.5-5.6)    |
| 3,055.0-7,299.9                                    | 2.0 (1.2-2.8)       | 1.6 (1.3-1.9)      | 2.0 (1.7-2.4)    |
| ≥7,300.0                                           | 3.9 (0.5-7.3)       | 0.9 (0.2-1.6)      | 1.5 (0.6-2.3)    |
| <b>Cumulative probability (95% CI) at 5 years</b>  | 15.5 (14.3-16.7)    | 14.0 (13.4-14.6)   | 13.0 (12.4-13.5) |
| <b>Current daily dose, mg</b>                      |                     |                    |                  |
| nonuse (ref)                                       | 11.7 (10.4-13.0)    | 9.1 (8.5-9.8)      | 8.9 (8.2-9.5)    |
| >0-4.9                                             | 21.6 (16.7-26.2)    | 19.3 (17.4-21.1)   | 17.5 (15.8-19.2) |
| 5.0-14.9                                           | 28.6 (24.1-32.9)    | 21.7 (20.0-23.3)   | 18.0 (16.5-19.5) |
| 15.0-24.9                                          | 29.2 (19.2-38.0)    | 30.1 (25.3-34.6)   | 25.2 (20.7-29.4) |
| ≥25.0                                              | 25.9 (13.0-36.8)    | 27.1 (21.1-32.6)   | 27.0 (20.2-33.2) |
| <b>Cumulative dose in last year, mg</b>            |                     |                    |                  |
| nonuse (ref)                                       | 8.8 (7.7- 9.9)      | 5.8 (5.4-6.3)      | 5.9 (5.4-6.4)    |
| >0-959.9                                           | 41.3 (33.0-48.7)    | 29.8 (26.7-32.8)   | 22.5 (20.0-24.8) |
| 960.0-3,054.9                                      | 47.5 (39.7-54.3)    | 43.5 (40.3-46.6)   | 30.5 (28.0-32.9) |
| ≥3,055.0                                           | 60.2 (41.8-72.7)    | 53.2 (45.9-59.4)   | 34.8 (28.6-40.4) |
| <b>Total cumulative dose, mg</b>                   |                     |                    |                  |
| nonuse (ref)                                       | 16.7 (14.0-19.4)    | 16.2 (14.2-18.2)   | 14.5 (12.6-16.4) |
| >0-959.9                                           | 15.8 (12.5-18.9)    | 17.7 (15.6-19.8)   | 17.6 (15.6-19.6) |
| 960.0-3,054.9                                      | 18.6 (15.6-21.4)    | 19.0 (17.4-20.5)   | 17.0 (15.7-18.4) |
| 3,055.0-7,299.9                                    | 17.0 (14.2-19.7)    | 14.4 (13.3-15.6)   | 12.5 (11.4-13.5) |
| ≥7,300.0                                           | 9.1 (6.9-11.3)      | 7.7 (6.8-8.5)      | 6.9 (6.0-7.8)    |
| <b>Cumulative probability (95% CI) at 10 years</b> | 22.2 (20.5-23.8)    | 21.7 (20.9-22.6)   | 20.4 (19.4-21.3) |
| <b>Current daily dose, mg</b>                      |                     |                    |                  |
| nonuse (ref)                                       | 17.5 (15.7-19.2)    | 16.3 (15.3-17.2)   | 15.7 (14.6-16.8) |
| >0-4.9                                             | 29.9 (23.4-36.0)    | 28.9 (26.1-31.5)   | 28.3 (25.2-31.3) |
| 5.0-14.9                                           | 37.0 (31.1-42.5)    | 31.2 (28.8-33.6)   | 25.9 (23.4-28.3) |
| 15.0-24.9                                          | 46.4 (30.1-58.9)    | 37.6 (31.6-43.1)   | 31.5 (25.1-37.4) |
| ≥25.0                                              | 47.6 (25.1-63.3)    | 35.2 (26.9-42.5)   | 35.5 (24.5-45.0) |
| <b>Cumulative dose in last year, mg</b>            |                     |                    |                  |
| nonuse (ref)                                       | 14.8 (13.2-16.4)    | 13.0 (12.1-13.9)   | 13.1 (12.1-14.1) |
| >0-959.9                                           | 42.7 (32.8-51.1)    | 34.0 (30.2-37.5)   | 29.9 (26.1-33.6) |

|                                  |                  |                  |                  |
|----------------------------------|------------------|------------------|------------------|
| 960.0-3,054.9                    | 53.3 (41.8-62.5) | 40.4 (37.0-43.6) | 32.8 (29.4-35.9) |
| ≥3,055.0                         | 48.1 (27.1-63.1) | 56.4 (46.4-64.6) | 33.3 (26.1-39.8) |
| <b>Total cumulative dose, mg</b> |                  |                  |                  |
| nonuse (ref)                     | 23.1 (19.4-26.6) | 25.6 (22.6-28.4) | 20.6 (17.7-23.4) |
| >0-959.9                         | 24.4 (19.6-28.9) | 26.7 (23.6-29.6) | 26.6 (23.1-29.8) |
| 960.0-3,054.9                    | 25.2 (21.3-29.0) | 28.4 (26.1-30.5) | 23.6 (21.6-25.6) |
| 3,055.0-7,299.9                  | 23.2 (19.6-26.7) | 21.9 (20.3-23.5) | 21.0 (19.2-22.8) |
| ≥7,300.0                         | 16.1 (12.9-19.1) | 15.0 (13.7-16.3) | 14.2 (12.6-15.8) |

Note: CI, confidence interval; IQR, interquartile range. Estimates are shown for time-variant prednisolone-equivalent dosage.

**Supplemental Table 10. Kaplan-Meier estimates of infections per level of current daily and cumulative oral glucocorticoid prednisolone-equivalent dose by vaccination status at baseline**

|                                                   | Immunisation type |                  |                  |                  |                  |                  |
|---------------------------------------------------|-------------------|------------------|------------------|------------------|------------------|------------------|
|                                                   | Pneumococcal      |                  | Influenza        |                  | Varicella zoster |                  |
| All-cause infection                               | Yes               | No               | Yes              | No               | Yes              | No               |
| Incident infections, n (%)                        | 10419             | 11815            | 14338            | 7896             | 55               | 22179            |
| <b>Cumulative probability (95% CI) at 1 year</b>  | 20.4 (19.8-21.0)  | 16.3 (15.8-16.8) | 19.6 (19.1-20.1) | 15.9 (15.3-16.5) | 16.6 (11.5-21.4) | 18.3 (17.9-18.7) |
| <b>Current daily dose, mg</b>                     |                   |                  |                  |                  |                  |                  |
| nonuse (ref)                                      | 14.5 (13.7-15.4)  | 11.6 (10.9-12.3) | 13.6 (12.9-14.3) | 11.9 (11.0-12.7) | 10.0 (2.6-16.8)  | 12.9 (12.4-13.5) |
| >0-4.9                                            | 18.9 (17.7-20.1)  | 17.0 (15.8-18.2) | 19.0 (18.0-20.1) | 15.9 (14.4-17.3) | 19.2 (7.0-29.8)  | 18.0 (17.1-18.8) |
| 5.0-14.9                                          | 23.7 (22.7-24.8)  | 18.4 (17.4-19.4) | 22.6 (21.7-23.5) | 18.1 (16.9-19.3) | 18.8 (9.6-27.1)  | 21.1 (20.4-21.8) |
| 15.0-24.9                                         | 32.7 (30.0-35.2)  | 27.9 (25.3-30.4) | 33.5 (31.1-35.8) | 24.7 (21.7-27.5) | 24.2 (0.0-42.5)  | 30.4 (28.5-32.2) |
| ≥25.0                                             | 36.0 (31.9-39.9)  | 35.6 (31.3-39.7) | 36.6 (32.9-40.0) | 34.4 (29.4-39.1) | 22.2 (0.0-45.1)  | 35.9 (32.9-38.7) |
| <b>Cumulative dose in last year, mg</b>           |                   |                  |                  |                  |                  |                  |
| nonuse (ref)                                      | 5.5 (5.1-5.9)     | 4.7 (4.4-5.1)    | 5.2 (4.8-5.5)    | 4.9 (4.5-5.3)    | 5.7 (0.7-10.5)   | 5.1 (4.8-5.3)    |
| >0-959.9                                          | 39.4 (37.2-41.4)  | 38.4 (36.1-40.7) | 39.4 (37.6-41.3) | 37.8 (35.0-40.6) | 23.0 (9.9-34.3)  | 39.1 (37.5-40.7) |
| 960.0-3,054.9                                     | 49.5 (47.7-51.2)  | 48.8 (46.8-50.7) | 50.2 (48.7-51.8) | 46.8 (44.4-49.1) | 20.5 (10.4-29.4) | 49.5 (48.2-50.7) |
| ≥3,055.0                                          | 58.4 (55.2-61.4)  | 62.5 (59.0-65.7) | 60.9 (58.0-63.5) | 58.9 (54.6-62.7) | 40.7 (6.7-62.4)  | 60.3 (58.0-62.6) |
| <b>Total cumulative dose, mg</b>                  |                   |                  |                  |                  |                  |                  |
| nonuse (ref)                                      | 24.3 (22.6-26.0)  | 17.9 (16.6-19.2) | 22.3 (20.9-23.6) | 18.3 (16.8-19.8) | 17.7 ( 2.1-30.8) | 20.6 (19.6-21.6) |
| >0-959.9                                          | 34.3 (32.4-36.2)  | 24.2 (22.6-25.8) | 31.9 (30.3-33.5) | 23.9 (21.9-25.9) | 34.7 (15.1-49.7) | 29.0 (27.7-30.2) |
| 960.0-3,054.9                                     | 23.7 (22.6-24.7)  | 20.0 (19.0-21.0) | 23.1 (22.2-24.0) | 19.5 (18.3-20.7) | 14.3 (6.7-21.3)  | 21.9 (21.2-22.7) |
| 3,055.0-7,299.9                                   | 10.9 (10.1-11.7)  | 9.5 (8.8-10.3)   | 10.9 (10.3-11.6) | 8.9 (8.1-9.7)    | 11.8 (3.8-19.2)  | 10.2 ( 9.7-10.7) |
| ≥7,300.0                                          | 7.7 ( 5.5-9.9)    | 7.2 (5.3-9.1)    | 8.6 (6.7-10.5)   | 5.3 (3.2-7.4)    | 0.0 (0.0-0.0)    | 7.5 (6.0-8.9)    |
| <b>Cumulative probability (95% CI) at 5 years</b> | 58.8 (58.0-59.7)  | 51.1 (50.3-51.9) | 57.3 (56.6-58.0) | 50.2 (49.3-51.1) | 39.8 (24.7-51.9) | 54.7 (54.1-55.2) |
| <b>Current daily dose, mg</b>                     |                   |                  |                  |                  |                  |                  |
| nonuse (ref)                                      | 44.7 (43.5-45.9)  | 40.1 (39.1-41.1) | 43.8 (42.8-44.8) | 39.5 (38.3-40.7) | 37.3 (6.1-58.1)  | 42.1 (41.3-42.8) |
| >0-4.9                                            | 69.9 (67.9-71.9)  | 60.7 (58.7-62.7) | 67.3 (65.6-69.0) | 60.7 (58.2-63.0) | 51.2 (9.0-73.9)  | 65.0 (63.6-66.4) |
| 5.0-14.9                                          | 73.3 (71.7-74.8)  | 66.4 (64.8-68.0) | 72.2 (70.8-73.5) | 65.3 (63.2-67.2) | 38.2 (20.5-51.9) | 69.9 (68.7-71.0) |
| 15.0-24.9                                         | 81.0 (77.5-84.0)  | 74.9 (71.2-78.1) | 78.7 (75.7-81.4) | 76.1 (71.5-80.0) | 29.8 (0.0-51.1)  | 77.9 (75.5-80.2) |
| ≥25.0                                             | 86.0 (81.5-89.5)  | 77.1 (72.2-81.2) | 83.8 (79.9-87.0) | 76.6 (70.4-81.5) | 18.2 (0.0-38.1)  | 81.6 (78.3-84.3) |
| <b>Cumulative dose in last year, mg</b>           |                   |                  |                  |                  |                  |                  |

|                                                    |                  |                  |                  |                  |                    |                  |
|----------------------------------------------------|------------------|------------------|------------------|------------------|--------------------|------------------|
| nonuse (ref)                                       | 35.5 (34.3-36.6) | 30.5 (29.6-31.5) | 34.1 (33.1-35.1) | 30.3 (29.2-31.4) | 42.9 ( 0.0-69.0)   | 32.6 (31.8-33.3) |
| >0-959.9                                           | 74.5 (72.3-76.5) | 75.2 (73.0-77.2) | 75.0 (73.1-76.7) | 74.6 (71.9-77.1) | 36.9 (19.4-50.6)   | 74.9 (73.4-76.3) |
| 960.0-3,054.9                                      | 84.7 (83.2-86.2) | 84.1 (82.6-85.5) | 85.4 (84.1-86.6) | 82.5 (80.6-84.3) | 38.1 ( 8.6-58.1)   | 84.5 (83.4-85.5) |
| ≥3,055.0                                           | 93.7 (91.3-95.4) | 91.6 (89.1-93.5) | 92.8 (90.8-94.4) | 92.4 (89.4-94.6) | 55.9 (12.4-77.8)   | 92.7 (91.0-94.0) |
| <b>Total cumulative dose, mg</b>                   |                  |                  |                  |                  |                    |                  |
| nonuse (ref)                                       | 62.5 (59.9-64.9) | 56.1 (54.1-58.1) | 61.2 (59.1-63.3) | 55.4 (52.9-57.7) | 34.0 ( 10.2- 51.5) | 58.7 (57.1-60.2) |
| >0-959.9                                           | 68.4 (66.0-70.6) | 57.3 (55.1-59.4) | 66.4 (64.4-68.3) | 55.7 (53.0-58.3) | 100.0 ( NA- NA)    | 62.3 (60.7-63.9) |
| 960.0-3,054.9                                      | 65.1 (63.4-66.6) | 58.3 (56.7-59.9) | 64.6 (63.2-65.9) | 56.1 (54.1-58.0) | 23.8 ( 10.3- 35.3) | 61.8 (60.6-62.9) |
| 3,055.0-7,299.9                                    | 57.7 (56.2-59.2) | 52.9 (51.4-54.3) | 57.0 (55.7-58.3) | 52.0 (50.2-53.7) | 34.7 ( 8.6- 53.3)  | 55.2 (54.1-56.2) |
| ≥7,300.0                                           | 41.3 (39.3-43.2) | 32.2 (30.6-33.8) | 38.6 (37.0-40.2) | 32.0 (30.0-33.9) | 31.2 ( 0.0- 61.9)  | 36.1 (34.8-37.3) |
| <b>Cumulative probability (95% CI) at 10 years</b> |                  |                  |                  |                  |                    |                  |
|                                                    | 81.2 (80.1-82.2) | 73.9 (73.1-74.7) | 79.4 (78.6-80.1) | 73.0 (72.0-74.0) | 39.8 (24.7-51.9)   | 76.9 (76.2-77.5) |
| <b>Current daily dose, mg</b>                      |                  |                  |                  |                  |                    |                  |
| nonuse (ref)                                       | 72.7 (71.0-74.3) | 65.4 (64.2-66.5) | 70.8 (69.6-72.0) | 64.3 (62.8-65.7) | 37.3 ( 6.1-58.1)   | 68.0 (67.0-68.9) |
| >0-4.9                                             | 86.9 (84.4-89.0) | 82.3 (80.2-84.1) | 85.5 (83.6-87.3) | 82.3 (79.7-84.5) | 51.2 ( 9.0-73.9)   | 84.4 (82.9-85.8) |
| 5.0-14.9                                           | 90.8 (88.9-92.3) | 87.0 (85.5-88.4) | 89.9 (88.4-91.1) | 86.4 (84.3-88.2) | 38.2 (20.5-51.9)   | 88.7 (87.6-89.7) |
| 15.0-24.9                                          | 94.6 (90.7-96.9) | 90.4 (86.8-93.0) | 93.1 (90.0-95.2) | 90.8 (86.2-93.9) | 29.8 ( 0.0-51.1)   | 92.3 (89.9-94.2) |
| ≥25.0                                              | 93.0 (88.0-95.9) | 92.5 (88.1-95.2) | 92.1 (88.4-94.6) | 96.3 (89.7-98.7) | 18.2 ( 0.0-38.1)   | 93.1 (90.1-95.2) |
| <b>Cumulative dose in last year, mg</b>            |                  |                  |                  |                  |                    |                  |
| nonuse (ref)                                       | 68.2 (66.4-70.0) | 59.5 (58.3-60.7) | 65.8 (64.5-67.1) | 58.3 (56.8-59.8) | 42.9 (0.0-69.0)    | 62.5 (61.5-63.5) |
| >0-959.9                                           | 88.7 (85.9-90.8) | 88.3 (86.3-90.1) | 88.5 (86.4-90.2) | 88.7 (86.0-90.9) | 36.9 (19.4-50.6)   | 88.7 (87.1-90.1) |
| 960.0-3,054.9                                      | 92.7 (90.8-94.2) | 93.0 (91.7-94.1) | 93.0 (91.7-94.2) | 92.9 (91.1-94.3) | 38.1 (8.6-58.1)    | 93.1 (92.1-94.0) |
| ≥3,055.0                                           | 96.6 (94.0-98.1) | 97.4 (95.1-98.6) | 96.6 (94.3-98.0) | 97.7 (95.1-98.9) | 55.9 (12.4-77.8)   | 97.2 (95.7-98.2) |
| <b>Total cumulative dose, mg</b>                   |                  |                  |                  |                  |                    |                  |
| nonuse (ref)                                       | 84.2 (80.4-87.2) | 77.3 (75.1-79.2) | 82.2 (79.8-84.4) | 76.0 (73.3-78.4) | 34.0 (10.2- 51.5)  | 79.3 (77.5-80.9) |
| >0-959.9                                           | 87.4 (84.5-89.8) | 78.5 (76.2-80.7) | 86.2 (84.0-88.1) | 76.1 (73.1-78.8) | 100.0 (NA-NA)      | 82.2 (80.4-83.8) |
| 960.0-3,054.9                                      | 85.1 (83.0-86.9) | 78.3 (76.5-79.9) | 84.1 (82.6-85.6) | 76.3 (74.0-78.3) | 23.8 (10.3-35.3)   | 81.3 (80.1-82.5) |
| 3,055.0-7,299.9                                    | 78.7 (76.6-80.5) | 74.1 (72.5-75.6) | 77.7 (76.1-79.1) | 73.4 (71.4-75.3) | 34.7 (8.6-53.3)    | 76.1 (74.8-77.2) |
| ≥7,300.0                                           | 73.1 (70.4-75.5) | 64.0 (62.1-65.8) | 69.6 (67.7-71.5) | 64.0 (61.6-66.3) | 31.2 (0.0-61.9)    | 67.4 (65.9-68.8) |
| <b>Bacterial infections</b>                        |                  |                  |                  |                  |                    |                  |
| Incident infections, n (%)                         | 2558             | 2676             | 3514             | 1720             | 12                 | 5222             |
| <b>Cumulative probability (95% CI) at 1 year</b>   |                  |                  |                  |                  |                    |                  |
|                                                    | 3.7 (3.5-4.0)    | 2.6 (2.4-2.9)    | 3.5 (3.3-3.7)    | 2.5 (2.3-2.8)    | 3.9 (1.4-6.4)      | 3.2 (3.0-3.3)    |
| <b>Current daily dose, mg</b>                      |                  |                  |                  |                  |                    |                  |
| nonuse (ref)                                       | 2.7 (2.3-3.1)    | 1.6 (1.3-1.8)    | 2.4 (2.1-2.7)    | 1.5 (1.2-1.8)    | 2.5 (0.0-5.8)      | 2.1 (1.8-2.3)    |

|                                                       |                  |                  |                  |                  |                 |                  |
|-------------------------------------------------------|------------------|------------------|------------------|------------------|-----------------|------------------|
| >0-4.9                                                | 3.6 (3.0-4.2)    | 3.2 ( 2.7-3.8)   | 3.9 (3.3-4.4)    | 2.6 (2.0-3.2)    | 8.0 ( 0.1-15.3) | 3.4 (3.0-3.8)    |
| 5.0-14.9                                              | 4.0 (3.5-4.6)    | 2.9 ( 2.4-3.3)   | 3.6 (3.2-4.1)    | 3.1 (2.6-3.7)    | 2.4 ( 0.0- 5.7) | 3.5 (3.1-3.8)    |
| 15.0-24.9                                             | 7.5 (6.0-9.1)    | 5.1 ( 3.8-6.4)   | 7.3 (5.9-8.7)    | 4.7 (3.2-6.2)    | 7.7 ( 0.0-21.1) | 6.3 (5.3-7.4)    |
| ≥25.0                                                 | 7.1 (4.8-9.3)    | 8.9 ( 6.1-11.6)  | 7.2 (5.2-9.2)    | 9.3 (6.0-12.4)   | 0.0 ( 0.0- 0.0) | 8.0 (6.2-9.7)    |
| <b>Cumulative dose in last year, mg</b>               |                  |                  |                  |                  |                 |                  |
| nonuse (ref)                                          | 0.8 (0.7-1.0)    | 0.6 (0.5-0.7)    | 0.8 (0.7-0.9)    | 0.6 (0.4-0.7)    | 1.9 (0.0-4.6)   | 0.7 (0.6-0.8)    |
| >0-959.9                                              | 11.8 (10.0-13.5) | 10.8 (8.8-12.8)  | 11.6 (10.0-13.2) | 10.9 (8.4-13.3)  | 8.7 (0.1-16.4)  | 11.4 (10.1-12.8) |
| 960.0-3,054.9                                         | 16.7 (14.9-18.4) | 17.8 (15.6-19.9) | 17.2 (15.5-18.8) | 17.1 (14.5-19.5) | 5.0 (0.0-10.6)  | 17.4 (16.0-18.7) |
| ≥3,055.0                                              | 21.7 (17.8-25.5) | 25.6 (20.5-30.4) | 24.1 (20.3-27.7) | 21.4 (15.9-26.6) | 0.0 (0.0-0.0)   | 23.5 (20.4-26.5) |
| <b>Total cumulative dose, mg</b>                      |                  |                  |                  |                  |                 |                  |
| nonuse (ref)                                          | 4.7 (3.8-5.5)    | 2.7 (2.2-3.3)    | 4.2 (3.5-4.9)    | 2.6 (2.0-3.2)    | 6.7 (0.0-15.2)  | 3.5 (3.0-4.0)    |
| >0-959.9                                              | 7.0 (5.9-8.1)    | 3.9 (3.2-4.7)    | 6.3 (5.4-7.2)    | 3.8 (2.9-4.7)    | 14.1 (0.2-26.1) | 5.3 (4.6-5.9)    |
| 960.0-3,054.9                                         | 4.4 (3.9-4.9)    | 3.6 (3.1-4.1)    | 4.3 (3.8-4.7)    | 3.5 (3.0-4.1)    | 2.3 (0.0-5.4)   | 4.0 (3.7-4.4)    |
| 3,055.0-7,299.9                                       | 2.0 (1.6-2.3)    | 1.5 (1.2-1.8)    | 1.9 (1.6-2.2)    | 1.4 (1.1-1.8)    | 1.5 (0.0-4.4)   | 1.8 (1.5-2.0)    |
| ≥7,300.0                                              | 1.0 (0.3-1.7)    | 0.4 (0.0-0.8)    | 0.8 (0.2-1.3)    | 0.4 (0.0-0.9)    | 0.0 (0.0-0.0)   | 0.6 (0.2-1.0)    |
| <b>Cumulative probability (95% CI)<br/>at 5 years</b> |                  |                  |                  |                  |                 |                  |
|                                                       | 13.9 (13.3-14.5) | 9.7 ( 9.2-10.1)  | 13.1 (12.6-13.6) | 9.1 (8.6-9.7)    | 6.2 (2.6-9.7)   | 11.6 (11.2-12.0) |
| <b>Current daily dose, mg</b>                         |                  |                  |                  |                  |                 |                  |
| nonuse (ref)                                          | 8.9 (8.2-9.5)    | 6.5 (6.1-7.0)    | 8.7 (8.1-9.2)    | 5.9 (5.3-6.4)    | 7.4 (0.7-13.7)  | 7.5 (7.1-7.9)    |
| >0-4.9                                                | 21.0 (19.1-22.9) | 13.5 (12.0-14.9) | 19.0 (17.5-20.5) | 12.9 (11.1-14.7) | 8.0 (0.1-15.3)  | 17.0 (15.8-18.1) |
| 5.0-14.9                                              | 20.6 (18.9-22.2) | 14.9 (13.5-16.2) | 19.2 (17.8-20.5) | 14.6 (13.0-16.2) | 3.0 (0.0-6.9)   | 17.6 (16.6-18.7) |
| 15.0-24.9                                             | 24.2 (20.0-28.2) | 22.9 (18.8-26.7) | 23.4 (19.9-26.8) | 24.3 (19.2-29.1) | 9.1 (0.0-24.6)  | 23.7 (20.8-26.5) |
| ≥25.0                                                 | 32.3 (25.5-38.5) | 25.0 (19.2-30.3) | 28.0 (22.5-33.0) | 29.3 (21.7-36.2) | 0.0 (0.0-0.0)   | 28.5 (24.1-32.6) |
| <b>Cumulative dose in last year, mg</b>               |                  |                  |                  |                  |                 |                  |
| nonuse (ref)                                          | 5.9 (5.4-6.4)    | 4.2 (3.9-4.6)    | 5.7 (5.2-6.1)    | 3.9 (3.5-4.3)    | 8.2 (0.0-15.8)  | 4.9 (4.6-5.2)    |
| >0-959.9                                              | 24.2 (21.7-26.7) | 23.7 (20.9-26.5) | 24.3 (22.1-26.5) | 23.3 (19.8-26.7) | 10.6 (1.0-19.2) | 24.0 (22.1-25.8) |
| 960.0-3,054.9                                         | 33.5 (30.8-36.1) | 32.8 (30.0-35.5) | 34.8 (32.4-37.1) | 29.4 (26.3-32.4) | 3.4 (0.0-7.1)   | 33.2 (31.3-35.1) |
| ≥3,055.0                                              | 53.1 (46.1-59.3) | 47.2 (40.3-53.3) | 49.3 (43.6-54.5) | 53.0 (43.4-61.0) | 0.0 (0.0-0.0)   | 50.4 (45.6-54.8) |
| <b>Total cumulative dose, mg</b>                      |                  |                  |                  |                  |                 |                  |
| nonuse (ref)                                          | 15.5 (13.4-17.4) | 10.4 ( 9.1-11.7) | 14.8 (13.2-16.5) | 9.3 (7.8-10.7)   | 20.0 (0.0-36.7) | 12.3 (11.2-13.4) |
| >0-959.9                                              | 18.1 (16.0-20.1) | 11.2 ( 9.8-12.7) | 16.3 (14.7-18.0) | 10.9 (9.2-12.6)  | 16.5 (0.1-30.2) | 14.2 (12.9-15.4) |
| 960.0-3,054.9                                         | 17.0 (15.6-18.4) | 12.3 (11.1-13.4) | 16.5 (15.4-17.7) | 11.0 (9.7-12.2)  | 2.7 (0.0-6.3)   | 14.6 (13.7-15.5) |
| 3,055.0-7,299.9                                       | 13.5 (12.4-14.5) | 10.4 (9.5-11.3)  | 12.9 (12.0-13.8) | 10.0 (9.0-11.1)  | 2.9 (0.0-6.9)   | 11.9 (11.2-12.6) |
| ≥7,300.0                                              | 9.0 (8.0-10.0)   | 5.9 (5.2-6.6)    | 8.2 (7.5-9.0)    | 5.5 (4.7-6.4)    | 0.0 (0.0-0.0)   | 7.2 (6.6-7.8)    |

|                                                        |                  |                  |                  |                  |                 |                  |
|--------------------------------------------------------|------------------|------------------|------------------|------------------|-----------------|------------------|
| <b>Cumulative probability (95% CI)<br/>at 10 years</b> | 25.6 (24.4-26.8) | 18.1 (17.4-18.8) | 23.5 (22.7-24.3) | 17.3 (16.5-18.2) | 6.2 (2.6-9.7)   | 21.0 (20.4-21.6) |
| <b>Current daily dose, mg</b>                          |                  |                  |                  |                  |                 |                  |
| nonuse (ref)                                           | 19.0 (17.7-20.3) | 13.7 (12.9-14.5) | 17.4 (16.5-18.4) | 13.2 (12.2-14.1) | 7.4 (0.7-13.7)  | 15.6 (15.0-16.3) |
| >0-4.9                                                 | 37.2 (33.3-40.9) | 23.9 (21.6-26.2) | 33.6 (30.8-36.3) | 22.0 (19.2-24.7) | 8.0 (0.1-15.3)  | 29.2 (27.2-31.1) |
| 5.0-14.9                                               | 34.4 (31.4-37.2) | 27.3 (25.0-29.5) | 32.8 (30.5-35.1) | 26.6 (23.7-29.3) | 3.0 (0.0-6.9)   | 30.6 (28.8-32.4) |
| 15.0-24.9                                              | 38.3 (29.5-46.0) | 34.3 (28.4-39.8) | 37.5 (31.0-43.4) | 33.7 (26.6-40.2) | 9.1 (0.0-24.6)  | 35.9 (31.2-40.2) |
| ≥25.0                                                  | 48.6 (35.0-59.3) | 42.2 (32.6-50.4) | 44.6 (34.9-52.8) | 46.9 (33.9-57.3) | 0.0 (0.0-0.0)   | 45.6 (38.0-52.2) |
| <b>Cumulative dose in last year, mg</b>                |                  |                  |                  |                  |                 |                  |
| nonuse (ref)                                           | 16.2 (14.9-17.4) | 11.0 (10.3-11.7) | 14.4 (13.5-15.3) | 10.6 (9.7-11.4)  | 8.2 (0.0-15.8)  | 12.7 (12.1-13.4) |
| >0-959.9                                               | 33.8 (29.6-37.8) | 32.0 (28.4-35.5) | 34.8 (31.2-38.2) | 30.1 (25.7-34.2) | 10.6 (1.0-19.2) | 33.1 (30.4-35.7) |
| 960.0-3,054.9                                          | 42.7 (38.0-47.1) | 40.7 (37.2-43.9) | 42.7 (39.3-45.9) | 39.7 (35.0-44.1) | 3.4 (0.0-7.1)   | 41.8 (39.1-44.4) |
| ≥3,055.0                                               | 56.6 (48.8-63.2) | 50.9 (42.2-58.3) | 56.7 (48.7-63.4) | 49.8 (40.0-57.9) | 0.0 (0.0-0.0)   | 54.4 (48.4-59.7) |
| <b>Total cumulative dose, mg</b>                       |                  |                  |                  |                  |                 |                  |
| nonuse (ref)                                           | 30.3 (25.1-35.1) | 19.2 (17.0-21.4) | 27.8 (24.5-31.0) | 16.8 (14.3-19.2) | 20.0 (0.0-36.7) | 22.2 (20.2-24.2) |
| >0-959.9                                               | 28.9 (25.2-32.4) | 18.5 (16.3-20.7) | 26.6 (23.8-29.3) | 17.1 (14.6-19.6) | 16.5 (0.1-30.2) | 22.6 (20.7-24.4) |
| 960.0-3,054.9                                          | 29.0 (26.3-31.6) | 20.8 (19.0-22.6) | 27.5 (25.5-29.5) | 18.8 (16.7-20.9) | 2.7 (0.0-6.3)   | 24.2 (22.8-25.7) |
| 3,055.0-7,299.9                                        | 23.1 (21.0-25.2) | 19.3 (17.8-20.7) | 21.6 (20.0-23.0) | 19.6 (17.8-21.4) | 2.9 (0.0-6.9)   | 21.0 (19.8-22.2) |
| ≥7,300.0                                               | 22.1 (20.1-24.0) | 14.6 (13.4-15.7) | 19.5 (18.1-20.9) | 14.2 (12.7-15.6) | 0.0 (0.0-0.0)   | 17.4 (16.4-18.4) |
| <b>Viral infections</b>                                |                  |                  |                  |                  |                 |                  |
| Incident infections, n (%)                             | 2561             | 2783             | 3448             | 1896             | 10              | 5334             |
| <b>Cumulative probability (95% CI)<br/>at 1 year</b>   | 4.4 (4.1-4.7)    | 3.2 (2.9-3.4)    | 4.1 (3.8-4.3)    | 3.2 (2.9-3.5)    | 3.2 (0.8-5.5)   | 3.8 (3.6-4.0)    |
| <b>Current daily dose, mg</b>                          |                  |                  |                  |                  |                 |                  |
| nonuse (ref)                                           | 2.8 (2.4-3.2)    | 2.1 (1.8-2.4)    | 2.6 (2.3-2.9)    | 2.2 (1.8-2.6)    | 2.4 (0.0-5.7)   | 2.5 (2.2-2.7)    |
| >0-4.9                                                 | 4.0 (3.4-4.7)    | 3.1 (2.5-3.6)    | 3.8 (3.3-4.3)    | 3.1 (2.4-3.8)    | 0.0 (0.0-0.0)   | 3.6 (3.2-4.0)    |
| 5.0-14.9                                               | 5.5 (4.9-6.1)    | 3.7 (3.2-4.2)    | 5.0 (4.5-5.4)    | 4.0 (3.4-4.6)    | 3.8 (0.0-7.9)   | 4.6 (4.2-5.0)    |
| 15.0-24.9                                              | 7.5 (6.0-9.1)    | 6.9 (5.4-8.5)    | 8.3 (6.8-9.7)    | 5.4 (3.8-6.9)    | 15.4 (0.0-32.9) | 7.2 (6.1-8.3)    |
| ≥25.0                                                  | 8.4 (6.0-10.8)   | 7.4 (4.8-9.8)    | 8.1 (5.9-10.3)   | 7.7 (4.7-10.6)   | 0.0 (0.0-0.0)   | 8.0 (6.2-9.7)    |
| <b>Cumulative dose in last year, mg</b>                |                  |                  |                  |                  |                 |                  |
| nonuse (ref)                                           | 0.9 (0.7-1.0)    | 0.7 (0.6-0.9)    | 0.8 (0.7-0.9)    | 0.8 (0.7-1.0)    | 1.0 (0.0-2.9)   | 0.8 (0.7-0.9)    |
| >0-959.9                                               | 14.2 (12.3-16.0) | 13.6 (11.4-15.7) | 13.8 (12.1-15.4) | 14.3 (11.6-16.9) | 2.2 (0.0-6.3)   | 14.1 (12.7-15.5) |
| 960.0-3,054.9                                          | 18.5 (16.7-20.3) | 18.5 (16.3-20.6) | 19.0 (17.3-20.6) | 17.4 (14.9-19.8) | 6.4 (0.0-12.4)  | 18.7 (17.3-20.1) |
| ≥3055.0                                                | 24.0 (20.1-27.6) | 28.3 (23.3-32.9) | 26.0 (22.3-29.5) | 25.3 (19.9-30.4) | 6.7 (0.0-18.5)  | 26.0 (22.9-28.9) |
| <b>Total cumulative dose, mg</b>                       |                  |                  |                  |                  |                 |                  |

|                                                        |                  |                  |                  |                  |                 |                  |
|--------------------------------------------------------|------------------|------------------|------------------|------------------|-----------------|------------------|
| nonuse (ref)                                           | 4.9 (4.1-5.8)    | 3.3 (2.7-3.9)    | 4.3 (3.6-4.9)    | 3.6 (2.9-4.3)    | 3.3 (0.0-9.5)   | 4.0 (3.5-4.5)    |
| >0-959.9                                               | 8.9 (7.7-10.1)   | 5.2 (4.3-6.1)    | 7.8 (6.8-8.7)    | 5.4 (4.3-6.5)    | 3.6 (0.0-10.2)  | 6.9 (6.2-7.7)    |
| 960.0-3,054.9                                          | 5.1 (4.6-5.7)    | 3.9 (3.4-4.4)    | 4.8 (4.4-5.3)    | 3.9 (3.3-4.5)    | 3.4 (0.0-7.2)   | 4.5 (4.2-4.9)    |
| 3,055.0-7,299.9                                        | 2.3 (2.0-2.7)    | 2.0 (1.6-2.3)    | 2.3 (2.0-2.6)    | 1.8 (1.4-2.2)    | 2.7 (0.0-6.4)   | 2.1 (1.9-2.4)    |
| ≥7,300.0                                               | 1.3 (0.4-2.1)    | 1.2 (0.5-1.9)    | 1.5 (0.7-2.2)    | 0.7 (0.0-1.5)    | 0.0 (0.0-0.0)   | 1.2 (0.7-1.8)    |
| <b>Cumulative probability (95% CI)<br/>at 5 years</b>  | 14.8 (14.2-15.4) | 11.6 (11.1-12.1) | 13.9 (13.4-14.4) | 11.8 (11.1-12.4) | 10.1 (0.0-20.0) | 13.1 (12.7-13.5) |
| <b>Current daily dose, mg</b>                          |                  |                  |                  |                  |                 |                  |
| nonuse (ref)                                           | 9.6 (9.0-10.3)   | 8.2 (7.7-8.7)    | 9.2 (8.6-9.7)    | 8.3 (7.6-8.9)    | 13.0 (0.0-31.1) | 8.8 (8.4- 9.2)   |
| >0-4.9                                                 | 20.8 (18.8-22.6) | 14.9 (13.3-16.4) | 18.5 (17.0-20.0) | 16.0 (14.0-17.9) | 5.0 (0.0-14.1)  | 17.7 (16.5-18.9) |
| 5.0-14.9                                               | 22.1 (20.5-23.7) | 18.5 (17.0-20.0) | 21.2 (19.8-22.5) | 18.6 (16.8-20.4) | 7.3 (0.0-14.2)  | 20.4 (19.3-21.4) |
| 15.0-24.9                                              | 27.8 (23.2-32.1) | 22.1 (18.3-25.7) | 25.3 (21.7-28.7) | 23.3 (18.3-28.0) | 16.7 (0.0-35.3) | 24.6 (21.7-27.4) |
| ≥25.0                                                  | 28.8 (22.3-34.8) | 26.0 (19.9-31.6) | 27.3 (21.9-32.3) | 27.8 (20.1-34.9) | 0.0 (0.0- 0.0)  | 27.6 (23.2-31.7) |
| <b>Cumulative dose in last year, mg</b>                |                  |                  |                  |                  |                 |                  |
| nonuse (ref)                                           | 6.6 (6.0-7.1)    | 5.4 (5.0-5.8)    | 6.1 (5.6-6.5)    | 5.6 (5.1-6.1)    | 18.1 (0.0-42.8) | 5.9 (5.6-6.2)    |
| >0-959.9                                               | 25.1 (22.6-27.5) | 27.4 (24.4-30.2) | 24.3 (22.2-26.5) | 30.0 (26.3-33.5) | 1.9 (0.0-5.4)   | 26.2 (24.3-28.0) |
| 960.0-3,054.9                                          | 33.7 (31.1-36.2) | 36.6 (33.8-39.4) | 35.3 (33.0-37.6) | 34.5 (31.1-37.7) | 7.3 (0.1-14.0)  | 35.1 (33.2-37.0) |
| ≥3,055.0                                               | 49.1 (41.9-55.5) | 46.7 (40.1-52.5) | 48.3 (42.6-53.3) | 46.4 (37.1-54.2) | 12.7 (0.0-28.2) | 47.8 (43.1-52.1) |
| <b>Total cumulative dose, mg</b>                       |                  |                  |                  |                  |                 |                  |
| nonuse (ref)                                           | 15.7 (13.7-17.6) | 13.3 (11.9-14.8) | 14.6 (13.0-16.2) | 13.9 (12.2-15.6) | 3.3 (0.0-9.5)   | 14.4 (13.2-15.5) |
| >0-959.9                                               | 20.1 (18.0-22.2) | 14.7 (13.1-16.4) | 18.6 (16.9-20.3) | 14.9 (12.9-16.9) | 4.3 (0.0-12.3)  | 17.2 (15.9-18.5) |
| 960.0-3,054.9                                          | 17.6 (16.2-18.9) | 14.6 (13.4-15.8) | 17.0 (15.8-18.2) | 14.3 (12.8-15.7) | 4.0 (0.0-8.4)   | 16.1 (15.2-17.0) |
| 3,055.0-7,299.9                                        | 15.3 (14.2-16.5) | 12.2 (11.2-13.2) | 14.3 (13.4-15.3) | 12.6 (11.4-13.8) | 17.6 (0.0-37.0) | 13.7 (13.0-14.4) |
| ≥7,300.0                                               | 8.6 (7.7-9.6)    | 6.5 (5.7-7.2)    | 8.2 (7.4-9.0)    | 6.1 (5.2-7.0)    | 0.0 (0.0-0.0)   | 7.4 (6.8-8.0)    |
| <b>Cumulative probability (95% CI)<br/>at 10 years</b> | 24.1 (23.0-25.2) | 19.2 (18.5-20.0) | 22.5 (21.7-23.3) | 19.3 (18.4-20.2) | 10.1 (0.0-20.0) | 21.2 (20.6-21.8) |
| <b>Current daily dose, mg</b>                          |                  |                  |                  |                  |                 |                  |
| nonuse (ref)                                           | 17.7 (16.5-18.9) | 14.8 (14.0-15.6) | 16.6 (15.7-17.5) | 15.0 (14.0-16.0) | 13.0 (0.0-31.1) | 15.9 (15.2-16.6) |
| >0-4.9                                                 | 32.8 (29.3-36.2) | 24.3 (21.9-26.6) | 30.0 (27.4-32.6) | 24.6 (21.7-27.3) | 5.0 (0.0-14.1)  | 27.9 (26.0-29.8) |
| 5.0-14.9                                               | 33.6 (30.5-36.6) | 28.8 (26.6-31.0) | 31.6 (29.3-33.7) | 29.6 (26.7-32.3) | 7.3 (0.0-14.2)  | 31.0 (29.2-32.7) |
| 15.0-24.9                                              | 41.1 (31.3-49.4) | 37.0 (30.8-42.7) | 39.9 (33.1-46.1) | 35.8 (28.0-42.7) | 16.7 (0.0-35.3) | 38.2 (33.2-42.8) |
| ≥25.0                                                  | 40.5 (29.2-50.0) | 37.9 (29.1-45.6) | 43.1 (33.5-51.3) | 33.2 (23.6-41.6) | 0.0 (0.0-0.0)   | 39.4 (32.6-45.6) |
| <b>Cumulative dose in last year, mg</b>                |                  |                  |                  |                  |                 |                  |
| nonuse (ref)                                           | 15.0 (13.8-16.1) | 12.0 (11.3-12.7) | 13.7 (12.9-14.6) | 12.3 (11.4-13.1) | 18.1 (0.0-42.8) | 13.1 (12.5-13.7) |
| >0-959.9                                               | 33.2 (28.9-37.3) | 32.8 (29.3-36.2) | 33.4 (29.9-36.7) | 32.8 (28.3-37.0) | 1.9 (0.0-5.4)   | 33.2 (30.5-35.8) |



|                                                   |                  |                  |                  |                  |                 |                  |
|---------------------------------------------------|------------------|------------------|------------------|------------------|-----------------|------------------|
| 960.0-3,054.9                                     | 39.5 (35.1-43.7) | 40.9 (37.4-44.1) | 40.1 (36.8-43.2) | 41.1 (36.3-45.5) | 7.3 (0.1-14.0)  | 40.5 (37.8-43.1) |
| ≥3,055.0                                          | 56.3 (41.9-67.2) | 47.5 (39.4-54.5) | 48.6 (40.2-55.8) | 51.6 (40.3-60.7) | 12.7 (0.0-28.2) | 50.7 (43.9-56.7) |
| <b>Total cumulative dose, mg</b>                  |                  |                  |                  |                  |                 |                  |
| nonuse (ref)                                      | 25.3 (21.8-28.7) | 22.2 (19.9-24.3) | 23.9 (21.2-26.6) | 22.8 (20.1-25.3) | 3.3 (0.0-9.5)   | 23.4 (21.5-25.3) |
| >0-959.9                                          | 27.5 (23.8-31.0) | 24.0 (21.5-26.5) | 27.6 (24.8-30.4) | 23.2 (20.2-26.1) | 4.3 (0.0-12.3)  | 25.8 (23.8-27.8) |
| 960.0-3,054.9                                     | 26.6 (24.2-29.0) | 21.5 (19.8-23.2) | 25.3 (23.4-27.1) | 21.2 (19.1-23.2) | 4.0 (0.0-8.4)   | 23.7 (22.3-25.1) |
| 3,055.0-7,299.9                                   | 24.1 (22.1-26.0) | 19.6 (18.2-21.0) | 22.4 (20.9-23.9) | 20.2 (18.4-21.9) | 17.6 (0.0-37.0) | 21.6 (20.4-22.7) |
| ≥7,300.0                                          | 19.2 (17.2-21.1) | 14.4 (13.2-15.6) | 17.5 (16.2-18.9) | 13.9 (12.4-15.3) | 0.0 (0.0- 0.0)  | 16.1 (15.1-17.1) |
| <b>Parasitic infections</b>                       |                  |                  |                  |                  |                 |                  |
| Incident infections, n (%)                        | 587              | 533              | 766              | 354              | 4               | 1116             |
| <b>Cumulative probability (95% CI) at 1 year</b>  |                  |                  |                  |                  |                 |                  |
|                                                   | 1.2 (1.1-1.4)    | 0.7 (0.5-0.8)    | 1.1 (0.9-1.2)    | 0.7 (0.5-0.8)    | 0.9 (0.0-2.2)   | 0.9 (0.8-1.0)    |
| <b>Current daily dose, mg</b>                     |                  |                  |                  |                  |                 |                  |
| nonuse (ref)                                      | 0.9 (0.6-1.1)    | 0.4 (0.3-0.5)    | 0.7 (0.5-0.8)    | 0.5 (0.3-0.7)    | 1.2 (0.0-3.6)   | 0.6 (0.5-0.7)    |
| >0-4.9                                            | 0.9 (0.6-1.2)    | 0.7 (0.4-1.0)    | 0.8 (0.6-1.1)    | 0.7 (0.4-1.0)    | 0.0 (0.0-0.0)   | 0.8 (0.6-1.0)    |
| 5.0-14.9                                          | 1.4 (1.1-1.7)    | 0.9 (0.6-1.1)    | 1.4 (1.1-1.6)    | 0.7 (0.5-1.0)    | 1.5 (0.0-4.4)   | 1.1 (0.9-1.3)    |
| 15.0-24.9                                         | 3.0 (2.0-3.9)    | 0.9 (0.3-1.5)    | 2.6 (1.8-3.4)    | 0.9 (0.2-1.5)    | 0.0 (0.0-0.0)   | 2.0 (1.4-2.6)    |
| ≥25.0                                             | 2.3 (1.0-3.6)    | 1.7 (0.4-2.9)    | 1.9 (0.8-3.0)    | 2.3 (0.6-3.9)    | 0.0 (0.0-0.0)   | 2.1 (1.1-3.0)    |
| <b>Cumulative dose in last year, mg</b>           |                  |                  |                  |                  |                 |                  |
| nonuse (ref)                                      | 0.2 (0.2-0.3)    | 0.1 (0.1-0.2)    | 0.2 (0.1-0.3)    | 0.2 (0.1-0.2)    | 1.0 (0.0-2.8)   | 0.2 (0.1-0.2)    |
| >0-959.9                                          | 4.5 (3.3-5.6)    | 2.3 (1.3-3.3)    | 4.1 (3.0-5.1)    | 2.4 (1.2-3.7)    | 0.0 (0.0-0.0)   | 3.7 (2.8-4.5)    |
| 960.0-3,054.9                                     | 5.7 (4.5-6.9)    | 5.5 (4.1-6.9)    | 5.9 (4.8-7.0)    | 5.0 (3.4-6.5)    | 2.0 (0.0-5.9)   | 5.7 (4.8-6.6)    |
| ≥3055.0                                           | 8.3 (5.7-10.9)   | 7.3 (4.1-10.3)   | 8.3 (5.9-10.8)   | 6.9 (3.4-10.3)   | 0.0 (0.0-0.0)   | 8.0 (6.0-10.0)   |
| <b>Total cumulative dose, mg</b>                  |                  |                  |                  |                  |                 |                  |
| nonuse                                            | 1.5 (1.0-2.0)    | 0.7 (0.4-0.9)    | 1.2 (0.8-1.5)    | 0.8 (0.5-1.2)    | 3.3 (0.0-9.5)   | 1.0 (0.8-1.3)    |
| >0-959.9                                          | 2.5 (1.8-3.1)    | 0.8 (0.5-1.2)    | 2.0 (1.5-2.5)    | 0.8 (0.4-1.3)    | 0.0 (0.0-0.0)   | 1.6 (1.2-2.0)    |
| 960.0-3,054.9                                     | 1.4 (1.1-1.7)    | 0.9 (0.7-1.1)    | 1.3 (1.0-1.5)    | 0.9 (0.6-1.2)    | 1.4 (0.0-4.1)   | 1.1 (1.0-1.3)    |
| 3,055.0-7,299.9                                   | 0.6 (0.4-0.8)    | 0.4 (0.3-0.6)    | 0.6 (0.4-0.7)    | 0.4 (0.2-0.5)    | 0.0 (0.0-0.0)   | 0.5 (0.4-0.6)    |
| ≥7,300.0                                          | 0.7 (0.1-1.3)    | 0.2 (0.0-0.5)    | 0.6 (0.1-1.0)    | 0.2 (0.0-0.5)    | 0.0 (0.0-0.0)   | 0.4 (0.1-0.8)    |
| <b>Cumulative probability (95% CI) at 5 years</b> |                  |                  |                  |                  |                 |                  |
|                                                   | 3.4 (3.1-3.7)    | 2.2 (2.0-2.5)    | 3.1 (2.9-3.4)    | 2.2 (1.9-2.5)    | 2.7 (0.0-5.4)   | 2.8 (2.6-3.0)    |
| <b>Current daily dose, mg</b>                     |                  |                  |                  |                  |                 |                  |
| nonuse (ref)                                      | 2.2 (1.9-2.6)    | 1.6 (1.3-1.8)    | 2.0 (1.8-2.3)    | 1.6 (1.3-1.9)    | 2.9 (0.0-6.9)   | 1.9 (1.7-2.0)    |
| >0-4.9                                            | 3.4 (2.6-4.2)    | 3.2 (2.5-4.0)    | 3.4 (2.7-4.1)    | 3.2 (2.2-4.1)    | 5.0 (0.0-14.1)  | 3.3 (2.7-3.8)    |
| 5.0-14.9                                          | 5.6 (4.7-6.5)    | 3.4 (2.8-4.1)    | 5.2 (4.4-5.9)    | 3.2 (2.4-4.0)    | 1.9 (0.0-5.6)   | 4.5 (4.0-5.1)    |

|                                                        |                 |                  |                 |                 |                |                 |
|--------------------------------------------------------|-----------------|------------------|-----------------|-----------------|----------------|-----------------|
| 15.0-24.9                                              | 8.6 (5.9-11.2)  | 4.3 (2.5-6.1)    | 7.7 (5.6-9.8)   | 3.6 (1.4-5.8)   | 0.0 (0.0-0.0)  | 6.5 (4.9-8.0)   |
| ≥25.0                                                  | 9.6 (5.2-13.7)  | 4.8 (1.9-7.5)    | 7.0 (3.9-10.0)  | 7.4 (2.8-11.8)  | 0.0 (0.0-0.0)  | 7.2 (4.6-9.7)   |
| <b>Cumulative dose in last year, mg</b>                |                 |                  |                 |                 |                |                 |
| nonuse (ref)                                           | 1.3 (1.1-1.6)   | 1.0 ( 0.8- 1.2)  | 1.2 (1.0-1.4)   | 1.0 (0.8-1.2)   | 1.6 (0.0-4.8)  | 1.1 (1.0-1.3)   |
| >0-959.9                                               | 5.7 (4.5-7.0)   | 5.0 ( 3.6- 6.4)  | 6.0 (4.8-7.2)   | 4.1 (2.7-5.4)   | 3.3 (0.0-9.5)  | 5.4 (4.5-6.4)   |
| 960.0-3,054.9                                          | 9.3 (7.6-11.0)  | 9.0 ( 7.2-10.9)  | 9.2 (7.7-10.6)  | 9.2 (6.7-11.6)  | 4.0 (0.0-9.7)  | 9.2 (7.9-10.4)  |
| ≥3,055.0                                               | 14.8 (9.7-19.6) | 11.6 ( 6.9-16.0) | 13.9 (9.8-17.7) | 12.1 (5.0-18.8) | 0.0 (0.0-0.0)  | 13.4 (9.9-16.7) |
| <b>Total cumulative dose, mg</b>                       |                 |                  |                 |                 |                |                 |
| nonuse (ref)                                           | 4.5 (3.3-5.6)   | 2.7 (2.0-3.4)    | 3.9 (3.0-4.8)   | 2.7 (1.9-3.5)   | 3.3 (0.0-9.5)  | 3.3 (2.7-3.9)   |
| >0-959.9                                               | 5.4 (4.2-6.6)   | 2.7 (1.9-3.4)    | 4.9 (3.9-5.9)   | 2.3 (1.5-3.1)   | 0.0 (0.0-0.0)  | 3.9 (3.2-4.6)   |
| 960.0-3,054.9                                          | 4.3 (3.6-5.1)   | 2.9 (2.3-3.5)    | 3.9 (3.3-4.5)   | 3.0 (2.3-3.7)   | 1.7 (0.0-4.9)  | 3.6 (3.1-4.1)   |
| 3,055.0-7,299.9                                        | 3.1 (2.5-3.6)   | 2.5 (2.1-3.0)    | 3.1 (2.6-3.6)   | 2.2 (1.7-2.7)   | 3.7 (0.0-8.6)  | 2.8 (2.4-3.1)   |
| ≥7,300.0                                               | 1.9 (1.4-2.3)   | 1.1 (0.8-1.4)    | 1.6 (1.2-1.9)   | 1.2 (0.8-1.6)   | 0.0 (0.0-0.0)  | 1.4 (1.2-1.7)   |
| <b>Cumulative probability (95% CI)<br/>at 10 years</b> |                 |                  |                 |                 |                |                 |
|                                                        | 5.3 (4.7-5.8)   | 3.5 (3.2-3.9)    | 4.8 (4.4-5.2)   | 3.4 (3.0-3.8)   | 2.7 (0.0-5.4)  | 4.2 (4.0-4.5)   |
| <b>Current daily dose, mg</b>                          |                 |                  |                 |                 |                |                 |
| nonuse (ref)                                           | 3.6 (3.0-4.1)   | 2.6 (2.2-2.9)    | 3.2 (2.8-3.6)   | 2.7 (2.2-3.1)   | 2.9 (0.0-6.9)  | 3.0 (2.7-3.3)   |
| >0-4.9                                                 | 5.5 (4.0-6.9)   | 5.2 (4.0-6.3)    | 5.4 (4.2-6.5)   | 5.2 (3.7-6.6)   | 5.0 (0.0-14.1) | 5.3 (4.4-6.2)   |
| 5.0-14.9                                               | 9.3 (7.1-11.4)  | 5.2 (4.1-6.2)    | 8.5 (7.1-10.0)  | 4.0 (3.0-5.0)   | 1.9 (0.0-5.6)  | 6.8 (5.8-7.8)   |
| 15.0-24.9                                              | 11.8 (5.6-17.7) | 7.8 (4.2-11.2)   | 11.7 (7.1-16.1) | 6.1 (2.4-9.6)   | 0.0 (0.0-0.0)  | 9.7 (6.7-12.5)  |
| ≥25.0                                                  | 10.9 (3.9-17.4) | 11.5 ( 5.5-17.1) | 8.2 (4.3-12.0)  | 17.9 (7.3-27.2) | 0.0 (0.0-0.0)  | 11.6 (7.0-16.0) |
| <b>Cumulative dose in last year, mg</b>                |                 |                  |                 |                 |                |                 |
| nonuse (ref)                                           | 2.8 (2.4-3.3)   | 2.0 (1.7-2.3)    | 2.5 (2.1-2.8)   | 2.1 (1.7-2.4)   | 1.6 (0.0-4.8)  | 2.3 (2.0-2.5)   |
| >0-959.9                                               | 6.8 (4.8-8.8)   | 6.4 (4.7-8.1)    | 6.8 (5.2-8.3)   | 6.4 (4.2-8.6)   | 3.3 (0.0-9.5)  | 6.7 (5.4-7.9)   |
| 960.0-3,054.9                                          | 12.1 (8.4-15.6) | 9.5 (7.4-11.5)   | 11.9 (9.3-14.4) | 7.8 (5.6-10.0)  | 4.0 (0.0-9.7)  | 10.4 (8.6-12.2) |
| ≥3,055.0                                               | 14.1 (2.4-24.5) | 8.7 (5.8-11.5)   | 12.5 (5.4-19.0) | 7.8 ( 4.5-11.0) | 0.0 (0.0-0.0)  | 10.7 (6.5-14.6) |
| <b>Total cumulative dose, mg</b>                       |                 |                  |                 |                 |                |                 |
| nonuse (ref)                                           | 5.5 (4.0-7.0)   | 4.7 (3.6-5.9)    | 6.1 (4.5-7.6)   | 4.3 (3.0-5.5)   | 3.3 (0.0-9.5)  | 5.2 (4.2-6.2)   |
| >0-959.9                                               | 8.1 (5.9-10.3)  | 4.2 (3.0-5.3)    | 7.4 (5.8-9.0)   | 3.5 (2.2-4.8)   | 0.0 (0.0-0.0)  | 5.8 (4.7-6.8)   |
| 960.0-3,054.9                                          | 6.2 (4.9-7.4)   | 4.3 (3.4-5.1)    | 5.4 (4.5-6.3)   | 4.7 (3.6-5.8)   | 1.7 (0.0-4.9)  | 5.2 (4.5-5.9)   |
| 3,055.0-7,299.9                                        | 4.7 (3.7-5.6)   | 3.6 (3.0-4.3)    | 4.4 (3.7-5.1)   | 3.4 (2.6-4.2)   | 3.7 (0.0-8.6)  | 4.0 (3.5-4.5)   |
| ≥7,300.0                                               | 3.9 (2.9-4.8)   | 2.4 (1.9-2.8)    | 3.3 (2.7-3.9)   | 2.3 (1.7-2.9)   | 0.0 (0.0-0.0)  | 2.9 (2.5-3.3)   |
| <b>Fungal infections</b>                               |                 |                  |                 |                 |                |                 |
| Incident infections, n (%)                             | 2674            | 2742             | 3497            | 1919            | 9              | 5407            |

|                                                       |                  |                  |                  |                  |                 |                  |
|-------------------------------------------------------|------------------|------------------|------------------|------------------|-----------------|------------------|
| <b>Cumulative probability (95% CI)<br/>at 1 year</b>  | 4.8 (4.5-5.1)    | 3.0 (2.8-3.3)    | 4.3 (4.0-4.5)    | 3.2 (2.9-3.5)    | 2.5 (0.5-4.4)   | 3.9 (3.7-4.1)    |
| <b>Current daily dose, mg</b>                         |                  |                  |                  |                  |                 |                  |
| nonuse (ref)                                          | 3.1 (2.7-3.5)    | 1.9 (1.6-2.2)    | 2.7 (2.3-3.0)    | 2.1 (1.7-2.5)    | 4.9 (0.1-9.5)   | 2.4 (2.2-2.7)    |
| >0-4.9                                                | 4.6 (3.9-5.2)    | 3.5 (2.9-4.0)    | 4.2 (3.7-4.8)    | 3.6 (2.9-4.3)    | 4.0 (0.0-9.3)   | 4.0 (3.6-4.5)    |
| 5.0-14.9                                              | 5.9 (5.3-6.5)    | 3.5 (3.0-4.0)    | 5.1 (4.6-5.6)    | 4.0 (3.4-4.6)    | 0.0 (0.0-0.0)   | 4.8 (4.4-5.1)    |
| 15.0-24.9                                             | 8.9 (7.2-10.5)   | 5.7 (4.3-7.1)    | 8.9 (7.4-10.4)   | 4.6 (3.1-6.0)    | 0.0 (0.0-0.0)   | 7.4 (6.3-8.5)    |
| ≥25.0                                                 | 8.5 (6.0-10.9)   | 8.5 (5.9-11.1)   | 8.7 (6.4-10.9)   | 8.2 (5.1-11.2)   | 0.0 (0.0-0.0)   | 8.6 (6.8-10.4)   |
| <b>Cumulative dose in last year, mg</b>               |                  |                  |                  |                  |                 |                  |
| nonuse (ref)                                          | 1.0 (0.8-1.2)    | 0.7 (0.6-0.9)    | 0.9 (0.7-1.0)    | 0.8 (0.7-1.0)    | 3.0 (0.0-6.2)   | 0.8 (0.7-0.9)    |
| >0-959.9                                              | 13.8 (12.0-15.6) | 11.6 (9.6-13.6)  | 13.2 (11.6-14.8) | 12.2 (9.8-14.6)  | 4.1 (0.0-9.5)   | 13.1 (11.7-14.4) |
| 960.0-3,054.9                                         | 20.8 (18.9-22.7) | 19.6 (17.4-21.7) | 20.5 (18.8-22.2) | 19.8 (17.2-22.3) | 1.3 (0.0-3.9)   | 20.6 (19.2-22.1) |
| ≥3,055.0                                              | 25.2 (21.2-28.9) | 23.0 (18.2-27.6) | 26.4 (22.5-30.0) | 20.1 (15.1-24.8) | 0.0 (0.0-0.0)   | 24.6 (21.6-27.6) |
| <b>Total cumulative dose, mg</b>                      |                  |                  |                  |                  |                 |                  |
| nonuse (ref)                                          | 5.7 (4.8-6.6)    | 3.4 (2.8-4.0)    | 4.8 (4.1-5.5)    | 3.7 (3.0-4.5)    | 9.9 (0.0-19.9)  | 4.3 (3.8-4.8)    |
| >0-959.9                                              | 8.8 (7.6-10.0)   | 4.7 (3.9-5.5)    | 7.4 (6.5-8.4)    | 5.2 (4.1-6.2)    | 6.9 (0.0-15.7)  | 6.6 (5.9-7.3)    |
| 960.0-3,054.9                                         | 6.1 (5.5-6.7)    | 4.2 (3.7-4.7)    | 5.6 (5.1-6.1)    | 4.4 (3.8-5.1)    | 1.1 (0.0-3.1)   | 5.2 (4.8-5.6)    |
| 3,055.0-7,299.9                                       | 2.2 (1.9-2.6)    | 1.5 (1.2-1.8)    | 2.1 (1.8-2.4)    | 1.4 (1.0-1.7)    | 0.0 (0.0-0.0)   | 1.8 (1.6-2.1)    |
| ≥7,300.0                                              | 1.7 (0.7-2.7)    | 1.2 (0.4-1.9)    | 1.3 (0.6-2.0)    | 1.7 (0.6-2.8)    | 0.0 (0.0-0.0)   | 1.4 (0.8-2.0)    |
| <b>Cumulative probability (95% CI)<br/>at 5 years</b> | 15.8 (15.2-16.4) | 11.9 (11.4-12.4) | 14.4 (13.9-15.0) | 12.5 (11.8-13.1) | 7.4 (0.2-14.2)  | 13.7 (13.3-14.1) |
| <b>Current daily dose, mg</b>                         |                  |                  |                  |                  |                 |                  |
| nonuse (ref)                                          | 10.3 (9.6-11.0)  | 8.6 (8.1-9.2)    | 9.7 (9.2-10.3)   | 8.8 (8.2-9.5)    | 10.7 (0.0-22.5) | 9.4 (8.9-9.8)    |
| >0-4.9                                                | 21.9 (20.0-23.8) | 15.6 (14.0-17.1) | 19.3 (17.8-20.8) | 17.0 (15.0-18.9) | 11.9 (0.0-22.9) | 18.5 (17.3-19.7) |
| 5.0-14.9                                              | 23.0 (21.4-24.6) | 17.9 (16.4-19.3) | 20.8 (19.4-22.1) | 19.8 (17.9-21.6) | 0.0 (0.0-0.0)   | 20.5 (19.5-21.6) |
| 15.0-24.9                                             | 31.8 (27.0-36.3) | 23.8 (19.7-27.6) | 29.4 (25.6-33.0) | 24.2 (18.8-29.2) | 0.0 (0.0-0.0)   | 27.8 (24.7-30.8) |
| ≥25.0                                                 | 29.5 (23.2-35.2) | 24.1 (18.6-29.3) | 28.0 (22.7-32.9) | 24.2 (17.6-30.3) | 0.0 (0.0-0.0)   | 26.8 (22.7-30.7) |
| <b>Cumulative dose in last year, mg</b>               |                  |                  |                  |                  |                 |                  |
| nonuse (ref)                                          | 7.0 (6.4-7.5)    | 5.8 (5.3-6.2)    | 6.4 (6.0-6.9)    | 6.0 (5.56.5)     | 13.0 (0.0-27.3) | 6.3 (5.9-6.6)    |
| >0-959.9                                              | 26.2 (23.7-28.5) | 27.3 (24.4-30.1) | 25.4 (23.2-27.6) | 29.6 (26.0-33.0) | 3.6 (0.0-8.5)   | 26.8 (24.9-28.6) |
| 960.0-3,054.9                                         | 36.3 (33.6-38.8) | 37.6 (34.7-40.3) | 36.6 (34.3-38.9) | 37.5 (34.0-40.8) | 5.6 (0.0-11.9)  | 37.0 (35.0-38.9) |
| ≥3,055.0                                              | 47.1 (40.5-52.9) | 43.0 (36.3-49.0) | 43.7 (38.3-48.7) | 48.6 (39.5-56.4) | 0.0 (0.0-0.0)   | 45.3 (40.7-49.6) |
| <b>Total cumulative dose, mg</b>                      |                  |                  |                  |                  |                 |                  |
| nonuse (ref)                                          | 16.6 (14.6-18.6) | 14.7 (13.1-16.2) | 16.2 (14.5-17.8) | 14.8 (13.0-16.5) | 9.9 (0.0-19.9)  | 15.6 (14.3-16.8) |
| >0-959.9                                              | 21.0 (18.8-23.1) | 14.2 (12.6-15.9) | 18.8 (17.0-20.5) | 15.0 (13.0-16.9) | 100.0 (NA-NA)   | 17.3 (15.9-18.6) |

|                                                        |                  |                  |                  |                  |                  |                  |
|--------------------------------------------------------|------------------|------------------|------------------|------------------|------------------|------------------|
| 960.0-3,054.9                                          | 20.5 (19.0-21.9) | 15.6 (14.3-16.8) | 19.2 (18.0-20.4) | 15.9 (14.3-17.4) | 4.2 (0.0-10.2)   | 18.1 (17.1-19.0) |
| 3,055.0-7,299.9                                        | 15.2 (14.1-16.4) | 12.4 (11.4-13.4) | 14.3 (13.4-15.3) | 12.8 (11.6-14.0) | 2.0 (0.0-5.9)    | 13.8 (13.1-14.6) |
| ≥7,300.0                                               | 9.1 (8.1-10.1)   | 6.2 (5.5-6.9)    | 7.8 (7.1-8.6)    | 6.8 (5.9-7.8)    | 0.0 (0.0-0.0)    | 7.5 (6.9-8.1)    |
| <b>Cumulative probability (95% CI)<br/>at 10 years</b> | 24.4 (23.3-25.4) | 19.0 (18.3-19.7) | 22.5 (21.7-23.2) | 19.4 (18.5-20.2) | 7.4 ( 0.2-14.2)  | 21.2 (20.6-21.8) |
| <b>Current daily dose, mg</b>                          |                  |                  |                  |                  |                  |                  |
| nonuse (ref)                                           | 18.1 (16.9-19.3) | 15.0 (14.2-15.8) | 16.9 (16.0-17.8) | 15.3 (14.3-16.3) | 10.7 (0.0-22.5)  | 16.2 (15.5-16.9) |
| >0-4.9                                                 | 33.6 (30.0-37.0) | 25.0 (22.6-27.3) | 30.8 (28.2-33.4) | 25.1 (22.2-27.9) | 11.9 (0.0-22.9)  | 28.6 (26.6-30.4) |
| 5.0-14.9                                               | 32.2 (29.3-35.0) | 26.9 (24.8-29.0) | 29.9 (27.8-31.9) | 28.5 (25.8-31.1) | 0.0 (0.0-0.0)    | 29.5 (27.8-31.1) |
| 15.0-24.9                                              | 40.4 (33.3-46.8) | 32.3 (26.7-37.4) | 39.8 (34.1-45.0) | 29.6 (23.0-35.7) | 0.0 (0.0-0.0)    | 36.2 (31.9-40.2) |
| ≥25.0                                                  | 43.0 (30.8-53.1) | 33.0 (25.3-40.0) | 38.1 (29.8-45.4) | 35.0 (24.8-43.9) | 0.0 (0.0-0.0)    | 37.0 (30.7-42.7) |
| <b>Cumulative dose in last year, mg</b>                |                  |                  |                  |                  |                  |                  |
| nonuse (ref)                                           | 15.3 (14.2-16.5) | 12.1 (11.4-12.9) | 14.1 (13.2-14.9) | 12.4 (11.5-13.2) | 13.0 ( 0.0-27.3) | 13.3 (12.7-13.9) |
| >0-959.9                                               | 33.0 (28.9-36.9) | 32.7 (29.3-36.0) | 32.5 (29.2-35.6) | 33.7 (29.4-37.8) | 3.6 (0.0-8.5)    | 33.0 (30.4-35.5) |
| 960.0-3,054.9                                          | 38.9 (34.6-43.0) | 37.0 (34.0-39.8) | 38.4 (35.4-41.2) | 36.7 (32.8-40.4) | 5.6 (0.0-11.9)   | 37.8 (35.5-40.1) |
| ≥3,055.0                                               | 51.2 (40.3-60.1) | 43.1 (34.7-50.5) | 43.4 (36.7-49.4) | 50.5 (38.9-60.0) | 0.0 (0.0-0.0)    | 47.0 (40.6-52.8) |
| <b>Total cumulative dose, mg</b>                       |                  |                  |                  |                  |                  |                  |
| nonuse (ref)                                           | 22.0 (18.8-25.0) | 23.1 (20.9-25.3) | 23.4 (20.9-25.9) | 22.7 (20.1-25.2) | 9.9 (0.0-19.9)   | 23.2 (21.4-25.0) |
| >0-959.9                                               | 30.3 (26.7-33.7) | 22.9 (20.5-25.3) | 28.7 (25.9-31.5) | 22.6 (19.7-25.4) | 100.0 (NA-NA)    | 26.1 (24.1-28.1) |
| 960.0-3,054.9                                          | 29.3 (26.9-31.7) | 23.1 (21.3-24.9) | 27.7 (25.8-29.5) | 23.3 (21.1-25.4) | 4.2 (0.0-10.2)   | 26.1 (24.7-27.5) |
| 3,055.0-7,299.9                                        | 24.1 (22.1-26.1) | 19.6 (18.2-21.0) | 22.2 (20.7-23.7) | 20.3 (18.5-22.1) | 2.0 (0.0-5.9)    | 21.6 (20.4-22.7) |
| ≥7,300.0                                               | 18.2 (16.3-20.1) | 12.9 (11.8-14.0) | 16.0 (14.7-17.3) | 13.1 (11.7-14.5) | 0.0 (0.0-0.0)    | 14.8 (13.8-15.8) |

Note: CI, confidence interval; IQR, interquartile range. Estimates are shown for time-variant prednisolone-equivalent dosage.

**Supplemental Table 11. Kaplan-Meier estimates of infections per level of current daily and cumulative oral glucocorticoid prednisolone-equivalent dose by use of inhaled, nasogastric and intramuscular glucocorticoids at baseline**

| All-cause infection                               | Non-oral GC use  |                  |                  |                   |                  |                     |
|---------------------------------------------------|------------------|------------------|------------------|-------------------|------------------|---------------------|
|                                                   | Inhaled GC       | No Inhaled GC    | Nasogastric GC   | No nasogastric GC | Intramuscular GC | No intramuscular GC |
| Incident infections, n (%)                        | 3324             | 18910            | 2001             | 20233             | 417              | 21817               |
| <b>Cumulative probability (95% CI) at 1 year</b>  | 24.9 (23.7-26.1) | 17.3 (16.9-17.7) | 23.9 (22.4-25.4) | 17.8 (17.4-18.2)  | 20.1 (17.3-22.9) | 18.3 (17.9-18.6)    |
| <b>Current daily dose, mg</b>                     |                  |                  |                  |                   |                  |                     |
| nonuse (ref)                                      | 17.1 (15.2-18.8) | 12.4 (11.8-12.9) | 16.9 (14.7-19.0) | 12.6 (12.0-13.1)  | 14.5 (10.3-18.5) | 12.9 (12.3-13.4)    |
| >0-4.9                                            | 24.9 (22.3-27.5) | 16.9 (16.0-17.8) | 25.7 (22.2-29.0) | 17.3 (16.4-18.2)  | 16.3 (10.5-21.7) | 18.0 (17.1-18.9)    |
| 5.0-14.9                                          | 27.7 (25.5-29.8) | 20.0 (19.2-20.8) | 26.0 (23.3-28.6) | 20.6 (19.9-21.4)  | 23.7 (18.4-28.6) | 21.0 (20.3-21.8)    |
| 15.0-24.9                                         | 37.2 (31.8-42.1) | 29.2 (27.2-31.2) | 31.9 (25.3-38.0) | 30.2 (28.3-32.1)  | 32.8 (19.4-43.9) | 30.3 (28.4-32.1)    |
| ≥25.0                                             | 44.7 (37.8-50.8) | 33.4 (30.2-36.5) | 50.0 (39.8-58.5) | 34.2 (31.1-37.1)  | 38.6 (17.7-54.1) | 35.8 (32.8-38.6)    |
| <b>Cumulative dose in last year, mg</b>           |                  |                  |                  |                   |                  |                     |
| nonuse (ref)                                      | 5.7 (4.9-6.5)    | 5.0 (4.7-5.3)    | 6.5 (5.4-7.6)    | 4.9 (4.7-5.2)     | 5.3 (3.3-7.3)    | 5.1 (4.8-5.3)       |
| >0-959.9                                          | 46.1 (42.1-49.8) | 37.5 (35.8-39.2) | 47.3 (42.2-51.9) | 38.0 (36.3-39.6)  | 41.1 (29.7-50.7) | 38.9 (37.3-40.4)    |
| 960.0-3,054.9                                     | 56.6 (53.3-59.6) | 47.7 (46.3-49.1) | 52.3 (48.1-56.3) | 48.8 (47.4-50.2)  | 47.0 (39.0-54.1) | 49.2 (47.9-50.5)    |
| ≥3,055.0                                          | 58.9 (53.2-63.9) | 60.5 (57.9-63.0) | 60.4 (52.5-66.9) | 60.2 (57.7-62.5)  | 36.3 (19.9-49.3) | 60.7 (58.4-63.0)    |
| <b>Total cumulative dose, mg</b>                  |                  |                  |                  |                   |                  |                     |
| nonuse (ref)                                      | 28.4 (24.6-32.0) | 19.8 (18.7-20.8) | 26.8 (22.5-30.9) | 20.1 (19.1-21.2)  | 26.8 (17.4-35.2) | 20.5 (19.5-21.5)    |
| >0-959.9                                          | 37.1 (33.6-40.4) | 27.5 (26.2-28.9) | 42.4 (37.7-46.8) | 27.7 (26.3-29.0)  | 34.8 (24.7-43.6) | 28.9 (27.6-30.2)    |
| 960.0-3,054.9                                     | 30.9 (28.7-33.0) | 20.5 (19.7-21.2) | 27.1 (24.4-29.7) | 21.4 (20.7-22.2)  | 25.4 (20.5-30.0) | 21.8 (21.1-22.5)    |
| 3,055.0-7,299.9                                   | 13.8 (12.1-15.4) | 9.7 (9.1-10.2)   | 12.4 (10.3-14.3) | 10.0 (9.5-10.6)   | 6.0 (3.0-8.9)    | 10.3 (9.8-10.8)     |
| ≥7,300.0                                          | 7.9 (4.0-11.7)   | 7.4 (5.8-8.9)    | 7.9 (2.1-13.3)   | 7.4 (5.9-8.9)     | 12.1 (0.2-22.6)  | 7.3 (5.9-8.8)       |
| <b>Cumulative probability (95% CI) at 5 years</b> | 66.3 (64.8-67.8) | 52.9 (52.3-53.6) | 64.1 (62.1-66.0) | 53.9 (53.3-54.4)  | 59.4 (54.9-63.4) | 54.6 (54.0-55.2)    |
| <b>Current daily dose, mg</b>                     |                  |                  |                  |                   |                  |                     |
| nonuse (ref)                                      | 51.5 (49.0-53.9) | 41.0 (40.2-41.8) | 51.2 (48.2-54.0) | 41.4 (40.6-42.2)  | 44.1 (37.9-49.7) | 42.0 (41.3-42.8)    |
| >0-4.9                                            | 75.0 (71.3-78.2) | 63.3 (61.7-64.8) | 70.7 (65.9-74.9) | 64.5 (62.9-65.9)  | 71.7 (58.8-80.5) | 64.9 (63.4-66.3)    |
| 5.0-14.9                                          | 76.7 (73.9-79.2) | 68.5 (67.3-69.8) | 77.3 (73.4-80.5) | 69.1 (67.9-70.3)  | 76.7 (67.3-83.4) | 69.7 (68.6-70.8)    |
| 15.0-24.9                                         | 81.3 (75.0-86.0) | 77.2 (74.4-79.7) | 84.0 (74.9-89.8) | 77.3 (74.7-79.7)  | 88.5 (36.7-97.9) | 77.8 (75.3-80.0)    |
| ≥25.0 mg                                          | 87.1 (81.1-91.2) | 79.2 (75.2-82.6) | 93.6 (82.2-97.7) | 80.1 (76.6-83.1)  | 90.4 (42.9-98.4) | 81.3 (78.0-84.1)    |
| <b>Cumulative dose in last year</b>               |                  |                  |                  |                   |                  |                     |
| nonuse (ref)                                      | 37.1 (34.6-39.4) | 32.1 (31.3-32.9) | 40.0 (37.0-42.8) | 32.0 (31.3-32.8)  | 37.0 (30.7-42.8) | 32.5 (31.8-33.2)    |
| >0-959.9                                          | 81.2 (77.6-84.2) | 73.5 (71.8-75.1) | 80.5 (75.7-84.4) | 74.3 (72.6-75.8)  | 64.7 (51.5-74.3) | 75.1 (73.5-76.5)    |

|                                                    |                  |                  |                  |                  |                    |                  |
|----------------------------------------------------|------------------|------------------|------------------|------------------|--------------------|------------------|
| 960.0-3,054.9                                      | 89.7 (87.3-91.6) | 83.4 (82.3-84.5) | 87.8 (84.2-90.5) | 84.1 (83.0-85.2) | 89.3 ( 80.4- 94.2) | 84.4 (83.3-85.4) |
| ≥3,055.0                                           | 93.4 (89.7-95.8) | 92.4 (90.5-93.9) | 96.1 (90.1-98.4) | 92.3 (90.5-93.7) | 100.0 ( NA- NA)    | 92.6 (91.0-93.9) |
| <b>Total cumulative dose, mg</b>                   |                  |                  |                  |                  |                    |                  |
| nonuse (ref)                                       | 73.7 (68.4-78.1) | 57.3 (55.7-58.9) | 69.2 (63.2-74.2) | 57.9 (56.2-59.5) | 60.2 (44.6-71.4)   | 58.7 (57.1-60.2) |
| >0-959.9                                           | 73.6 (69.6-77.1) | 60.4 (58.7-62.1) | 74.6 (69.3-79.0) | 61.2 (59.5-62.8) | 69.8 (56.4-79.1)   | 62.2 (60.6-63.8) |
| 960.0-3,054.9                                      | 74.0 (71.2-76.6) | 59.6 (58.4-60.8) | 74.2 (70.3-77.5) | 60.6 (59.4-61.7) | 61.9 (53.1-69.1)   | 61.7 (60.5-62.8) |
| 3,055.0-7,299.9                                    | 66.6 (63.6-69.4) | 53.6 (52.4-54.7) | 62.5 (58.6-65.9) | 54.5 (53.4-55.6) | 54.9 (46.7-61.8)   | 55.2 (54.1-56.2) |
| ≥7,300.0                                           | 46.5 (42.9-50.0) | 34.4 (33.1-35.7) | 41.3 (36.5-45.7) | 35.6 (34.3-36.9) | 51.3 (39.0-61.2)   | 35.8 (34.6-37.1) |
| <b>Cumulative probability (95% CI) at 10 years</b> |                  |                  |                  |                  |                    |                  |
|                                                    | 85.9 (84.3-87.3) | 75.6 (74.9-76.2) | 84.0 (81.7-85.9) | 76.3 (75.6-76.9) | 84.8 (76.1-90.4)   | 76.8 (76.2-77.4) |
| <b>Current daily dose, mg</b>                      |                  |                  |                  |                  |                    |                  |
| nonuse (ref)                                       | 77.2 (74.3-79.8) | 67.0 (66.0-68.0) | 77.0 (73.4-80.1) | 67.3 (66.3-68.3) | 81.0 (67.8-88.8)   | 67.9 (66.9-68.8) |
| >0-4.9                                             | 90.3 (86.5-93.1) | 83.4 (81.7-84.9) | 86.3 (80.8-90.3) | 84.2 (82.6-85.7) | 85.8 (62.4-94.7)   | 84.3 (82.8-85.7) |
| 5.0-14.9                                           | 91.8 (89.3-93.8) | 88.1 (86.8-89.2) | 91.7 (87.3-94.5) | 88.4 (87.2-89.5) | 81.2 (69.0-88.6)   | 88.7 (87.6-89.8) |
| 15.0-24.9                                          | 96.4 (88.8-98.8) | 91.6 (88.8-93.6) | 95.3 (83.8-98.6) | 92.0 (89.4-93.9) | 88.5 (36.7-97.9)   | 92.3 (89.8-94.1) |
| ≥25.0                                              | 94.2 (88.3-97.1) | 92.6 (88.7-95.1) | 95.6 (84.4-98.8) | 92.7 (89.4-95.0) | 100.0 (NA-NA)      | 93.0 (90.0-95.1) |
| <b>Cumulative dose in last year, mg</b>            |                  |                  |                  |                  |                    |                  |
| nonuse (ref)                                       | 70.4 (67.0-73.5) | 61.8 (60.7-62.8) | 71.8 (67.8-75.3) | 61.9 (60.8-62.9) | 78.2 (63.1-87.1)   | 62.4 (61.4-63.4) |
| >0-959.9                                           | 90.6 (86.9-93.3) | 88.2 (86.4-89.8) | 88.6 (82.4-92.6) | 88.6 (87.0-90.1) | 100.0 (NA-NA)      | 88.7 (87.1-90.1) |
| 960.0-3,054.9                                      | 94.8 (92.5-96.4) | 92.8 (91.6-93.8) | 94.7 (91.1-96.8) | 92.9 (91.8-93.9) | 88.5 (76.8-94.3)   | 93.1 (92.1-94.0) |
| ≥3,055.0                                           | 98.9 (93.4-99.8) | 96.8 (95.0-97.9) | 95.5 (89.2-98.1) | 97.1 (95.5-98.1) | 100.0 (NA-NA)      | 97.2 (95.7-98.2) |
| <b>Total cumulative dose, mg</b>                   |                  |                  |                  |                  |                    |                  |
| nonuse (ref)                                       | 89.9 (84.1-93.5) | 78.3 (76.5-80.0) | 85.0 (78.2-89.7) | 78.8 (77.0-80.5) | 92.8 (61.8-98.6)   | 79.1 (77.3-80.7) |
| >0-959.9                                           | 88.3 (83.9-91.5) | 81.1 (79.2-82.9) | 91.1 (84.5-94.9) | 81.3 (79.5-83.0) | 85.0 (65.5-93.5)   | 82.1 (80.3-83.7) |
| 960.0-3,054.9                                      | 90.5 (87.5-92.8) | 79.8 (78.4-81.1) | 87.8 (83.3-91.0) | 80.7 (79.4-82.0) | 100.0 (NA-NA)      | 81.2 (79.9-82.4) |
| 3,055.0-7,299.9                                    | 84.8 (81.3-87.7) | 74.9 (73.6-76.1) | 85.9 (81.0-89.5) | 75.3 (74.1-76.5) | 75.2 (51.8-87.2)   | 76.1 (74.9-77.3) |
| ≥7,300.0                                           | 77.8 (73.9-81.2) | 65.8 (64.2-67.4) | 71.7 (66.0-76.4) | 67.0 (65.5-68.6) | 75.4 (56.6-86.1)   | 67.3 (65.8-68.7) |
| <b>Bacterial infections</b>                        |                  |                  |                  |                  |                    |                  |
| Incident infections, n (%)                         | 945              | 4289             | 412              | 4822             | 85                 | 5149             |
| <b>Cumulative probability (95% CI) at 1 year</b>   |                  |                  |                  |                  |                    |                  |
|                                                    | 4.9 (4.3-5.5)    | 2.9 (2.7-3.1)    | 2.9 (2.4-3.5)    | 3.2 (3.0-3.4)    | 3.3 (2.0-4.5)      | 3.2 (3.0-3.3)    |
| <b>Current daily dose, mg</b>                      |                  |                  |                  |                  |                    |                  |
| nonuse (ref)                                       | 2.9 ( 2.1- 3.7)  | 2.0 (1.7-2.2)    | 1.6 (0.9-2.3)    | 2.1 (1.9-2.4)    | 2.7 (0.8-4.6)      | 2.1 (1.8-2.3)    |
| >0-4.9                                             | 5.0 ( 3.7- 6.3)  | 3.2 (2.8-3.6)    | 3.2 (1.8-4.6)    | 3.5 (3.0-3.9)    | 4.3 (1.1-7.4)      | 3.4 (3.0-3.8)    |
| 5.0-14.9                                           | 4.8 ( 3.8- 5.9)  | 3.2 (2.9-3.6)    | 3.1 (2.0-4.2)    | 3.5 (3.2-3.9)    | 3.4 (1.2-5.5)      | 3.5 (3.1-3.8)    |

|                                                        |                  |                  |                  |                  |                  |                  |
|--------------------------------------------------------|------------------|------------------|------------------|------------------|------------------|------------------|
| 15.0-24.9                                              | 11.6 ( 7.9-15.1) | 5.5 (4.4-6.5)    | 5.9 (2.5-9.3)    | 6.4 (5.3-7.5)    | 4.1 (0.0-9.6)    | 6.4 (5.3-7.4)    |
| ≥25.0                                                  | 12.1 ( 7.5-16.5) | 6.8 (4.9-8.6)    | 12.5 (5.6-18.9)  | 7.4 (5.6-9.2)    | 0.0 (0.0-0.0)    | 8.2 (6.4-9.9)    |
| <b>Cumulative dose in last year, mg</b>                |                  |                  |                  |                  |                  |                  |
| nonuse (ref)                                           | 0.8 (0.5-1.1)    | 0.7 (0.6-0.8)    | 0.4 (0.2-0.7)    | 0.7 (0.6-0.8)    | 0.5 (0.0-1.0)    | 0.7 (0.6-0.8)    |
| >0-959.9                                               | 14.2 (10.5-17.7) | 10.8 (9.4-12.3)  | 10.8 (6.2-15.1)  | 11.4 (10.0-12.8) | 15.1 (4.0-24.8)  | 11.3 (9.9-12.6)  |
| 960.0-3,054.9                                          | 23.0 (19.1-26.8) | 16.0 (14.6-17.5) | 16.1 (11.4-20.6) | 17.2 (15.8-18.6) | 12.4 (5.4-18.9)  | 17.3 (15.9-18.7) |
| ≥3,055.0                                               | 25.1 (18.1-31.5) | 22.7 (19.2-26.1) | 22.0 (11.5-31.2) | 23.4 (20.2-26.6) | 13.3 (0.1-24.7)  | 23.6 (20.4-26.6) |
| <b>Total cumulative dose, mg</b>                       |                  |                  |                  |                  |                  |                  |
| nonuse (ref)                                           | 5.8 (3.8-7.8)    | 3.3 (2.8-3.8)    | 2.4 (0.9-3.8)    | 3.6 (3.1-4.1)    | 3.3 (0.0- 6.9)   | 3.5 (3.0-4.0)    |
| >0-959.9                                               | 6.9 (5.0-8.7)    | 5.1 (4.4-5.8)    | 5.1 (2.9-7.2)    | 5.4 (4.7-6.1)    | 7.5 (1.5-13.2)   | 5.3 (4.7-6.0)    |
| 960.0-3,054.9                                          | 6.5 (5.3-7.7)    | 3.6 (3.3-4.0)    | 4.2 (2.9-5.4)    | 4.0 (3.6-4.4)    | 3.9 (1.7- 6.1)   | 4.0 (3.7-4.4)    |
| 3,055.0-7,299.9                                        | 2.9 (2.1-3.6)    | 1.6 (1.3-1.8)    | 1.6 (0.9-2.3)    | 1.8 (1.5-2.0)    | 1.1 (0.0- 2.2)   | 1.8 (1.5-2.0)    |
| ≥7,300.0                                               | 1.3 (0.0-2.7)    | 0.5 (0.1-0.9)    | 0.0 (0.0-0.0)    | 0.7 (0.3-1.1)    | 5.4 (0.0-12.4)   | 0.5 (0.2-0.9)    |
| <b>Cumulative probability (95% CI)<br/>at 5 years</b>  |                  |                  |                  |                  |                  |                  |
|                                                        | 17.9 (16.6-19.1) | 10.7 (10.3-11.1) | 12.0 (10.7-13.3) | 11.6 (11.2-11.9) | 11.9 ( 9.0-14.7) | 11.6 (11.2-12.0) |
| <b>Current daily dose, mg</b>                          |                  |                  |                  |                  |                  |                  |
| nonuse (ref)                                           | 10.6 (9.2-12.0)  | 7.2 (6.8-7.6)    | 7.9 (6.5-9.3)    | 7.5 (7.1-7.9)    | 8.2 (5.1-11.3)   | 7.5 (7.1-7.9)    |
| >0-4.9                                                 | 27.1 (23.3-30.8) | 15.2 (14.0-16.4) | 17.6 (13.5-21.6) | 16.9 (15.7-18.1) | 17.5 (7.9-26.0)  | 17.0 (15.8-18.1) |
| 5.0-14.9                                               | 22.8 (19.8-25.7) | 16.6 (15.5-17.7) | 15.9 (12.3-19.3) | 17.8 (16.7-18.8) | 18.4 (10.3-25.7) | 17.6 (16.5-18.6) |
| 15.0-24.9                                              | 32.0 (24.7-38.5) | 21.7 (18.6-24.8) | 25.7 (15.3-34.9) | 23.5 (20.5-26.4) | 21.1 (0.0-40.0)  | 23.8 (20.9-26.6) |
| ≥25.0                                                  | 31.6 (22.8-39.4) | 27.2 (22.1-31.9) | 29.1 (15.0-40.9) | 28.2 (23.6-32.6) | 0.0 (0.0-0.0)    | 28.7 (24.3-32.9) |
| <b>Cumulative dose in last year, mg</b>                |                  |                  |                  |                  |                  |                  |
| nonuse (ref)                                           | 5.9 (4.9- 6.9)   | 4.8 (4.5-5.1)    | 5.0 (3.9- 6.1)   | 4.9 (4.6- 5.2)   | 5.2 (2.6-7.7)    | 4.9 (4.6-5.2)    |
| >0-959.9                                               | 29.8 (24.8-34.5) | 22.7 (20.7-24.7) | 24.6 (17.9-30.8) | 23.9 (22.0-25.9) | 16.7 (7.2-25.2)  | 24.2 (22.3-26.0) |
| 960.0-3,054.9                                          | 43.5 (38.3-48.4) | 30.9 (28.9-32.9) | 31.4 (24.3-37.7) | 33.3 (31.3-35.3) | 27.9 (16.7-37.6) | 33.3 (31.3-35.1) |
| ≥3,055.0                                               | 56.1 (46.3-64.0) | 48.5 (42.8-53.6) | 45.2 (29.8-57.3) | 50.9 (45.8-55.5) | 17.6 (4.8-28.6)  | 50.6 (45.8-55.1) |
| <b>Total cumulative dose, mg</b>                       |                  |                  |                  |                  |                  |                  |
| nonuse (ref)                                           | 18.5 (13.4-23.3) | 11.9 (10.7-13.0) | 8.6 (5.0-12.1)   | 12.6 (11.5-13.8) | 7.5 (0.0-15.2)   | 12.4 (11.3-13.5) |
| >0-959.9                                               | 18.5 (14.6-22.2) | 13.6 (12.3-14.8) | 15.0 (10.7-19.2) | 14.1 (12.9-15.4) | 17.8 (6.5-27.6)  | 14.2 (12.9-15.4) |
| 960.0-3,054.9                                          | 23.3 (20.3-26.2) | 13.2 (12.3-14.1) | 17.3 (13.8-20.6) | 14.3 (13.4-15.2) | 12.3 (6.2-18.0)  | 14.6 (13.7-15.5) |
| 3,055.0-7,299.9                                        | 18.8 (16.4-21.2) | 10.9 (10.2-11.6) | 13.9 (11.2-16.6) | 11.7 (11.0-12.4) | 12.4 (7.4-17.1)  | 11.8 (11.1-12.5) |
| ≥7,300.0                                               | 11.9 (10.0-13.8) | 6.4 (5.8-7.0)    | 6.4 (4.6-8.3)    | 7.3 (6.7-7.9)    | 9.0 (3.9-13.9)   | 7.2 (6.6-7.8)    |
| <b>Cumulative probability (95% CI)<br/>at 10 years</b> |                  |                  |                  |                  |                  |                  |
|                                                        | 31.4 (29.2-33.4) | 19.6 (19.0-20.3) | 22.4 (20.0-24.7) | 20.9 (20.3-21.6) | 23.9 (15.7-31.3) | 21.0 (20.4-21.6) |
| <b>Current daily dose, mg</b>                          |                  |                  |                  |                  |                  |                  |

|                                                  |                   |                      |                       |                          |                         |                            |
|--------------------------------------------------|-------------------|----------------------|-----------------------|--------------------------|-------------------------|----------------------------|
| nonuse (ref)                                     | 21.2 (18.7-23.6)  | 15.0 (14.3-15.7)     | 15.3 (12.7-17.7)      | 15.7 (15.0-16.4)         | 17.5 (7.0-26.9)         | 15.6 (14.9-16.3)           |
| >0-4.9                                           | 42.0 (36.1-47.3)  | 26.9 (24.8-28.9)     | 33.6 (26.3-40.1)      | 28.7 (26.6-30.7)         | 27.7 (10.2-41.7)        | 29.2 (27.2-31.1)           |
| 5.0-14.9                                         | 41.7 (36.1-46.7)  | 28.6 (26.7-30.5)     | 33.8 (25.8-40.9)      | 30.4 (28.5-32.2)         | 33.4 (18.7-45.5)        | 30.5 (28.7-32.3)           |
| 15.0-24.9                                        | 46.0 (33.8-55.9)  | 33.4 (28.2-38.1)     | 37.3 (17.8-52.2)      | 35.7 (30.8-40.2)         | 19.7 (0.0-37.4)         | 36.0 (31.3-40.4)           |
| ≥25.0                                            | 61.5 (41.5-74.7)  | 40.7 (32.4-48.0)     | 39.0 (13.5-57.0)      | 46.0 (38.0-53.0)         | 40.7 (0.0-74.2)         | 45.5 (37.9-52.3)           |
| <b>Cumulative dose in last year, mg</b>          |                   |                      |                       |                          |                         |                            |
| nonuse (ref)                                     | 16.1 (13.9-18.3)  | 12.4 (11.8-13.1)     | 12.2 (10.0-14.5)      | 12.8 (12.2-13.4)         | 12.6 (4.1-20.3)         | 12.8 (12.1-13.4)           |
| >0-959.9                                         | 38.2 (31.4-44.4)  | 31.9 (28.9-34.8)     | 34.1 (24.2-42.8)      | 33.0 (30.2-35.7)         | 46.9 (0.0-76.5)         | 33.1 (30.3-35.7)           |
| 960.0-3,054.9                                    | 56.4 (48.7-63.0)  | 38.8 (35.9-41.6)     | 51.6 (39.3-61.5)      | 40.8 (38.0-43.4)         | 38.7 (24.3-50.4)        | 41.7 (38.9-44.3)           |
| ≥3,055.0                                         | 64.8 (48.8-75.8)  | 51.3 (44.9-57.0)     | 48.8 (24.6-65.3)      | 54.9 (48.6-60.4)         | 36.3 (0.0-64.2)         | 54.6 (48.6-59.9)           |
| <b>Total cumulative dose, mg</b>                 |                   |                      |                       |                          |                         |                            |
| nonuse (ref)                                     | 38.5 (27.1-48.2)  | 21.3 (19.3-23.2)     | 19.1 (10.5-26.9)      | 22.5 (20.5-24.5)         | 39.9 (0.0-67.2)         | 22.2 (20.2-24.1)           |
| >0-959.9                                         | 30.1 (23.5-36.2)  | 21.6 (19.6-23.5)     | 24.4 (17.3-30.9)      | 22.4 (20.5-24.4)         | 24.1 (7.0-38.0)         | 22.5 (20.6-24.4)           |
| 960.0-3,054.9                                    | 34.8 (30.1-39.1)  | 22.6 (21.1-24.1)     | 24.9 (19.6-29.9)      | 24.1 (22.6-25.6)         | 12.9 (6.4-18.9)         | 24.3 (22.8-25.8)           |
| 3,055.0-7,299.9                                  | 30.9 (26.8-34.7)  | 19.6 (18.4-20.8)     | 24.2 (19.3-28.8)      | 20.7 (19.5-21.9)         | 24.0 (5.3-39.0)         | 21.0 (19.8-22.1)           |
| ≥7,300.0                                         | 27.4 (24.0-30.7)  | 15.8 (14.7-16.9)     | 18.7 (14.7-22.5)      | 17.3 (16.2-18.3)         | 21.6 (11.9-30.2)        | 17.3 (16.3-18.3)           |
| <b>Viral infections</b>                          | <b>Inhaled GC</b> | <b>No Inhaled GC</b> | <b>Nasogastric GC</b> | <b>No nasogastric GC</b> | <b>Intramuscular GC</b> | <b>No intramuscular GC</b> |
| Incident infections, n (%)                       | 934               | 4410                 | 552                   | 4792                     | 111                     | 5233                       |
| <b>Cumulative probability (95% CI) at 1 year</b> | 5.8 (5.1-6.4)     | 3.4 (3.3-3.6)        | 5.2 (4.4-5.9)         | 3.6 (3.4-3.8)            | 5.3 (3.7-6.8)           | 3.7 (3.5-3.9)              |
| <b>Current daily dose, mg</b>                    |                   |                      |                       |                          |                         |                            |
| nonuse (ref)                                     | 3.4 (2.6-4.3)     | 2.3 (2.1-2.6)        | 3.4 (2.4-4.4)         | 2.4 (2.1-2.6)            | 4.1 (1.8-6.3)           | 2.4 (2.2-2.7)              |
| >0-4.9                                           | 5.6 (4.2-7.0)     | 3.3 (2.8-3.7)        | 5.1 (3.3-6.9)         | 3.4 (3.0-3.9)            | 5.4 (1.9-8.7)           | 3.5 (3.1-4.0)              |
| 5.0-14.9                                         | 7.2 (6.0-8.5)     | 4.2 (3.8-4.6)        | 6.1 (4.6-7.6)         | 4.5 (4.1-4.9)            | 6.4 (3.4-9.3)           | 4.6 (4.2-5.0)              |
| 15.0-24.9                                        | 9.2 (6.0-12.4)    | 6.9 (5.7-8.0)        | 7.5 (3.8-11.1)        | 7.2 (6.1-8.3)            | 8.8 (0.1-16.6)          | 7.2 (6.1-8.3)              |
| ≥25.0                                            | 11.3 (6.7-15.7)   | 7.1 (5.2-8.9)        | 13.3 (5.9-20.0)       | 7.4 (5.6-9.1)            | 0.0 (0.0-0.0)           | 8.2 (6.4-9.9)              |
| <b>Cumulative dose in last year, mg</b>          |                   |                      |                       |                          |                         |                            |
| nonuse (ref)                                     | 0.9 (0.6-1.2)     | 0.8 (0.7-0.9)        | 1.1 (0.7-1.5)         | 0.8 (0.7-0.9)            | 1.2 (0.3-2.0)           | 0.8 (0.7-0.9)              |
| >0-959.9                                         | 18.5 (14.5-22.3)  | 13.0 (11.5-14.5)     | 18.2 (13.0-23.1)      | 13.5 (12.0-14.9)         | 14.6 (4.6-23.6)         | 13.9 (12.4-15.3)           |
| 960.0-3,054.9                                    | 24.8 (20.9-28.6)  | 17.3 (15.9-18.8)     | 21.0 (16.0-25.7)      | 18.2 (16.8-19.7)         | 16.3 (9.2-22.8)         | 18.6 (17.2-20.0)           |
| ≥3055.0                                          | 26.7 (19.8-33.0)  | 25.5 (22.1-28.7)     | 31.9 (21.2-41.1)      | 25.0 (21.9-28.1)         | 23.9 (7.8-37.1)         | 25.8 (22.8-28.8)           |
| <b>Total cumulative dose, mg</b>                 |                   |                      |                       |                          |                         |                            |
| nonuse (ref)                                     | 6.6 (4.4-8.7)     | 3.7 (3.2-4.2)        | 6.3 (3.9-8.6)         | 3.8 (3.3-4.3)            | 7.9 (2.1-13.3)          | 3.9 (3.4-4.4)              |
| >0-959.9                                         | 9.8 (7.5-11.9)    | 6.4 (5.6-7.1)        | 10.4 (7.4-13.3)       | 6.6 (5.8-7.3)            | 9.1 (2.8-15.0)          | 6.9 (6.1-7.6)              |
| 960.0-3,054.9                                    | 7.3 (6.0-8.5)     | 4.1 (3.7-4.5)        | 5.2 (3.9-6.6)         | 4.5 (4.1-4.9)            | 6.1 (3.4-8.7)           | 4.5 (4.1-4.9)              |



|                                                        |                  |                  |                  |                  |                  |                  |
|--------------------------------------------------------|------------------|------------------|------------------|------------------|------------------|------------------|
| 3,055.0-7,299.9                                        | 3.2 (2.4-4.0)    | 2.0 (1.7-2.2)    | 3.1 (2.1-4.1)    | 2.0 (1.8-2.3)    | 2.6 (0.7-4.4)    | 2.1 (1.9-2.4)    |
| ≥7,300.0                                               | 1.7 (0.0-3.4)    | 1.1 (0.6-1.7)    | 1.9 (0.0-4.4)    | 1.2 (0.6-1.7)    | 2.8 (0.0-8.0)    | 1.2 (0.6-1.7)    |
| <b>Cumulative probability (95% CI)<br/>at 5 years</b>  | 19.1 (17.8-20.3) | 12.2 (11.8-12.6) | 16.5 (15.0-18.0) | 12.8 (12.4-13.2) | 16.2 (13.0-19.2) | 13.0 (12.6-13.4) |
| <b>Current daily dose, mg</b>                          |                  |                  |                  |                  |                  |                  |
| nonuse (ref)                                           | 12.3 (10.8-13.7) | 8.4 (8.0-8.8)    | 11.4 (9.7-13.0)  | 8.6 ( 8.2- 9.0)  | 11.0 (7.5-14.4)  | 8.8 (8.4-9.2)    |
| >0-4.9                                                 | 25.7 (21.9-29.3) | 16.3 (15.0-17.5) | 21.2 (16.8-25.3) | 17.3 (16.1-18.5) | 21.9 (11.4-31.1) | 17.6 (16.3-18.8) |
| 5.0-14.9                                               | 25.1 (22.2-28.0) | 19.4 (18.2-20.6) | 24.4 (20.3-28.3) | 20.0 (18.8-21.1) | 26.3 (17.5-34.1) | 20.2 (19.1-21.3) |
| 15.0-24.9                                              | 29.5 (21.8-36.5) | 23.6 (20.5-26.6) | 24.7 (15.0-33.3) | 24.6 (21.6-27.6) | 15.6 (1.8-27.5)  | 24.8 (21.9-27.6) |
| ≥25.0                                                  | 35.3 (25.3-43.8) | 24.8 (19.9-29.4) | 35.5 (19.7-48.3) | 26.5 (21.9-30.9) | 10.0 (0.0-26.8)  | 27.6 (23.2-31.8) |
| <b>Cumulative dose in last year, mg</b>                |                  |                  |                  |                  |                  |                  |
| nonuse (ref)                                           | 6.9 (5.8-8.0)    | 5.8 (5.4-6.1)    | 7.3 (6.0-8.5)    | 5.8 (5.4-6.1)    | 7.4 (4.4-10.3)   | 5.9 (5.5-6.2)    |
| >0-959.9                                               | 32.3 (27.4-36.7) | 24.7 (22.6-26.7) | 34.5 (27.4-40.9) | 25.2 (23.3-27.1) | 24.4 (10.9-35.9) | 26.2 (24.2-28.0) |
| 960.0-3,054.9                                          | 41.6 (36.6-46.3) | 33.7 (31.6-35.7) | 35.5 (29.2-41.2) | 35.0 (33.0-36.9) | 29.2 (18.9-38.2) | 35.2 (33.2-37.1) |
| ≥3,055.0                                               | 53.3 (43.3-61.6) | 46.1 (40.7-51.1) | 56.1 (37.1-69.4) | 46.8 (41.9-51.3) | 34.3 (17.7-47.5) | 47.7 (42.9-52.0) |
| <b>Total cumulative dose, mg</b>                       |                  |                  |                  |                  |                  |                  |
| nonuse (ref)                                           | 25.6 (20.0-30.9) | 13.5 (12.3-14.7) | 20.0 (15.0-24.6) | 13.9 (12.7-15.1) | 22.4 (10.0-33.1) | 14.2 (13.0-15.4) |
| >0-959.9                                               | 24.0 (19.8-28.0) | 16.1 (14.7-17.5) | 22.9 (17.8-27.6) | 16.7 (15.3-18.0) | 29.7 (14.9-41.9) | 17.0 (15.7-18.3) |
| 960.0-3,054.9                                          | 22.6 (19.6-25.5) | 15.1 (14.1-16.0) | 20.1 (16.5-23.5) | 15.7 (14.7-16.7) | 18.5 (11.5-25.0) | 16.0 (15.1-16.9) |
| 3,055.0-7,299.9                                        | 21.5 (18.9-24.0) | 12.6 (11.8-13.4) | 17.3 (14.3-20.1) | 13.4 (12.6-14.2) | 15.5 (9.9-20.7)  | 13.7 (12.9-14.4) |
| ≥7,300.0                                               | 10.4 (8.6-12.2)  | 6.9 (6.3-7.5)    | 8.9 (6.7-11.0)   | 7.3 (6.6-7.9)    | 6.7 (2.3-11.0)   | 7.4 (6.8-8.0)    |
| <b>Cumulative probability (95% CI)<br/>at 10 years</b> | 30.6 (28.5-32.6) | 19.9 (19.3-20.5) | 28.1 (25.6-30.6) | 20.6 (20.0-21.2) | 23.7 (18.1-29.0) | 21.1 (20.5-21.7) |
| <b>Current daily dose, mg</b>                          |                  |                  |                  |                  |                  |                  |
| nonuse (ref)                                           | 23.1 (20.4-25.7) | 15.2 (14.5-15.8) | 22.2 (19.3-25.1) | 15.4 (14.7-16.1) | 18.6 (11.4-25.2) | 15.9 (15.2-16.5) |
| >0-4.9                                                 | 36.9 (31.1-42.2) | 26.3 (24.3-28.3) | 33.6 (26.5-40.1) | 27.3 (25.3-29.2) | 27.3 (10.7-40.8) | 27.8 (25.9-29.7) |
| 5.0-14.9                                               | 37.5 (32.7-42.0) | 29.7 (27.8-31.5) | 38.1 (30.6-44.9) | 30.3 (28.5-32.1) | 36.3 (22.7-47.6) | 30.8 (29.0-32.5) |
| 15.0-24.9                                              | 44.4 (30.0-55.8) | 36.8 (31.4-41.8) | 44.6 (22.3-60.5) | 37.6 (32.5-42.4) | 15.6 (1.8-27.5)  | 38.4 (33.4-43.0) |
| ≥25.0                                                  | 47.4 (32.4-59.1) | 36.5 (28.6-43.6) | 43.4 (21.4-59.2) | 38.7 (31.4-45.1) | 6.7 (0.0-18.5)   | 39.9 (32.9-46.1) |
| <b>Cumulative dose in last year, mg</b>                |                  |                  |                  |                  |                  |                  |
| nonuse (ref)                                           | 16.8 (14.4-19.0) | 12.7 (12.1-13.3) | 17.7 (15.0-20.3) | 12.7 (12.1-13.3) | 15.1 (8.2-21.4)  | 13.0 (12.4-13.6) |
| >0-959.9                                               | 43.1 (36.1-49.4) | 30.8 (27.9-33.6) | 43.0 (32.8-51.6) | 32.1 (29.3-34.8) | 31.8 (14.1-45.9) | 33.1 (30.4-35.7) |
| 960.0-3,054.9                                          | 47.0 (40.1-53.2) | 39.2 (36.3-42.0) | 51.0 (39.1-60.6) | 39.4 (36.7-42.1) | 31.4 (18.7-42.1) | 40.5 (37.8-43.1) |
| ≥3,055.0                                               | 62.7 (32.8-79.3) | 48.8 (41.7-55.0) | 51.5 (29.0-66.9) | 50.5 (43.2-56.8) | 29.9 (15.7-41.7) | 50.8 (43.9-56.8) |
| <b>Total cumulative dose, mg</b>                       |                  |                  |                  |                  |                  |                  |

|                                                   |                   |                      |                       |                          |                         |                            |
|---------------------------------------------------|-------------------|----------------------|-----------------------|--------------------------|-------------------------|----------------------------|
| nonuse (ref)                                      | 41.2 (31.0-49.8)  | 22.2 (20.3-24.1)     | 34.4 (25.4-42.3)      | 22.6 (20.7-24.5)         | 29.7 (11.4-44.2)        | 23.3 (21.4-25.2)           |
| >0-959.9                                          | 33.6 (27.0-39.6)  | 24.7 (22.5-26.8)     | 36.1 (26.4-44.6)      | 25.0 (22.9-27.0)         | 38.1 (16.1-54.3)        | 25.6 (23.6-27.6)           |
| 960.0-3,054.9                                     | 33.7 (28.9-38.1)  | 22.3 (20.9-23.7)     | 32.7 (26.4-38.5)      | 22.9 (21.5-24.3)         | 26.8 (13.7-38.0)        | 23.6 (22.2-25.0)           |
| 3,055.0-7,299.9                                   | 33.4 (29.2-37.3)  | 20.0 (18.8-21.1)     | 28.5 (23.9-32.8)      | 21.0 (19.8-22.1)         | 23.6 (12.1-33.6)        | 21.5 (20.4-22.7)           |
| ≥7,300.0                                          | 22.9 (19.6-26.2)  | 15.0 (14.0-16.1)     | 20.0 (15.9-23.9)      | 15.7 (14.7-16.7)         | 14.0 ( 5.2-22.0)        | 16.1 (15.1-17.1)           |
| <b>Parasitic infections</b>                       | <b>Inhaled GC</b> | <b>No Inhaled GC</b> | <b>Nasogastric GC</b> | <b>No nasogastric GC</b> | <b>Intramuscular GC</b> | <b>No intramuscular GC</b> |
| Incident infections, n (%)                        | 204               | 916                  | 93                    | 1027                     | 32                      | 1088                       |
| <b>Cumulative probability (95% CI) at 1 year</b>  | 1.6 (1.3-2.0)     | 0.8 (0.7-0.9)        | 0.9 (0.6-1.3)         | 0.9 (0.8-1.0)            | 1.4 (0.6-2.2)           | 0.9 (0.8-1.0)              |
| <b>Current daily dose, mg</b>                     |                   |                      |                       |                          |                         |                            |
| nonuse (ref)                                      | 0.9 (0.5-1.3)     | 0.6 (0.4-0.7)        | 0.4 (0.0-0.7)         | 0.6 (0.5-0.8)            | 1.0 (0.0-2.1)           | 0.6 (0.5-0.7)              |
| >0-4.9                                            | 1.1 (0.4-1.7)     | 0.8 (0.5-1.0)        | 1.2 (0.3-2.1)         | 0.8 (0.6-1.0)            | 2.5 (0.0-4.9)           | 0.8 (0.6-1.0)              |
| 5.0-14.9                                          | 2.4 (1.6-3.1)     | 0.9 (0.8-1.1)        | 1.0 (0.4-1.6)         | 1.2 (0.9-1.4)            | 0.7 (0.0-1.8)           | 1.1 (1.0-1.3)              |
| 15.0-24.9                                         | 3.5 (1.4-5.5)     | 1.7 (1.1-2.3)        | 1.6 (0.0-3.4)         | 2.0 (1.4-2.6)            | 4.1 (0.0-9.4)           | 1.9 (1.3-2.5)              |
| ≥25.0                                             | 2.6 (0.3-4.8)     | 1.9 (0.9-2.9)        | 4.6 (0.1-8.9)         | 1.8 (0.9-2.7)            | 0.0 (0.0-0.0)           | 2.1 (1.2-3.0)              |
| <b>Cumulative dose in last year, mg</b>           |                   |                      |                       |                          |                         |                            |
| nonuse (ref)                                      | 0.2 (0.1-0.4)     | 0.2 (0.1-0.2)        | 0.2 (0.0-0.3)         | 0.2 (0.1-0.2)            | 0.3 (0.0-0.8)           | 0.2 (0.1-0.2)              |
| >0-959.9                                          | 4.9 (2.6-7.2)     | 3.3 (2.5-4.2)        | 3.6 (0.9-6.3)         | 3.6 (2.7-4.4)            | 2.2 (0.0-6.4)           | 3.6 (2.8-4.4)              |
| 960.0-3,054.9                                     | 10.4 (7.3-13.5)   | 4.8 (3.9-5.7)        | 5.9 (2.7-9.1)         | 5.6 (4.7-6.5)            | 6.1 (1.1-10.8)          | 5.6 (4.7-6.5)              |
| ≥3055.0                                           | 9.0 (4.0-13.7)    | 7.6 (5.4-9.8)        | 7.3 (0.5-13.7)        | 8.0 ( 5.9-10.1)          | 6.2 (0.0-14.1)          | 8.0 (5.9-10.0)             |
| <b>Total cumulative dose, mg</b>                  |                   |                      |                       |                          |                         |                            |
| nonuse (ref)                                      | 1.7 (0.6-2.8)     | 1.0 (0.7-1.2)        | 1.0 (0.0-1.9)         | 1.0 (0.8-1.3)            | 2.2 (0.0-5.1)           | 1.0 (0.8-1.3)              |
| >0-959.9                                          | 2.3 (1.2-3.4)     | 1.5 (1.1-1.8)        | 1.7 (0.4-3.0)         | 1.6 (1.2-1.9)            | 1.2 (0.0-3.5)           | 1.6 (1.2-2.0)              |
| 960.0-3,054.9                                     | 2.3 (1.5-3.0)     | 1.0 (0.8-1.2)        | 1.2 (0.5-1.8)         | 1.1 (0.9-1.3)            | 2.0 (0.4-3.5)           | 1.1 (0.9-1.3)              |
| 3,055.0-7,299.9                                   | 1.0 (0.5-1.4)     | 0.4 (0.3-0.6)        | 0.5 (0.1-0.9)         | 0.5 (0.4-0.6)            | 0.3 (0.0-1.0)           | 0.5 (0.4-0.6)              |
| ≥7,300.0                                          | 0.8 (0.0-1.9)     | 0.4 (0.0-0.7)        | 0.0 (0.0-0.0)         | 0.5 (0.1-0.8)            | 2.8 (0.0-8.0)           | 0.4 (0.1-0.7)              |
| <b>Cumulative probability (95% CI) at 5 years</b> | 3.8 (3.2-4.4)     | 2.6 (2.4-2.8)        | 3.1 (2.4-3.7)         | 2.8 (2.6-2.9)            | 5.1 (3.2-6.9)           | 2.7 (2.5-2.9)              |
| <b>Current daily dose, mg</b>                     |                   |                      |                       |                          |                         |                            |
| nonuse (ref)                                      | 2.1 (1.5-2.7)     | 1.8 (1.6-2.0)        | 2.2 (1.4-3.0)         | 1.8 (1.6-2.0)            | 2.9 (1.0-4.7)           | 1.8 (1.6-2.0)              |
| >0-4.9                                            | 3.9 (2.2-5.5)     | 3.2 (2.6-3.8)        | 3.9 (1.8-6.0)         | 3.2 (2.7-3.8)            | 9.9 (2.9-16.5)          | 3.2 (2.6-3.7)              |
| 5.0-14.9                                          | 6.3 (4.6-7.9)     | 4.2 (3.6-4.8)        | 3.4 (1.7-5.0)         | 4.6 (4.0-5.2)            | 8.3 (1.9-14.2)          | 4.4 (3.9-5.0)              |
| 15.0-24.9                                         | 8.3 (4.2-12.3)    | 6.0 (4.3-7.7)        | 7.8 (1.5-13.7)        | 6.3 (4.6-7.9)            | 8.9 (0.0-18.4)          | 6.3 (4.7-7.9)              |
| ≥25.0                                             | 7.8 (2.9-12.5)    | 6.9 (3.9-9.8)        | 8.3 (1.6-14.5)        | 7.0 (4.2-9.6)            | 0.0 (0.0- 0.0)          | 7.3 (4.7-9.8)              |
| <b>Cumulative dose in last year, mg</b>           |                   |                      |                       |                          |                         |                            |

|                                                    |                  |                  |                 |                 |                 |                 |
|----------------------------------------------------|------------------|------------------|-----------------|-----------------|-----------------|-----------------|
| nonuse (ref)                                       | 1.0 (0.6- 1.4)   | 1.2 ( 1.0- 1.3)  | 1.5 (0.9- 2.1)  | 1.1 ( 1.0- 1.3) | 2.6 (0.9- 4.3)  | 1.1 ( 1.0- 1.3) |
| >0-959.9                                           | 5.6 (3.4- 7.7)   | 5.4 (4.4- 6.4)   | 5.6 (1.6- 9.5)  | 5.4 (4.5- 6.4)  | 2.0 (0.0- 4.9)  | 5.5 (4.6- 6.5)  |
| 960.0-3,054.9                                      | 10.3 (6.8-13.6)  | 9.0 (7.6-10.3)   | 8.0 (4.5-11.4)  | 9.3 (7.9-10.6)  | 12.4 (2.7-21.2) | 9.1 (7.8-10.4)  |
| ≥3,055.0                                           | 20.6 (11.1-29.1) | 10.9 (7.6-14.1)  | 14.3 (0.0-26.9) | 13.2 (9.7-16.6) | 19.1 (4.8-31.3) | 13.1 (9.6-16.4) |
| <b>Total cumulative dose, mg</b>                   |                  |                  |                 |                 |                 |                 |
| nonuse (ref)                                       | 4.7 (2.2-7.2)    | 3.2 (2.6-3.9)    | 5.6 (2.7-8.5)   | 3.2 (2.6-3.8)   | 6.2 (0.0-13.6)  | 3.3 (2.7-3.9)   |
| >0-959.9                                           | 6.7 (4.3-9.2)    | 3.4 (2.8-4.1)    | 4.3 (1.8-6.8)   | 3.8 (3.1-4.5)   | 10.9 (1.0-19.7) | 3.8 (3.1-4.4)   |
| 960.0-3,054.9                                      | 4.5 (3.2-5.8)    | 3.5 (3.0-3.9)    | 3.8 (2.2-5.5)   | 3.6 (3.1-4.1)   | 4.7 (1.3-8.0)   | 3.6 (3.1-4.0)   |
| 3,055.0-7,299.9                                    | 3.9 (2.8-5.1)    | 2.6 (2.2-3.0)    | 2.8 (1.6-4.1)   | 2.8 (2.4-3.1)   | 4.2 (1.4-6.9)   | 2.7 (2.4-3.1)   |
| ≥7,300.0                                           | 1.9 (1.1-2.7)    | 1.3 (1.1-1.6)    | 1.3 (0.5-2.2)   | 1.4 (1.1-1.7)   | 3.8 (0.4-7.1)   | 1.4 (1.1-1.6)   |
| <b>Cumulative probability (95% CI) at 10 years</b> |                  |                  |                 |                 |                 |                 |
|                                                    | 6.3 (5.2-7.3)    | 4.0 (3.7-4.3)    | 4.3 (3.3-5.3)   | 4.2 (3.9-4.5)   | 6.0 (3.7-8.1)   | 4.2 (3.9-4.5)   |
| <b>Current daily dose, mg</b>                      |                  |                  |                 |                 |                 |                 |
| nonuse (ref)                                       | 3.7 (2.7-4.7)    | 2.9 (2.6-3.2)    | 2.8 (1.8-3.8)   | 3.0 (2.7-3.3)   | 4.4 (1.7-7.0)   | 3.0 (2.7-3.3)   |
| >0-4.9                                             | 6.8 (3.8-9.7)    | 5.0 (4.1-6.0)    | 4.9 (2.4-7.4)   | 5.3 (4.4-6.3)   | 9.6 (2.9-15.8)  | 5.2 (4.3-6.1)   |
| 5.0-14.9                                           | 9.4 (6.5-12.1)   | 6.3 (5.3-7.3)    | 5.9 (2.1- 9.6)  | 6.9 (5.9-7.9)   | 7.6 (1.9-13.0)  | 6.8 (5.8-7.7)   |
| 15.0-24.9                                          | 18.9 (5.0-30.7)  | 7.9 (5.2-10.5)   | 18.2 (0.5-32.8) | 8.8 (6.0-11.5)  | 8.4 (0.0-17.3)  | 9.6 (6.6-12.5)  |
| ≥25.0                                              | 14.0 (0.7-25.6)  | 11.0 ( 6.2-15.4) | 10.5 (1.6-18.6) | 11.8 (6.7-16.6) | 0.0 (0.0- 0.0)  | 11.8 (7.2-16.2) |
| <b>Cumulative dose in last year, mg</b>            |                  |                  |                 |                 |                 |                 |
| nonuse (ref)                                       | 2.7 (1.7- 3.6)   | 2.3 (2.0-2.5)    | 2.3 (1.4-3.2)   | 2.3 (2.0-2.6)   | 3.9 (1.3-6.3)   | 2.3 (2.0-2.5)   |
| >0-959.9                                           | 9.4 (5.3-13.4)   | 6.1 (4.8-7.3)    | 5.2 (2.2-8.0)   | 6.8 (5.5-8.1)   | 4.7 (0.0-10.7)  | 6.7 (5.4-8.0)   |
| 960.0-3,054.9                                      | 11.6 (6.4-16.4)  | 10.2 (8.3-12.1)  | 12.3 (3.6-20.2) | 10.3 (8.4-12.0) | 8.1 (2.6-13.2)  | 10.4 (8.6-12.2) |
| ≥3,055.0                                           | 19.9 (1.1-35.1)  | 8.1 (6.0-10.2)   | 9.4 (1.6-16.6)  | 10.8 (6.3-15.0) | 15.6 (4.3-25.6) | 10.4 (6.3-14.4) |
| <b>Total cumulative dose, mg</b>                   |                  |                  |                 |                 |                 |                 |
| nonuse (ref)                                       | 10.2 (3.0-16.8)  | 4.9 (3.9-5.9)    | 9.4 (4.0-14.4)  | 4.9 (3.9-5.9)   | 6.7 (0.0-14.9)  | 5.2 (4.2-6.1)   |
| >0-959.9                                           | 8.7 (5.4-11.8)   | 5.4 (4.3-6.5)    | 4.5 (1.8-7.1)   | 5.9 (4.8-7.0)   | 10.9 (1.0-19.7) | 5.7 (4.6-6.7)   |
| 960.0-3,054.9                                      | 6.2 (4.3-8.1)    | 5.0 (4.3-5.7)    | 4.5 (2.5-6.4)   | 5.2 (4.5-6.0)   | 4.9 (1.3-8.3)   | 5.1 (4.4-5.8)   |
| 3,055.0-7,299.9                                    | 6.5 (4.3-8.6)    | 3.7 (3.2-4.2)    | 4.7 (2.4-7.0)   | 4.0 (3.5-4.5)   | 5.5 (1.7-9.1)   | 4.0 (3.5-4.5)   |
| ≥7,300.0                                           | 4.5 (3.0-6.0)    | 2.6 (2.2-3.1)    | 2.3 (1.0-3.7)   | 2.9 (2.5-3.4)   | 4.9 (0.8- 8.8)  | 2.9 (2.4-3.3)   |
| <b>Fungal infections</b>                           |                  |                  |                 |                 |                 |                 |
| Incident infections, n (%)                         | 985              | 4431             | 599             | 4817            | 114             | 5302            |
| <b>Cumulative probability (95% CI) at 1 year</b>   |                  |                  |                 |                 |                 |                 |
|                                                    | 6.6 (5.9-7.3)    | 3.5 (3.3-3.7)    | 5.5 (4.7-6.3)   | 3.8 (3.6-4.0)   | 4.7 (3.3-6.2)   | 3.9 (3.7-4.1)   |
| <b>Current daily dose, mg</b>                      |                  |                  |                 |                 |                 |                 |
| nonuse (ref)                                       | 3.7 (2.8-4.6)    | 2.3 (2.0- 2.5)   | 3.1 (2.2- 4.1)  | 2.4 (2.12.6)    | 3.3 (1.3-5.4)   | 2.4 (2.2-2.7)   |

|                                                       |                  |                  |                  |                  |                  |                  |
|-------------------------------------------------------|------------------|------------------|------------------|------------------|------------------|------------------|
| >0-4.9                                                | 7.5 (5.9-9.1)    | 3.5 (3.0-3.9)    | 7.7 (5.5-9.8)    | 3.7 (3.3-4.2)    | 3.0 (0.4-5.6)    | 4.1 (3.6-4.5)    |
| 5.0-14.9                                              | 8.0 (6.7-9.3)    | 4.2 (3.8-4.6)    | 6.8 (5.2-8.4)    | 4.5 (4.1-4.9)    | 6.5 (3.4-9.4)    | 4.7 (4.3-5.1)    |
| 15.0-24.9                                             | 11.9 (8.3-15.4)  | 6.6 (5.4-7.7)    | 7.2 (3.5-10.8)   | 7.4 (6.2-8.5)    | 12.0 (2.4-20.6)  | 7.2 (6.1-8.3)    |
| ≥25.0                                                 | 8.6 (4.5-12.6)   | 8.5 (6.5-10.5)   | 7.2 (1.4-12.6)   | 8.6 (6.7-10.5)   | 0.0 (0.0-0.0)    | 8.7 (6.9-10.6)   |
| <b>Cumulative dose in last year, mg</b>               |                  |                  |                  |                  |                  |                  |
| nonuse (ref)                                          | 0.9 (0.6-1.2)    | 0.8 (0.7-1.0)    | 1.1 (0.7-1.5)    | 0.8 (0.7-0.9)    | 1.1 (0.3-2.0)    | 0.8 (0.7-0.9)    |
| >0-959.9                                              | 20.8 (16.7-24.6) | 11.3 ( 9.9-12.6) | 17.3 (12.2-22.0) | 12.5 (11.1-13.9) | 13.8 ( 3.5-22.9) | 12.9 (11.5-14.3) |
| 960.0-3,054.9                                         | 28.6 (24.6-32.5) | 18.7 (17.3-20.2) | 24.4 (19.3-29.1) | 19.9 (18.4-21.3) | 19.2 (11.0-26.5) | 20.3 (18.9-21.8) |
| ≥3,055.0                                              | 28.2 (21.2-34.7) | 23.3 (19.9-26.5) | 32.0 (20.8-41.6) | 23.5 (20.3-26.5) | 13.7 ( 0.1-25.4) | 24.7 (21.6-27.7) |
| <b>Total cumulative dose, mg</b>                      |                  |                  |                  |                  |                  |                  |
| nonuse (ref)                                          | 6.4 ( 4.3- 8.5)  | 4.1 (3.6-4.7)    | 6.2 (3.9-8.5)    | 4.2 (3.7-4.7)    | 7.4 (1.9-12.5)   | 4.3 (3.8-4.8)    |
| >0-959.9                                              | 11.8 ( 9.4-14.2) | 5.6 (4.9-6.4)    | 10.4 (7.4-13.4)  | 6.2 (5.5-7.0)    | 8.0 (2.1-13.6)   | 6.6 (5.9-7.3)    |
| 960.0-3,054.9                                         | 9.0 ( 7.6-10.3)  | 4.6 (4.2-5.0)    | 6.3 (4.9- 7.8)   | 5.1 (4.7-5.5)    | 6.2 (3.4-8.8)    | 5.2 (4.8-5.6)    |
| 3,055.0-7,299.9                                       | 3.2 ( 2.4- 4.0)  | 1.6 (1.4-1.8)    | 3.1 (2.1- 4.1)   | 1.7 (1.5-1.9)    | 1.8 (0.2-3.4)    | 1.8 (1.6-2.1)    |
| ≥7,300.0                                              | 0.9 ( 0.0- 2.1)  | 1.5 (0.9-2.2)    | 1.0 (0.0-2.8)    | 1.5 (0.8-2.1)    | 0.0 (0.0-0.0)    | 1.5 (0.8-2.1)    |
| <b>Cumulative probability (95% CI)<br/>at 5 years</b> |                  |                  |                  |                  |                  |                  |
|                                                       | 20.8 (19.5-22.1) | 12.7 (12.3-13.1) | 20.1 (18.5-21.7) | 13.1 (12.7-13.5) | 18.3 (14.9-21.7) | 13.6 (13.2-14.0) |
| <b>Current daily dose, mg</b>                         |                  |                  |                  |                  |                  |                  |
| nonuse (ref)                                          | 12.9 (11.4-14.4) | 9.0 (8.5-9.4)    | 14.0 (12.1-15.8) | 9.0 (8.5-9.4)    | 12.8 (9.0-16.4)  | 9.3 (8.9-9.7)    |
| >0-4.9                                                | 30.0 (26.0-33.8) | 16.6 (15.4-17.9) | 27.4 (22.6-31.9) | 17.7 (16.4-18.9) | 31.6 (18.8-42.5) | 18.3 (17.1-19.5) |
| 5.0-14.9                                              | 27.3 (24.2-30.2) | 19.2 (18.0-20.3) | 28.9 (24.6-32.9) | 19.6 (18.5-20.8) | 21.7 (13.0-29.5) | 20.4 (19.3-21.5) |
| 15.0-24.9                                             | 36.9 (28.7-44.2) | 25.6 (22.3-28.7) | 35.9 (23.9-46.0) | 26.9 (23.7-30.0) | 46.3 (0.0-71.5)  | 27.5 (24.4-30.4) |
| ≥25.0 g                                               | 32.2 (22.2-40.8) | 24.9 (20.4-29.0) | 20.9 ( 8.6-31.5) | 27.2 (22.9-31.3) | 25.0 (0.0-57.4)  | 26.8 (22.7-30.7) |
| <b>Cumulative dose in last year, mg</b>               |                  |                  |                  |                  |                  |                  |
| nonuse (ref)                                          | 7.5 (6.3-8.6)    | 6.1 (5.8-6.5)    | 9.6 (8.1-11.1)   | 6.0 (5.6-6.3)    | 9.7 (6.4-12.9)   | 6.2 (5.9-6.5)    |
| >0-959.9                                              | 36.1 (31.0-40.8) | 24.6 (22.6-26.6) | 38.5 (31.0-45.2) | 25.5 (23.6-27.4) | 21.9 ( 8.2-33.6) | 26.9 (25.0-28.7) |
| 960.0-3,054.9 mg                                      | 47.1 (41.7-52.0) | 34.9 (32.8-36.9) | 44.0 (37.3-50.0) | 36.2 (34.1-38.1) | 40.2 (25.1-52.2) | 36.8 (34.8-38.7) |
| ≥3,055.0 mg                                           | 52.8 (42.9-61.0) | 42.7 (37.4-47.5) | 57.9 (40.5-70.1) | 43.7 (38.9-48.1) | 60.0 ( 5.2-83.1) | 44.9 (40.3-49.2) |
| <b>Total cumulative dose, mg</b>                      |                  |                  |                  |                  |                  |                  |
| nonuse (ref)                                          | 24.9 (19.2-30.2) | 14.9 (13.6-16.1) | 24.1 (18.4-29.3) | 14.9 (13.7-16.2) | 30.8 (16.0-43.1) | 15.4 (14.1-16.6) |
| >0-959.9                                              | 26.0 (21.9-29.9) | 15.8 (14.4-17.2) | 24.4 (19.2-29.2) | 16.6 (15.2-17.9) | 30.2 (15.0-42.7) | 17.1 (15.8-18.4) |
| 960.0-3,054.9                                         | 26.7 (23.7-29.7) | 16.7 (15.7-17.7) | 25.9 (21.8-29.7) | 17.3 (16.4-18.3) | 16.1 (10.1-21.8) | 18.1 (17.1-19.0) |
| 3,055.0-7,299.9                                       | 21.1 (18.5-23.6) | 12.8 (12.0-13.5) | 21.5 (18.2-24.5) | 13.1 (12.4-13.9) | 16.5 (10.6-22.0) | 13.7 (13.0-14.5) |
| ≥7,300.0                                              | 12.2 (10.2-14.2) | 6.7 (6.1-7.3)    | 10.9 (8.4-13.3)  | 7.1 (6.5-7.7)    | 12.8 (6.0-19.1)  | 7.4 (6.8-8.0)    |

|                                                        |                  |                  |                  |                  |                  |                  |
|--------------------------------------------------------|------------------|------------------|------------------|------------------|------------------|------------------|
| <b>Cumulative probability (95% CI)<br/>at 10 years</b> | 29.9 (27.9-31.8) | 20.0 (19.4-20.6) | 28.8 (26.5-31.1) | 20.6 (20.0-21.2) | 24.1 (18.3-29.4) | 21.2 (20.6-21.8) |
| <b>Current daily dose, mg</b>                          |                  |                  |                  |                  |                  |                  |
| nonuse (ref)                                           | 21.0 (18.6-23.3) | 15.7 (15.0-16.4) | 22.6 (19.7-25.4) | 15.7 (15.0-16.4) | 19.4 (12.1-26.0) | 16.2 (15.5-16.8) |
| >0-4.9                                                 | 39.8 (34.1-45.0) | 26.6 (24.5-28.6) | 37.4 (30.5-43.6) | 27.6 (25.6-29.6) | 46.5 (19.2-64.6) | 28.3 (26.4-30.2) |
| 5.0-14.9                                               | 39.0 (34.3-43.5) | 27.6 (25.8-29.4) | 36.8 (30.5-42.6) | 28.7 (27.0-30.4) | 20.6 (12.5-28.0) | 29.5 (27.8-31.2) |
| 15.0-24.9                                              | 44.8 (33.6-54.1) | 34.0 (29.4-38.4) | 41.6 (26.8-53.4) | 35.5 (31.0-39.7) | 38.2 ( 4.7-59.9) | 36.0 (31.7-40.0) |
| ≥25.0                                                  | 38.4 (25.7-49.0) | 36.3 (29.0-42.9) | 45.4 ( 8.4-67.4) | 36.3 (29.9-42.1) | 12.5 ( 0.0-32.7) | 37.3 (31.0-43.1) |
| <b>Cumulative dose in last year, mg</b>                |                  |                  |                  |                  |                  |                  |
| nonuse (ref)                                           | 15.8 (13.7-17.9) | 13.1 (12.4-13.7) | 18.6 (16.0-21.1) | 12.9 (12.3-13.5) | 16.8 (9.9-23.1)  | 13.3 (12.7-13.9) |
| >0-959.9                                               | 39.6 (33.4-45.2) | 31.4 (28.5-34.1) | 42.1 (32.0-50.7) | 32.1 (29.4-34.7) | 21.8 (10.2-31.9) | 33.1 (30.5-35.6) |
| 960.0-3,054.9                                          | 47.5 (40.9-53.3) | 35.9 (33.4-38.4) | 46.5 (37.5-54.2) | 36.9 (34.5-39.3) | 40.7 (13.4-59.4) | 37.8 (35.4-40.0) |
| ≥3,055.0                                               | 49.6 (38.0-59.0) | 46.0 (38.5-52.5) | 53.4 (25.6-70.8) | 46.4 (39.7-52.5) | 44.1 (17.1-62.3) | 47.0 (40.5-52.7) |
| <b>Total cumulative dose, mg</b>                       |                  |                  |                  |                  |                  |                  |
| nonuse (ref)                                           | 33.0 (25.3-39.8) | 22.5 (20.6-24.3) | 34.2 (25.1-42.1) | 22.4 (20.6-24.3) | 32.3 (16.6-45.0) | 23.1 (21.2-24.9) |
| >0-959.9                                               | 35.3 (29.1-41.0) | 24.7 (22.6-26.8) | 28.5 (22.5-34.0) | 25.9 (23.8-27.9) | 43.5 (20.2-60.0) | 25.9 (23.9-27.9) |
| 960.0-3,054.9                                          | 36.3 (31.7-40.5) | 24.5 (23.0-26.0) | 38.2 (31.9-43.9) | 25.0 (23.5-26.4) | 20.8 (10.4-30.1) | 26.1 (24.6-27.5) |
| 3,055.0-7,299.9                                        | 30.9 (27.0-34.5) | 20.3 (19.1-21.5) | 33.8 (28.5-38.8) | 20.5 (19.4-21.7) | 17.7 (11.4-23.6) | 21.6 (20.4-22.7) |
| ≥7,300.0                                               | 21.7 (18.6-24.7) | 13.7 (12.7-14.7) | 17.4 (13.9-20.7) | 14.6 (13.6-15.5) | 23.5 ( 8.9-35.9) | 14.7 (13.8-15.7) |

Note: CI, confidence interval; GC, glucocorticoids; IQR, interquartile range. Estimates are shown for time-variant prednisolone-equivalent dosage.

**Supplemental Table 12. Kaplan-Meier estimates of infections per level of current daily and cumulative oral glucocorticoid prednisolone-equivalent dose by use of rectal and topical glucocorticoids at baseline**

| All-cause infection                               | Non-oral GC use  |                  |                  |                  |
|---------------------------------------------------|------------------|------------------|------------------|------------------|
|                                                   | Rectal GC        | No rectal GC     | Topical GC       | No topical GC    |
| Incident infections, n (%)                        | 572              | 21662            | 751              | 21483            |
| <b>Cumulative probability (95% CI) at 1 year</b>  | 23.8 (21.0-26.6) | 18.2 (17.8-18.6) | 24.7 (22.1-27.3) | 18.1 (17.7-18.5) |
| <b>Current daily dose, mg</b>                     |                  |                  |                  |                  |
| nonuse (ref)                                      | 16.0 (12.1-19.8) | 12.8 (12.3-13.4) | 16.9 (13.3-20.5) | 12.8 (12.2-13.3) |
| >0-4.9                                            | 21.7 (15.2-27.7) | 17.9 (17.0-18.7) | 24.0 (18.1-29.5) | 17.8 (16.9-18.7) |
| 5.0-14.9                                          | 29.6 (24.0-34.8) | 20.9 (20.2-21.6) | 31.2 (26.0-36.0) | 20.8 (20.1-21.5) |
| 15.0-24.9                                         | 35.7 (23.1-46.2) | 30.2 (28.3-32.1) | 34.0 (22.8-43.5) | 30.2 (28.3-32.1) |
| ≥25.0                                             | 41.2 (24.0-54.6) | 35.6 (32.6-38.5) | 38.4 (21.0-52.0) | 35.7 (32.7-38.6) |
| <b>Cumulative dose in last year, mg</b>           |                  |                  |                  |                  |
| nonuse (ref)                                      | 7.3 (5.1-9.4)    | 5.0 (4.7-5.3)    | 6.4 (4.6-8.2)    | 5.0 (4.8-5.3)    |
| >0-959.9                                          | 48.0 (37.5-56.7) | 38.7 (37.1-40.2) | 55.6 (46.8-63.0) | 38.3 (36.7-39.8) |
| 960.0-3,054.9                                     | 47.9 (39.8-54.8) | 49.2 (47.9-50.5) | 60.9 (52.8-67.7) | 48.8 (47.5-50.1) |
| ≥3,055.0                                          | 72.3 (55.8-82.7) | 59.9 (57.5-62.1) | 65.3 (49.4-76.2) | 60.0 (57.7-62.3) |
| <b>Total cumulative dose, mg</b>                  |                  |                  |                  |                  |
| nonuse (ref)                                      | 26.8 (19.0-33.9) | 20.4 (19.4-21.5) | 25.0 (17.8-31.5) | 20.5 (19.4-21.5) |
| >0-959.9                                          | 37.1 (28.5-44.6) | 28.8 (27.5-30.1) | 44.9 (36.9-51.8) | 28.5 (27.2-29.7) |
| 960.0-3,054.9                                     | 25.9 (21.1-30.5) | 21.8 (21.1-22.5) | 27.5 (22.9-31.8) | 21.7 (21.0-22.5) |
| 3,055.0-7,299.9                                   | 12.8 (8.7-16.7)  | 10.2 (9.6-10.7)  | 12.0 (8.5-15.4)  | 10.2 (9.6-10.7)  |
| ≥7,300.0                                          | 21.9 (4.7-35.9)  | 7.1 (5.7-8.5)    | 13.0 (0.0-25.8)  | 7.3 (5.9-8.8)    |
| <b>Cumulative probability (95% CI) at 5 years</b> | 64.4 (60.5-67.8) | 54.4 (53.9-55.0) | 63.7 (60.4-66.7) | 54.4 (53.8-55.0) |
| <b>Current daily dose, mg</b>                     |                  |                  |                  |                  |
| nonuse (ref)                                      | 50.5 (44.9-55.4) | 41.9 (41.1-42.7) | 50.6 (45.9-54.9) | 41.8 (41.0-42.6) |
| >0-4.9                                            | 81.7 (72.5-87.9) | 64.6 (63.1-66.0) | 75.4 (67.3-81.5) | 64.6 (63.2-66.0) |
| 5.0-14.9                                          | 76.6 (68.6-82.6) | 69.7 (68.5-70.8) | 78.9 (72.5-83.8) | 69.6 (68.4-70.7) |
| 15.0-24.9                                         | 81.4 (57.7-91.8) | 77.8 (75.3-80.0) | 74.2 (58.4-84.0) | 78.1 (75.5-80.3) |
| ≥25.0                                             | 86.2 (66.2-94.4) | 81.4 (78.0-84.2) | 88.6 (67.3-96.0) | 81.3 (78.0-84.1) |
| <b>Cumulative dose in last year, mg</b>           |                  |                  |                  |                  |
| nonuse (ref)                                      | 41.4 (35.9-46.4) | 32.4 (31.6-33.1) | 38.9 (34.2-43.3) | 32.4 (31.6-33.1) |
| >0-959.9                                          | 85.6 (73.0-92.4) | 74.6 (73.1-76.1) | 82.7 (75.7-87.7) | 74.5 (73.0-76.0) |
| 960.0-3,054.9                                     | 92.2 (85.4-95.8) | 84.3 (83.2-85.3) | 89.7 (84.1-93.4) | 84.3 (83.2-85.3) |
| ≥3,055.0                                          | 96.7 (79.4-99.5) | 92.5 (90.8-93.8) | 94.1 (81.3-98.1) | 92.6 (90.9-94.0) |

|                                                    |                    |                     |                    |                      |
|----------------------------------------------------|--------------------|---------------------|--------------------|----------------------|
| <b>Total cumulative dose, mg</b>                   |                    |                     |                    |                      |
| nonuse (ref)                                       | 77.6 (66.2-85.2)   | 58.2 (56.6-59.8)    | 74.2 (64.2-81.4)   | 58.3 (56.6-59.8)     |
| >0-959.9                                           | 66.1 (55.4-74.3)   | 62.3 (60.7-63.9)    | 76.5 (68.3-82.5)   | 61.8 (60.2-63.4)     |
| 960.0-3,054.9                                      | 68.4 (60.7-74.6)   | 61.5 (60.4-62.6)    | 68.2 (61.9-73.5)   | 61.5 (60.3-62.6)     |
| 3,055.0-7,299.9                                    | 61.6 (54.2-67.8)   | 55.0 (53.9-56.1)    | 60.4 (54.1-65.9)   | 55.0 (53.9-56.1)     |
| ≥7,300.0                                           | 46.7 (36.5-55.2)   | 35.8 (34.6-37.1)    | 41.1 (32.6-48.6)   | 35.9 (34.6-37.2)     |
| <b>Cumulative probability (95% CI) at 10 years</b> | 80.3 (76.3-83.6)   | 76.8 (76.2-77.4)    | 82.6 (79.1-85.5)   | 76.7 (76.1-77.3)     |
| <b>Current daily dose, mg</b>                      |                    |                     |                    |                      |
| nonuse (ref)                                       | 69.2 ( 62.8- 74.4) | 68.0 (67.0-68.9)    | 74.3 (68.7-78.9)   | 67.8 (66.8-68.7)     |
| >0-4.9                                             | 93.9 ( 85.1- 97.5) | 84.1 (82.6-85.5)    | 89.3 (81.3-93.9)   | 84.2 (82.7-85.6)     |
| 5.0-14.9                                           | 91.0 ( 83.2- 95.2) | 88.6 (87.5-89.7)    | 92.6 (85.1-96.3)   | 88.6 (87.4-89.6)     |
| 15.0-24.9                                          | 85.0 ( 57.9- 94.7) | 92.3 (89.9-94.2)    | 100.0 (NA-NA)      | 92.1 (89.6-94.0)     |
| ≥25.0                                              | 100.0 ( NA- NA)    | 92.8 (89.8-95.0)    | 92.0 (70.2-97.9)   | 92.9 (89.9-95.1)     |
| <b>Cumulative dose in last year, mg</b>            |                    |                     |                    |                      |
| nonuse (ref)                                       | 65.1 (58.3-70.7)   | 62.5 (61.5-63.5)    | 69.2 ( 62.8-74.4)  | 62.3 (61.3-63.3)     |
| >0-959.9                                           | 89.1 (78.0-94.6)   | 88.7 (87.1-90.1)    | 92.2 ( 83.4-96.4)  | 88.5 (86.9-90.0)     |
| 960.0-3,054.9                                      | 98.6 (90.9-99.8)   | 92.9 (91.9-93.9)    | 93.7 ( 88.0- 96.7) | 93.1 (92.0-94.0)     |
| ≥3,055.0                                           | 90.4 (76.7-96.0)   | 97.2 (95.7-98.2)    | 100.0 (NA-NA)      | 97.2 (95.6-98.2)     |
| <b>Total cumulative dose, mg</b>                   |                    |                     |                    |                      |
| nonuse (ref)                                       | 84.9 (73.4-91.4)   | 79.1 (77.4-80.8)    | 88.1 (76.6-94.0)   | 79.0 (77.2-80.7)     |
| >0-959.9                                           | 88.8 (74.2-95.2)   | 82.0 (80.3-83.6)    | 85.3 (76.6-90.7)   | 82.1 (80.3-83.7)     |
| 960.0-3,054.9                                      | 84.1 (75.5-89.7)   | 81.2 (79.9-82.4)    | 85.0 (77.9-89.8)   | 81.2 (79.9-82.4)     |
| 3,055.0-7,299.9                                    | 77.8 (69.1-84.0)   | 76.0 (74.8-77.2)    | 81.6 (73.1-87.4)   | 75.9 (74.7-77.1)     |
| ≥7,300.0                                           | 67.8 (56.5-76.1)   | 67.4 (65.9-68.9)    | 74.2 (64.2-81.3)   | 67.2 (65.7-68.7)     |
| <b>Bacterial infections</b>                        | <b>Rectal GC</b>   | <b>No rectal GC</b> | <b>Topical GC</b>  | <b>No topical GC</b> |
| Incident infections, n (%)                         | 126                | 5108                | 173                | 5061                 |
| <b>Cumulative probability (95% CI) at 1 year</b>   | 3.3 (2.1-4.5)      | 3.2 (3.0-3.3)       | 4.5 (3.2-5.7)      | 3.1 (2.9-3.3)        |
| <b>Current daily dose, mg</b>                      |                    |                     |                    |                      |
| nonuse (ref)                                       | 2.6 (1.0-4.1)      | 2.1 (1.8-2.3)       | 2.9 (1.3-4.4)      | 2.0 (1.8-2.3)        |
| >0-4.9                                             | 5.5 (1.9-8.9)      | 3.4 (3.0-3.8)       | 4.4 (1.5-7.1)      | 3.4 (3.0-3.8)        |
| 5.0-14.9                                           | 2.5 (0.5-4.4)      | 3.5 (3.1-3.8)       | 5.8 (3.2-8.4)      | 3.4 (3.1-3.7)        |
| 15.0-24.9                                          | 5.2 (0.0-10.7)     | 6.4 (5.3-7.4)       | 6.5 (0.8-11.8)     | 6.3 (5.3-7.4)        |
| ≥25.0                                              | 3.0 (0.0-8.7)      | 8.1 (6.3-9.9)       | 9.8 (0.0-19.8)     | 7.9 (6.1-9.6)        |
| <b>Cumulative dose in last year, mg</b>            |                    |                     |                    |                      |
| nonuse (ref)                                       | 0.8 (0.2-1.5)      | 0.7 (0.6-0.8)       | 0.9 (0.3-1.5)      | 0.7 (0.6-0.8)        |

|                                                    |                  |                  |                  |                  |
|----------------------------------------------------|------------------|------------------|------------------|------------------|
| >0-959.9                                           | 11.2 (2.2-19.4)  | 11.4 (10.0-12.7) | 28.2 (15.0-39.3) | 10.9 (9.6-12.3)  |
| 960.0-3,054.9                                      | 9.3 (2.9-15.3)   | 17.3 (15.9-18.7) | 21.1 (10.4-30.4) | 17.0 (15.7-18.4) |
| ≥3,055.0 mg                                        | 54.4 (20.1-74.0) | 22.5 (19.4-25.5) | 50.9 (20.2-69.8) | 22.6 (19.5-25.6) |
| <b>Total cumulative dose, mg</b>                   |                  |                  |                  |                  |
| nonuse (ref)                                       | 4.6 (0.9-8.2)    | 3.5 (3.0-4.0)    | 4.7 (1.2-8.1)    | 3.5 (3.0-4.0)    |
| >0-959.9                                           | 4.3 (0.5-8.0)    | 5.4 (4.7-6.0)    | 11.1 (5.8-16.1)  | 5.2 (4.5-5.8)    |
| 960.0-3,054.9                                      | 2.6 (0.8-4.3)    | 4.1 (3.7-4.4)    | 4.1 (2.1-6.2)    | 4.0 (3.7-4.4)    |
| 3,055.0-7,299.9                                    | 3.0 (1.0-4.9)    | 1.7 (1.5-1.9)    | 2.3 (0.8-3.8)    | 1.7 (1.5-2.0)    |
| ≥7,300.0                                           | 3.0 (0.0-8.7)    | 0.6 (0.2-1.0)    | 4.0 (0.0-11.4)   | 0.6 (0.2-1.0)    |
| <b>Cumulative probability (95% CI) at 5 years</b>  | 12.1 ( 9.6-14.6) | 11.6 (11.2-12.0) | 13.3 (11.1-15.6) | 11.5 (11.2-11.9) |
| <b>Current daily dose, mg</b>                      |                  |                  |                  |                  |
| nonuse (ref)                                       | 8.6 (5.8-11.2)   | 7.5 (7.1-7.9)    | 8.8 (6.4-11.2)   | 7.5 (7.1-7.9)    |
| >0-4.9                                             | 26.5 (17.0-34.9) | 16.7 (15.6-17.9) | 21.6 (14.2-28.3) | 16.8 (15.6-17.9) |
| 5.0-14.9                                           | 11.4 (5.2-17.2)  | 17.8 (16.7-18.8) | 18.9 (12.6-24.7) | 17.6 (16.5-18.6) |
| 15.0-24.9                                          | 23.0 (0.8-40.3)  | 23.7 (20.8-26.5) | 22.9 (6.5-36.4)  | 23.7 (20.8-26.6) |
| ≥25.0                                              | 15.5 (0.0-30.5)  | 28.8 (24.3-33.0) | 13.9 (0.0-27.4)  | 28.9 (24.4-33.1) |
| <b>Cumulative dose in last year, mg</b>            |                  |                  |                  |                  |
| nonuse (ref)                                       | 5.5 (3.4-7.5)    | 4.9 (4.6-5.2)    | 5.9 (4.1-7.7)    | 4.9 (4.6-5.2)    |
| >0-959.9                                           | 22.2 (8.9-33.5)  | 24.1 (22.2-25.9) | 26.3 (17.0-34.5) | 24.0 (22.1-25.9) |
| 960.0-3,054.9                                      | 39.1 (21.1-53.0) | 33.0 (31.1-34.9) | 38.0 (24.8-48.9) | 33.0 (31.0-34.8) |
| ≥3,055.0                                           | 54.8 (12.9-76.6) | 50.2 (45.3-54.6) | 55.8 (29.7-72.2) | 50.2 (45.3-54.7) |
| <b>Total cumulative dose, mg</b>                   |                  |                  |                  |                  |
| nonuse (ref)                                       | 14.2 (5.6-22.0)  | 12.3 (11.2-13.4) | 17.3 (9.1-24.9)  | 12.2 (11.1-13.3) |
| >0-959.9                                           | 10.2 (3.5-16.5)  | 14.3 (13.1-15.6) | 20.5 (12.3-27.8) | 14.0 (12.8-15.2) |
| 960.0-3,054.9                                      | 15.1 (8.9-20.8)  | 14.5 (13.6-15.4) | 14.4 (9.3-19.2)  | 14.5 (13.6-15.4) |
| 3,055.0-7,299.9                                    | 14.8 (9.9-19.6)  | 11.8 (11.1-12.5) | 13.3 (9.0-17.4)  | 11.8 (11.1-12.5) |
| ≥7,300.0                                           | 5.9 (2.3- 9.5)   | 7.3 (6.7-7.8)    | 7.6 (4.2-11.0)   | 7.2 (6.6-7.8)    |
| <b>Cumulative probability (95% CI) at 10 years</b> | 20.8 (16.8-24.7) | 21.0 (20.4-21.7) | 21.8 (18.3-25.1) | 21.0 (20.4-21.6) |
| <b>Current daily dose, mg</b>                      |                  |                  |                  |                  |
| nonuse (ref)                                       | 17.5 (12.7-22.0) | 15.6 (14.9-16.3) | 15.2 (11.4-18.9) | 15.7 (15.0-16.3) |
| >0-4.9                                             | 31.5 (20.6-40.9) | 29.1 (27.1-31.1) | 40.4 (27.5-51.0) | 28.8 (26.8-30.7) |
| 5.0-14.9                                           | 19.0 ( 8.2-28.6) | 30.9 (29.1-32.7) | 27.9 (18.2-36.4) | 30.7 (28.9-32.5) |
| 15.0-24.9                                          | 26.0 (0.2-45.2)  | 36.0 (31.3-40.4) | 38.4 (11.1-57.2) | 35.7 (30.9-40.1) |
| ≥25.0                                              | 62.4 (0.0-90.9)  | 45.0 (37.4-51.6) | 17.1 (0.0-33.0)  | 45.8 (38.2-52.5) |
| <b>Cumulative dose in last year, mg</b>            |                  |                  |                  |                  |



|                                                   |                  |                     |                   |                      |
|---------------------------------------------------|------------------|---------------------|-------------------|----------------------|
| nonuse (ref)                                      | 14.1 (9.8-18.1)  | 12.7 (12.1-13.3)    | 13.7 (10.0-17.1)  | 12.7 (12.1-13.3)     |
| >0-959.9                                          | 28.2 (12.4-41.2) | 33.2 (30.5-35.9)    | 29.0 (18.0-38.5)  | 33.1 (30.3-35.7)     |
| 960.0-3,054.9                                     | 32.6 (17.0-45.2) | 42.0 (39.2-44.6)    | 34.6 (22.4-44.9)  | 42.0 (39.2-44.7)     |
| ≥3,055.0                                          | 67.8 (0.0-92.1)  | 53.6 (47.9-58.6)    | 64.8 (13.3-85.7)  | 54.1 (48.0-59.4)     |
| <b>Total cumulative dose, mg</b>                  |                  |                     |                   |                      |
| nonuse                                            | 18.6 (7.6-28.3)  | 22.4 (20.3-24.3)    | 21.9 (11.6-31.1)  | 22.3 (20.3-24.3)     |
| >0-959.9                                          | 30.0 (12.8-43.7) | 22.4 (20.5-24.2)    | 27.5 (16.3-37.2)  | 22.4 (20.5-24.3)     |
| 960.0-3,054.9                                     | 22.6 (13.9-30.3) | 24.2 (22.8-25.7)    | 20.3 (13.4-26.7)  | 24.3 (22.8-25.8)     |
| 3,055.0-7,299.9                                   | 22.1 (14.3-29.3) | 20.9 (19.8-22.1)    | 25.4 (16.9-33.0)  | 20.9 (19.7-22.0)     |
| ≥7,300.0                                          | 14.3 (7.8-20.4)  | 17.4 (16.4-18.5)    | 17.2 (11.4-22.6)  | 17.4 (16.3-18.4)     |
| <b>Viral infections</b>                           | <b>Rectal GC</b> | <b>No rectal GC</b> | <b>Topical GC</b> | <b>No topical GC</b> |
| Incident infections, n (%)                        | 152              | 5192                | 196               | 5148                 |
| <b>Cumulative probability (95% CI) at 1 year</b>  | 4.8 (3.4-6.2)    | 3.7 (3.5-3.9)       | 5.3 (3.9-6.6)     | 3.7 (3.5-3.9)        |
| <b>Current daily dose, mg</b>                     |                  |                     |                   |                      |
| nonuse                                            | 2.9 (1.2-4.5)    | 2.4 (2.2-2.7)       | 3.7 (2.0-5.5)     | 2.4 (2.2-2.7)        |
| >0-4.9                                            | 4.5 (1.2-7.7)    | 3.6 (3.1-4.0)       | 5.3 (2.2-8.3)     | 3.5 (3.1-3.9)        |
| 5.0-14.9                                          | 7.2 (4.0-10.2)   | 4.6 (4.2-4.9)       | 5.4 (2.8-7.9)     | 4.6 (4.2-5.0)        |
| 15.0-24.9                                         | 9.4 (1.9-16.3)   | 7.2 (6.1-8.3)       | 9.2 (2.5-15.6)    | 7.2 (6.1-8.3)        |
| ≥25.0                                             | 0.0 (0.0-0.0)    | 8.2 (6.4-10.0)      | 15.5 (2.0-27.2)   | 7.7 (5.9-9.4)        |
| <b>Cumulative dose in last year, mg</b>           |                  |                     |                   |                      |
| nonuse (ref)                                      | 1.1 (0.3-1.9)    | 0.8 (0.7-0.9)       | 0.8 (0.2-1.4)     | 0.8 (0.7-0.9)        |
| >0-959.9                                          | 12.9 (4.0-21.0)  | 13.9 (12.5-15.4)    | 30.5 (17.5-41.5)  | 13.5 (12.0-14.9)     |
| 960.0-3,054.9                                     | 17.6 (9.4-25.0)  | 18.5 (17.1-19.9)    | 26.0 (15.3-35.5)  | 18.3 (16.9-19.7)     |
| ≥3055.0                                           | 39.9 (14.9-57.6) | 25.4 (22.4-28.3)    | 40.6 (14.8-58.6)  | 25.3 (22.3-28.3)     |
| <b>Total cumulative dose, mg</b>                  |                  |                     |                   |                      |
| nonuse (ref)                                      | 5.5 (1.5-9.4)    | 3.9 (3.4-4.4)       | 3.3 (0.4-6.2)     | 4.0 (3.5-4.5)        |
| >0-959.9                                          | 7.3 (2.6-11.8)   | 6.9 (6.1-7.6)       | 11.4 (6.1-16.4)   | 6.8 (6.0-7.5)        |
| 960.0-3,054.9                                     | 4.7 (2.3-7.0)    | 4.5 (4.2-4.9)       | 5.5 (3.1-7.8)     | 4.5 (4.1-4.9)        |
| 3,055.0-7,299.9                                   | 3.7 (1.5-5.8)    | 2.1 (1.9-2.3)       | 3.4 (1.6-5.2)     | 2.1 (1.9-2.3)        |
| ≥7,300.0                                          | 3.0 (0.0-8.7)    | 1.2 (0.6-1.7)       | 3.8 (0.0-11.0)    | 1.2 (0.6-1.7)        |
| <b>Cumulative probability (95% CI) at 5 years</b> | 17.4 (14.5-20.3) | 13.0 (12.6-13.4)    | 16.2 (13.7-18.5)  | 13.0 (12.6-13.4)     |
| <b>Current daily dose, mg</b>                     |                  |                     |                   |                      |
| nonuse (ref)                                      | 13.2 (9.9-16.4)  | 8.7 (8.3-9.1)       | 12.3 (9.5-15.0)   | 8.7 (8.3-9.1)        |
| >0-4.9                                            | 25.9 (16.1-34.5) | 17.5 (16.3-18.7)    | 20.0 (12.9-26.6)  | 17.6 (16.3-18.8)     |
| 5.0-14.9                                          | 24.1 (15.8-31.5) | 20.2 (19.1-21.3)    | 21.1 (14.5-27.2)  | 20.3 (19.2-21.4)     |

|                                                    |                  |                     |                   |                      |
|----------------------------------------------------|------------------|---------------------|-------------------|----------------------|
| 15.0-24.9                                          | 21.6 (5.9-34.7)  | 24.7 (21.8-27.5)    | 24.1 (8.5-37.0)   | 24.7 (21.7-27.5)     |
| ≥25.0                                              | 15.4 (0.0-32.9)  | 27.8 (23.3-32.0)    | 38.4 (14.2-55.8)  | 27.1 (22.6-31.4)     |
| <b>Cumulative dose in last year, mg</b>            |                  |                     |                   |                      |
| nonuse (ref)                                       | 9.3 (6.7-11.9)   | 5.8 (5.5-6.1)       | 7.4 (5.3-9.5)     | 5.8 (5.5-6.2)        |
| >0-959.9                                           | 30.4 (16.2-42.2) | 26.0 (24.1-27.9)    | 36.4 (25.5-45.6)  | 25.8 (23.8-27.6)     |
| 960.0-3,054.9                                      | 49.5 (32.3-62.3) | 34.8 (32.8-36.6)    | 30.8 (21.3-39.2)  | 35.2 (33.3-37.1)     |
| ≥3,055.0                                           | 56.8 (0.0-81.5)  | 47.4 (42.7-51.7)    | 58.3 (32.8-74.1)  | 47.4 (42.6-51.9)     |
| <b>Total cumulative dose, mg</b>                   |                  |                     |                   |                      |
| nonuse (ref)                                       | 24.6 (13.9-34.0) | 14.1 (12.9-15.3)    | 20.7 (11.4-29.0)  | 14.2 (13.0-15.3)     |
| >0-959.9                                           | 23.0 (13.5-31.4) | 17.0 (15.7-18.4)    | 30.4 (20.7-38.9)  | 16.8 (15.4-18.1)     |
| 960.0-3,054.9                                      | 21.0 (14.0-27.5) | 15.9 (15.0-16.9)    | 18.8 (13.3-24.0)  | 16.0 (15.0-16.9)     |
| 3,055.0-7,299.9                                    | 15.4 (10.2-20.2) | 13.7 (12.9-14.4)    | 16.1 (11.6-20.4)  | 13.6 (12.9-14.4)     |
| ≥7,300.0                                           | 10.2 (5.5-14.8)  | 7.3 (6.7-7.9)       | 5.5 (2.4-8.5)     | 7.5 (6.9-8.1)        |
| <b>Cumulative probability (95% CI) at 10 years</b> | 25.0 (21.0-28.8) | 21.1 (20.5-21.7)    | 26.6 (22.7-30.3)  | 21.0 (20.4-21.6)     |
| <b>Current daily dose, mg</b>                      |                  |                     |                   |                      |
| nonuse (ref)                                       | 18.9 (14.5-23.1) | 15.8 (15.2-16.5)    | 19.6 (15.5-23.6)  | 15.8 (15.1-16.5)     |
| >0-4.9                                             | 35.0 (21.4-46.2) | 27.7 (25.8-29.6)    | 34.1 (21.4-44.8)  | 27.7 (25.7-29.6)     |
| 5.0-14.9                                           | 34.7 (23.1-44.5) | 30.8 (29.1-32.6)    | 39.6 (26.5-50.4)  | 30.7 (28.9-32.4)     |
| 15.0-24.9                                          | 42.9 (0.0-68.7)  | 38.1 (33.1-42.7)    | 42.3 (16.9-60.0)  | 37.9 (32.9-42.6)     |
| ≥25.0                                              | 57.7 (0.0-89.6)  | 39.1 (32.2-45.3)    | 79.5 (0.0-96.0)   | 38.1 (31.2-44.3)     |
| <b>Cumulative dose in last year, mg</b>            |                  |                     |                   |                      |
| nonuse (ref)                                       | 16.0 (11.9-20.0) | 13.0 (12.4-13.6)    | 15.5 (11.7-19.2)  | 13.0 (12.4-13.6)     |
| >0-959.9                                           | 39.0 (21.9-52.3) | 33.0 (30.2-35.6)    | 54.4 (29.8-70.4)  | 32.5 (29.8-35.2)     |
| 960.0-3,054.9                                      | 44.5 (27.6-57.4) | 40.4 (37.7-43.0)    | 48.0 (31.2-60.7)  | 40.2 (37.5-42.8)     |
| ≥3,055.0                                           | 50.7 (14.7-71.6) | 50.8 (43.8-57.0)    | 43.3 (24.9-57.2)  | 50.6 (43.7-56.6)     |
| <b>Total cumulative dose, mg</b>                   |                  |                     |                   |                      |
| nonuse (ref)                                       | 36.4 (20.9-48.9) | 23.1 (21.2-25.0)    | 28.5 (15.9-39.3)  | 23.3 (21.4-25.1)     |
| >0-959.9                                           | 34.9 (21.3-46.1) | 25.6 (23.5-27.6)    | 41.0 (27.5-52.0)  | 25.3 (23.2-27.3)     |
| 960.0-3,054.9                                      | 30.2 (19.7-39.3) | 23.5 (22.1-24.9)    | 25.3 (17.9-32.0)  | 23.7 (22.2-25.0)     |
| 3,055.0-7,299.9                                    | 19.8 (12.6-26.5) | 21.6 (20.5-22.7)    | 25.0 (18.0-31.4)  | 21.5 (20.3-22.6)     |
| ≥7,300.0                                           | 17.5 (10.9-23.6) | 16.0 (15.0-17.1)    | 21.3 (13.8-28.2)  | 15.9 (14.9-16.9)     |
| <b>Parasitic infections</b>                        | <b>Rectal GC</b> | <b>No rectal GC</b> | <b>Topical GC</b> | <b>No topical GC</b> |
| Incident infections, n (%)                         | 29               | 1091                | 49                | 1071                 |
| <b>Cumulative probability (95% CI) at 1 year</b>   | 1.6 (0.7-2.4)    | 0.9 (0.8-1.0)       | 1.7 (0.9-2.4)     | 0.9 (0.8-1.0)        |
| <b>Current daily dose, mg</b>                      |                  |                     |                   |                      |

|                                                    |                 |                 |                 |                  |
|----------------------------------------------------|-----------------|-----------------|-----------------|------------------|
| nonuse (ref)                                       | 0.8 (0.0-1.6)   | 0.6 (0.5-0.7)   | 1.1 (0.1-2.0)   | 0.6 (0.5-0.7)    |
| >0-4.9                                             | 2.5 (0.0-5.0)   | 0.8 (0.6-1.0)   | 1.4 (0.0-3.1)   | 0.8 (0.6-1.0)    |
| 5.0-14.9                                           | 1.6 (0.0-3.2)   | 1.1 (0.9-1.3)   | 2.0 (0.4-3.5)   | 1.1 (0.9-1.3)    |
| 15.0-24.9                                          | 3.4 (0.0-7.8)   | 1.9 (1.3-2.5)   | 3.9 (0.0-8.1)   | 1.9 (1.3-2.5)    |
| ≥25.0                                              | 2.9 (0.0-8.2)   | 2.0 (1.1-3.0)   | 3.2 (0.0-9.2)   | 2.0 (1.1-2.9)    |
| <b>Cumulative dose in last year, mg</b>            |                 |                 |                 |                  |
| nonuse (ref)                                       | 0.1 (0.0-0.4)   | 0.2 (0.1-0.2)   | 0.2 (0.0-0.5)   | 0.2 (0.1-0.2)    |
| >0-959.9                                           | 9.0 (1.0-16.4)  | 3.4 (2.6-4.2)   | 16.0 (4.8-25.8) | 3.3 (2.5-4.1)    |
| 960.0-3,054.9                                      | 7.4 (0.0-14.5)  | 5.6 (4.7-6.5)   | 13.3 (4.1-21.7) | 5.4 (4.5-6.3)    |
| ≥3055.0                                            | 18.7 (0.0-34.1) | 7.6 (5.6-9.6)   | 0.0 (0.0- 0.0)  | 8.1 (6.0-10.1)   |
| <b>Total cumulative dose, mg</b>                   |                 |                 |                 |                  |
| nonuse (ref)                                       | 0.8 (0.0-2.3)   | 1.0 (0.8-1.3)   | 1.3 (0.0-3.1)   | 1.0 (0.8-1.3)    |
| >0-959.9                                           | 4.0 (0.5-7.5)   | 1.5 (1.1-1.9)   | 5.4 (1.7-9.0)   | 1.5 (1.1-1.8)    |
| 960.0-3,054.9                                      | 1.0 (0.0-2.2)   | 1.1 (1.0-1.3)   | 2.2 (0.7-3.7)   | 1.1 (0.9-1.3)    |
| 3,055.0-7,299.9                                    | 1.6 (0.2-3.0)   | 0.5 (0.4-0.6)   | 0.0 (0.0-0.0)   | 0.5 (0.4-0.6)    |
| ≥7,300.0                                           | 0.0 (0.0-0.0)   | 0.4 (0.1-0.8)   | 0.0 (0.0-0.0)   | 0.4 (0.1-0.8)    |
| <b>Cumulative probability (95% CI) at 5 years</b>  | 3.0 (1.8-4.2)   | 2.8 (2.6-3.0)   | 3.8 (2.6-5.0)   | 2.7 (2.6-2.9)    |
| <b>Current daily dose, mg</b>                      |                 |                 |                 |                  |
| nonuse (ref)                                       | 2.5 (1.1- 3.9)  | 1.8 (1.6-2.0)   | 2.3 (1.0-3.5)   | 1.8 (1.6-2.0)    |
| >0-4.9                                             | 4.6 (0.6- 8.4)  | 3.3 (2.7-3.8)   | 4.0 (0.8-7.0)   | 3.3 (2.7-3.8)    |
| 5.0-14.9                                           | 2.4 (0.0- 4.6)  | 4.6 (4.0-5.1)   | 6.1 (2.5-9.6)   | 4.5 (3.9-5.0)    |
| 15.0-24.9                                          | 6.6 (0.0-15.0)  | 6.4 (4.8-8.0)   | 11.0 (0.0-21.0) | 6.3 (4.7-7.9)    |
| ≥25.0                                              | 4.5 (0.0-12.9)  | 7.3 (4.6-9.8)   | 14.0 (0.0-27.6) | 7.0 (4.3-9.5)    |
| <b>Cumulative dose in last year, mg</b>            |                 |                 |                 |                  |
| nonuse (ref)                                       | 1.1 (0.2-2.0)   | 1.1 (1.0-1.3)   | 1.2 (0.4-2.0)   | 1.1 (1.0-1.3)    |
| >0-959.9                                           | 7.7 (1.5-13.5)  | 5.4 (4.4-6.3)   | 9.9 (4.0-15.3)  | 5.3 (4.4-6.3)    |
| 960.0-3,054.9                                      | 5.5 (0.9-9.9)   | 9.3 (8.0-10.5)  | 13.0 (5.6-19.8) | 9.1 (7.8-10.4)   |
| ≥3,055.0                                           | 10.8 (1.1-19.5) | 13.4 (9.9-16.8) | 5.9 (0.0-13.5)  | 13.7 (10.0-17.1) |
| <b>Total cumulative dose</b>                       |                 |                 |                 |                  |
| nonuse (ref)                                       | 1.0 (0.0-2.9)   | 3.4 (2.8-4.0)   | 5.5 (0.6-10.2)  | 3.3 (2.7-3.9)    |
| >0-959.9                                           | 8.1 (2.4-13.4)  | 3.8 (3.1-4.4)   | 7.5 (2.9-11.9)  | 3.7 (3.1-4.4)    |
| 960.0-3,054.9                                      | 4.4 (1.1-7.5)   | 3.6 (3.1-4.0)   | 6.9 (3.3-10.3)  | 3.5 (3.0-4.0)    |
| 3,055.0-7,299.9                                    | 3.4 (1.0-5.7)   | 2.8 (2.4-3.1)   | 2.1 (0.4-3.7)   | 2.8 (2.4-3.1)    |
| ≥7,300.0                                           | 0.0 (0.0-0.0)   | 1.4 (1.2-1.7)   | 0.8 (0.0-1.9)   | 1.4 (1.2-1.7)    |
| <b>Cumulative probability (95% CI) at 10 years</b> | 4.4 (2.7-6.1)   | 4.2 (4.0-4.5)   | 5.6 (3.9-7.3)   | 4.2 (3.9-4.5)    |

|                                                  |                  |                     |                   |                      |
|--------------------------------------------------|------------------|---------------------|-------------------|----------------------|
| <b>Current daily dose, mg</b>                    |                  |                     |                   |                      |
| nonuse (ref)                                     | 3.4 (1.5-5.2)    | 3.0 (2.7-3.3)       | 3.6 (1.9-5.3)     | 3.0 (2.7-3.3)        |
| >0-4.9                                           | 6.3 (0.9-11.5)   | 5.3 (4.4-6.2)       | 8.5 (1.9-14.7)    | 5.2 (4.3-6.1)        |
| 5.0-14.9                                         | 4.5 (0.0-9.0)    | 6.9 (5.9-7.8)       | 7.0 (2.9-10.9)    | 6.8 (5.8-7.8)        |
| 15.0-24.9                                        | 6.8 (0.0-15.4)   | 9.7 (6.7-12.6)      | 19.1 (0.0-35.2)   | 9.3 (6.3-12.1)       |
| ≥25.0                                            | 20.3 (0.0-44.8)  | 11.2 (6.7-15.5)     | 18.4 (0.0-35.4)   | 11.4 (6.8-15.8)      |
| <b>Cumulative dose in last year, mg</b>          |                  |                     |                   |                      |
| nonuse (ref)                                     | 2.1 (0.6-3.6)    | 2.3 (2.0-2.6)       | 2.6 (1.1-4.1)     | 2.3 (2.0-2.5)        |
| >0-959.9                                         | 7.6 (1.6-13.3)   | 6.6 (5.4-7.9)       | 17.6 (6.5-27.4)   | 6.4 (5.1-7.6)        |
| 960.0-3,054.9                                    | 7.1 (0.2-13.7)   | 10.5 (8.6-12.3)     | 9.1 (4.4-13.5)    | 10.5 (8.6-12.3)      |
| ≥3,055.0                                         | 17.0 (0.0-33.4)  | 10.5 (6.2-14.7)     | 3.2 (0.0-7.5)     | 10.9 (6.7-14.9)      |
| <b>Total cumulative dose, mg</b>                 |                  |                     |                   |                      |
| nonuse (ref)                                     | 1.1 (0.0-3.2)    | 5.3 (4.3-6.3)       | 6.2 (0.6-11.5)    | 5.2 (4.2-6.1)        |
| >0-959.9                                         | 10.0 (3.3-16.3)  | 5.7 (4.6-6.7)       | 9.8 (3.5-15.7)    | 5.6 (4.6-6.7)        |
| 960.0-3,054.9                                    | 5.8 (1.6-9.9)    | 5.2 (4.4-5.9)       | 9.5 (4.5-14.2)    | 5.0 (4.3-5.7)        |
| 3,055.0-7,299.9                                  | 3.6 (1.1-6.1)    | 4.0 (3.5-4.6)       | 4.0 (0.9-7.0)     | 4.0 (3.5-4.6)        |
| ≥7,300.0                                         | 2.4 (0.0-5.1)    | 2.9 (2.5-3.3)       | 2.6 (0.5- 4.6)    | 2.9 (2.4-3.3)        |
| <b>Fungal infections</b>                         | <b>Rectal GC</b> | <b>No rectal GC</b> | <b>Topical GC</b> | <b>No topical GC</b> |
| Incident infections, n (%)                       | 197              | 5219                | 269               | 5147                 |
| <b>Cumulative probability (95% CI) at 1 year</b> | 7.4 (5.6-9.0)    | 3.8 (3.6-4.0)       | 6.7 (5.2-8.1)     | 3.8 (3.6-4.0)        |
| <b>Current daily dose, mg</b>                    |                  |                     |                   |                      |
| nonuse (ref)                                     | 4.0 (2.0-6.0)    | 2.4 (2.2-2.6)       | 4.4 (2.5-6.3)     | 2.4 (2.1-2.6)        |
| >0-4.9                                           | 8.9 (4.5-13.1)   | 3.9 (3.5-4.4)       | 7.2 (3.6-10.7)    | 3.9 (3.5-4.4)        |
| 5.0-14.9                                         | 10.0 (6.3-13.6)  | 4.6 (4.2-5.0)       | 8.1 (5.0-11.1)    | 4.6 (4.2-5.0)        |
| 15.0-24.9                                        | 11.3 (3.0-18.9)  | 7.2 (6.1-8.3)       | 10.2 (3.2-16.7)   | 7.2 (6.1-8.3)        |
| ≥25.0                                            | 8.6 ( 0.0-17.4)  | 8.5 (6.7-10.3)      | 12.4 (0.2-23.2)   | 8.4 (6.6-10.2)       |
| <b>Cumulative dose in last year, mg</b>          |                  |                     |                   |                      |
| nonuse (ref)                                     | 1.4 (0.6-2.3)    | 0.8 (0.7-0.9)       | 0.8 (0.2-1.4)     | 0.9 (0.7-1.0)        |
| >0-959.9                                         | 22.1 (11.4-31.6) | 12.7 (11.3-14.0)    | 36.6 (25.5-46.0)  | 12.0 (10.7-13.4)     |
| 960.0-3,054.9                                    | 29.6 (20.1-38.0) | 20.0 (18.6-21.4)    | 29.6 (18.7-39.0)  | 20.1 (18.6-21.5)     |
| ≥3,055.0                                         | 35.7 (12.9-52.5) | 24.1 (21.0-27.0)    | 34.9 (9.0-53.5)   | 24.1 (21.0-27.0)     |
| <b>Total cumulative dose, mg</b>                 |                  |                     |                   |                      |
| nonuse (ref)                                     | 7.7 (3.0-12.2)   | 4.3 (3.7-4.8)       | 3.8 (0.8-6.7)     | 4.3 (3.8-4.9)        |
| >0-959.9                                         | 10.1 (4.7-15.1)  | 6.5 (5.8-7.2)       | 18.8 (12.5-24.7)  | 6.2 (5.5-6.9)        |
| 960.0-3,054.9                                    | 10.1 (6.7-13.3)  | 5.1 (4.7-5.5)       | 7.3 (4.5-9.9)     | 5.1 (4.7-5.5)        |

|                                                    |                         |                         |                         |                         |
|----------------------------------------------------|-------------------------|-------------------------|-------------------------|-------------------------|
| 3,055.0-7,299.9                                    | 3.7 (1.5- 5.9)          | 1.8 (1.6-2.0)           | 2.6 (1.0-4.2)           | 1.8 (1.6-2.0)           |
| ≥7,300.0                                           | 0.0 (0.0- 0.0)          | 1.4 (0.8-2.0)           | 0.0 (0.0-0.0)           | 1.4 (0.8-2.0)           |
| <b>Cumulative probability (95% CI) at 5 years</b>  | <b>22.7 (19.4-25.8)</b> | <b>13.5 (13.1-13.9)</b> | <b>22.5 (19.7-25.2)</b> | <b>13.4 (13.0-13.8)</b> |
| <b>Current daily dose, mg</b>                      |                         |                         |                         |                         |
| nonuse (ref)                                       | 16.3 (12.6-19.9)        | 9.2 (8.8-9.6)           | 17.4 (14.1-20.6)        | 9.1 (8.7-9.6)           |
| >0-4.9                                             | 35.7 (25.2-44.8)        | 18.1 (16.9-19.3)        | 28.8 (20.7-36.1)        | 18.2 (17.0-19.4)        |
| 5.0-14.9                                           | 30.4 (22.2-37.7)        | 20.2 (19.1-21.3)        | 30.1 (22.6-36.8)        | 20.2 (19.1-21.3)        |
| 15.0-24.9                                          | 28.8 ( 9.5-44.0)        | 27.7 (24.5-30.7)        | 31.5 (14.1-45.4)        | 27.7 (24.5-30.7)        |
| ≥25.0                                              | 21.2 ( 0.0-39.0)        | 26.9 (22.7-30.8)        | 32.8 (10.5-49.6)        | 26.5 (22.3-30.5)        |
| <b>Cumulative dose in last year, mg</b>            |                         |                         |                         |                         |
| nonuse (ref)                                       | 10.6 (7.7-13.4)         | 6.2 (5.8-6.5)           | 10.5 (8.0-12.9)         | 6.1 (5.8-6.5)           |
| >0-959.9                                           | 47.3 (29.6-60.5)        | 26.1 (24.3-28.0)        | 46.9 (37.0-55.3)        | 26.0 (24.1-27.9)        |
| 960.0-3,054.9                                      | 57.3 (42.0-68.7)        | 36.4 (34.5-38.3)        | 49.7 (37.4-59.5)        | 36.5 (34.5-38.4)        |
| ≥3,055.0                                           | 47.3 (25.9-62.5)        | 45.1 (40.4-49.4)        | 54.7 (33.4-69.1)        | 45.0 (40.2-49.3)        |
| <b>Total cumulative dose, mg</b>                   |                         |                         |                         |                         |
| nonuse (ref)                                       | 31.6 (19.6-41.8)        | 15.2 (14.0-16.4)        | 28.0 (17.7-37.1)        | 15.2 (14.0-16.4)        |
| >0-959.9                                           | 21.9 (13.1-29.8)        | 17.2 (15.8-18.5)        | 37.4 (28.3-45.4)        | 16.5 (15.2-17.8)        |
| 960.0-3,054.9                                      | 28.3 (21.1-34.9)        | 17.7 (16.8-18.7)        | 30.8 (24.3-36.8)        | 17.6 (16.7-18.6)        |
| 3,055.0-7,299.9                                    | 22.7 (16.5-28.4)        | 13.6 (12.8-14.3)        | 18.6 (13.7-23.3)        | 13.6 (12.9-14.4)        |
| ≥7,300.0                                           | 12.1 (6.8-17.1)         | 7.4 (6.8-8.0)           | 9.3 (5.3-13.1)          | 7.4 (6.8-8.0)           |
| <b>Cumulative probability (95% CI) at 10 years</b> | <b>31.7 (27.3-35.9)</b> | <b>21.0 (20.4-21.6)</b> | <b>34.1 (30.0-38.0)</b> | <b>20.8 (20.2-21.4)</b> |
| <b>Current daily dose, mg</b>                      |                         |                         |                         |                         |
| nonuse (ref)                                       | 24.9 (19.6-29.8)        | 16.0 (15.3-16.7)        | 29.2 (24.1-33.9)        | 15.8 (15.1-16.5)        |
| >0-4.9                                             | 45.6 (31.5-56.8)        | 28.1 (26.2-30.0)        | 42.5 (31.0-52.1)        | 28.0 (26.1-29.9)        |
| 5.0-14.9                                           | 40.8 (29.3-50.4)        | 29.1 (27.5-30.8)        | 37.5 (27.4-46.3)        | 29.2 (27.5-30.8)        |
| 15.0-24.9                                          | 27.8 (9.1-42.6)         | 36.2 (31.9-40.2)        | 52.0 (22.8-70.1)        | 35.6 (31.3-39.6)        |
| ≥25.0                                              | 42.9 (3.4-66.2)         | 36.5 (30.2-42.3)        | 37.8 (12.0-56.1)        | 36.7 (30.3-42.5)        |
| <b>Cumulative dose in last year, mg</b>            |                         |                         |                         |                         |
| nonuse (ref)                                       | 20.6 (15.7-25.2)        | 13.2 (12.5-13.8)        | 23.9 (19.1-28.5)        | 13.0 (12.4-13.6)        |
| >0-959.9                                           | 39.9 (26.0-51.1)        | 32.8 (30.1-35.3)        | 57.8 (40.0-70.3)        | 32.1 (29.5-34.6)        |
| 960.0-3,054.9                                      | 62.3 (39.6-76.4)        | 37.3 (34.9-39.6)        | 39.9 (30.1-48.4)        | 37.8 (35.4-40.1)        |
| ≥3,055.0                                           | 47.5 (22.4-64.5)        | 47.0 (40.4-52.8)        | 48.2 (30.7-61.3)        | 46.6 (40.1-52.4)        |
| <b>Total cumulative dose, mg</b>                   |                         |                         |                         |                         |
| nonuse (ref)                                       | 43.9 (27.8-56.4)        | 22.8 (20.9-24.6)        | 34.7 (22.5-44.9)        | 22.9 (21.0-24.7)        |
| >0-959.9                                           | 33.3 (19.5-44.7)        | 26.0 (23.9-28.0)        | 47.5 (35.4-57.3)        | 25.4 (23.3-27.3)        |

|                 |                  |                  |                  |                  |
|-----------------|------------------|------------------|------------------|------------------|
| 960.0-3,054.9   | 34.5 (25.4-42.5) | 25.8 (24.4-27.2) | 45.9 (35.6-54.5) | 25.3 (23.9-26.8) |
| 3,055.0-7,299.9 | 34.8 (24.9-43.4) | 21.2 (20.1-22.4) | 31.4 (22.5-39.2) | 21.3 (20.1-22.4) |
| ≥7,300.0        | 20.4 (13.1-27.1) | 14.7 (13.7-15.6) | 21.0 (14.4-27.2) | 14.6 (13.6-15.6) |

Note: CI, confidence interval; GC, glucocorticoids; IQR, interquartile range. Estimates are shown for time-variant prednisolone-equivalent dosage.
